# Supplementary material for: Predictive chirality sensing via Schiff base formation
Source: Royal Society of Chemistry journal article supplement (doi:10.1039/c9ob01265f), 2019-01-01
Supplement: c9ob01265f1.pdf [file c9ob01265f1.pdf]

## **Supporting Information**

### **Predictive Chirality Sensing via Schiff Base Formation**

Samantha L. Pilicer,<sup>‡</sup> Michele Mancinelli<sup>†</sup>, Andrea Mazzanti,<sup>\*†</sup> Christian Wolf<sup>\*‡</sup>

<sup>†</sup>*Department of Industrial Chemistry “Toso Montanari”. University of Bologna, Viale  
Risorgimento 4, I-40136 Bologna, Italy. andrea.mazzanti@unibo.it*

<sup>‡</sup>*Department of Chemistry, Georgetown University, Washington, DC 20057, USA.  
cw27@georgetown.edu*

#### **Contents**

|                                                              |            |
|--------------------------------------------------------------|------------|
| <b>1. Structure Optimization and Optical Properties</b>      | <b>S2</b>  |
| <b>2. Synthetic Procedures and Compound Characterization</b> | <b>S10</b> |
| <b>2. NMR Spectra</b>                                        | <b>S11</b> |
| <b>3. Chiroptical Sensing</b>                                | <b>S15</b> |
| <b>4. UV Analysis</b>                                        | <b>S27</b> |
| <b>5. Quantitative Ee Determination</b>                      | <b>S34</b> |
| <b>6. Crystallographic Analysis</b>                          | <b>S35</b> |
| <b>7. Computational Data</b>                                 | <b>S36</b> |
| <b>8. References</b>                                         | <b>S81</b> |

## 1. Structure Optimization and Optical Properties

### DFT Calculations.

The Molecular Mechanics conformational search was performed using the MacroModel software<sup>Error! Bookmark not defined.</sup> and the MMFF force field by retaining all the conformations within the 10 kcal/mol range. Redundant conformations were then removed by the same software. Ground state optimizations were then optimized by DFT with the Gaussian 16 rev A.03 series of programs, using B3LYP/6-31G(d) and PCM-B3LYP/6-311++G(2d,p) and standard convergence parameters. The analysis of the vibrational frequencies for all the optimized structures showed the absence of imaginary frequencies. If not differently stated, the energy values presented in the results and discussion section derive from the ZPE-corrected enthalpy. This avoids artifacts that might result from the use of empirical scaling factors for frequencies,<sup>1</sup> and from the idealization of low-frequency vibrators as harmonic oscillators.<sup>2</sup> The latter factor is particularly important in the present case because more than 20% of the frequencies are below 500  $\text{cm}^{-1}$ , and more than 10% are below 200  $\text{cm}^{-1}$ .<sup>3</sup> The ECD spectra were calculated with TD-DFT using CAM-B3LYP and the 6-311++G(2d,p) basis set. For each conformation 25 discrete transitions were calculated (lowest calculated wavelength < 200 nm). The ECD spectra were generated by convolution of Gaussian shaped lines (0.25 eV line width) by the Gaussview Software<sup>4</sup>. The simulated spectra resulting from the Boltzmann averaged sum of the conformations were red-shifted and vertically scaled to get the best match with the experimental spectra.

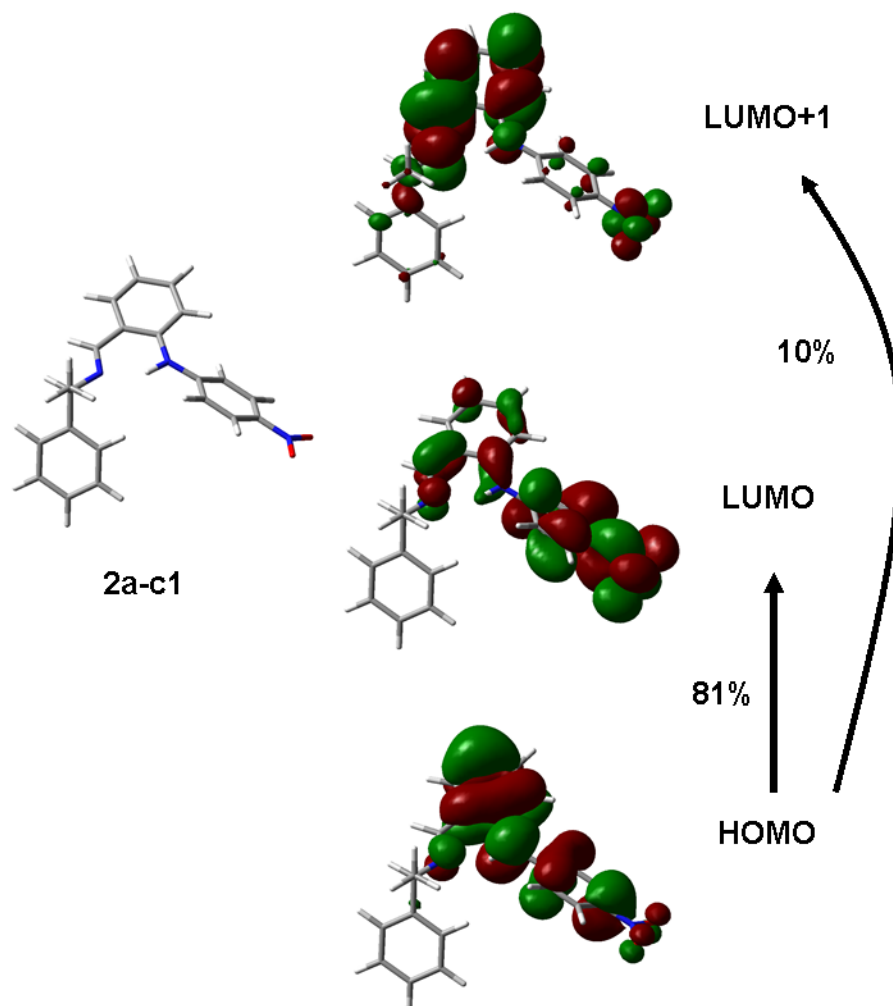

**Figure S1.** MOs involved in the UV/CD transition at 343 nm of 2a.

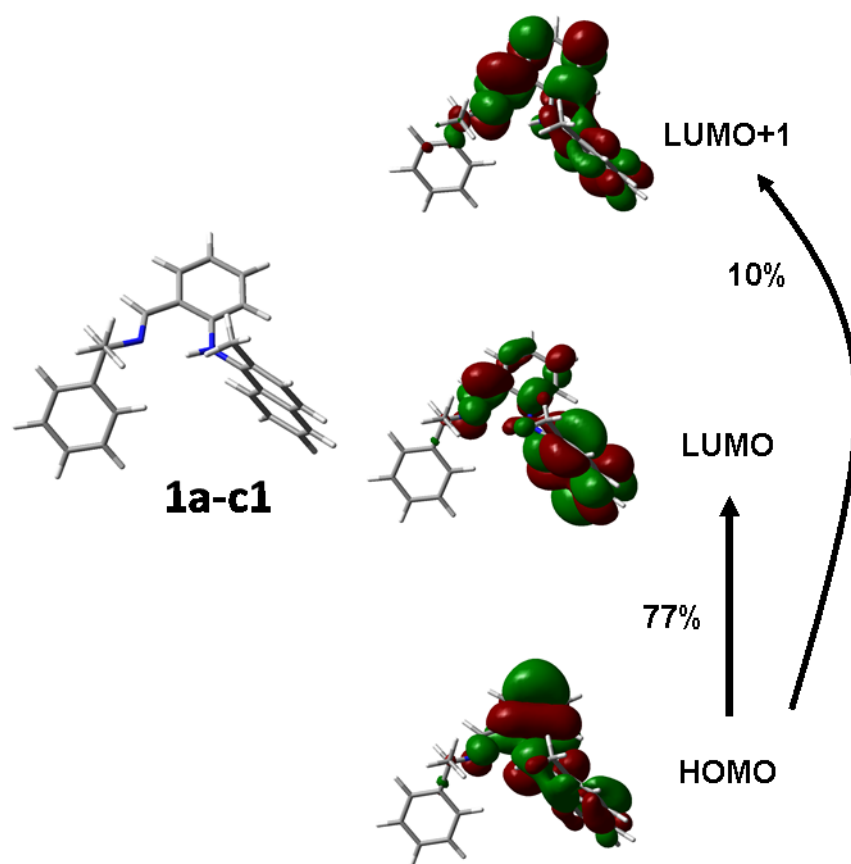

**Figure S2.** MOs involved in the UV/CD transition at 376 nm of **1a**.

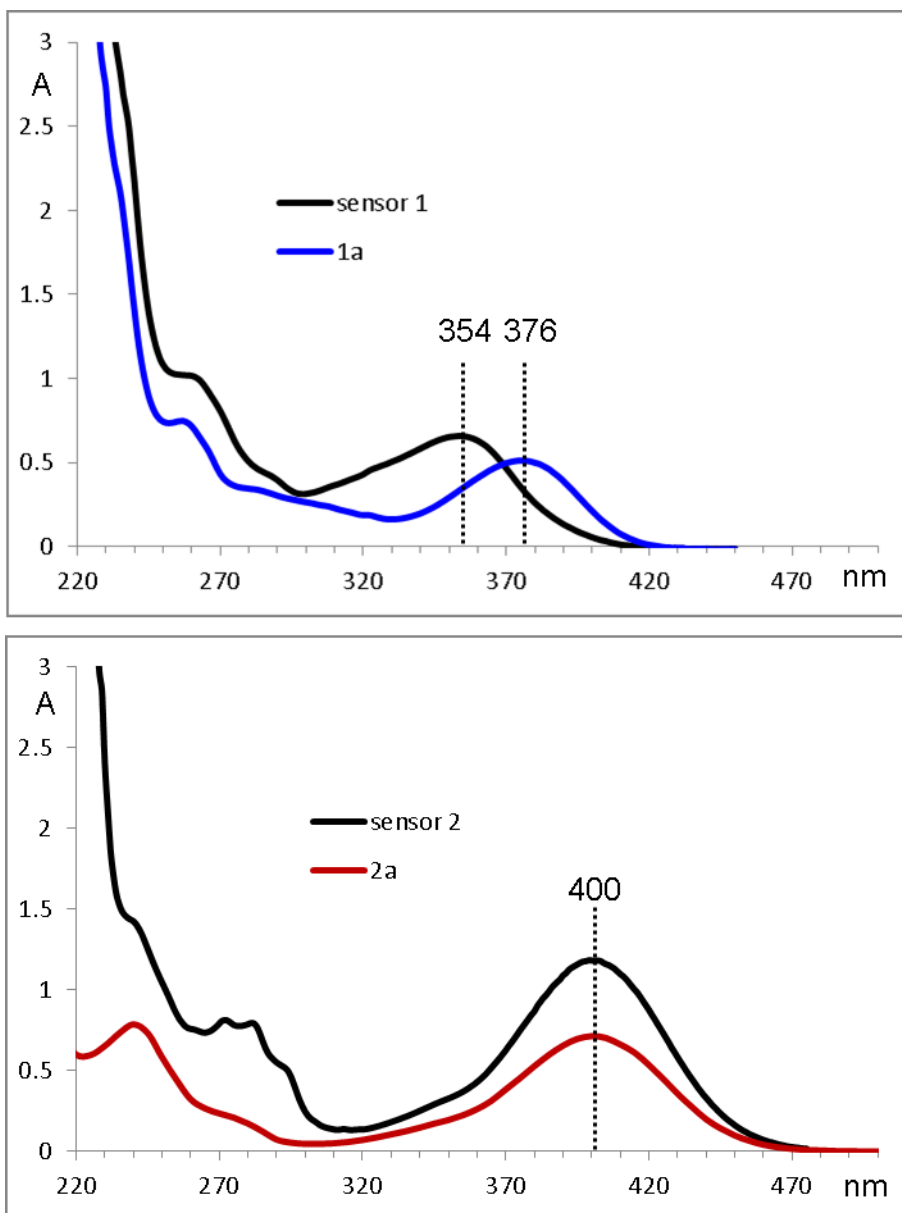

**Figure S3** Top: UV spectrum of **1** (black) and of the imine formed from **1** (68  $\mu\text{M}$ ) and (*R*)-1-phenylethan-1-amine (**1a**, blue) in acetonitrile (local  $\lambda_{\text{max}}$ =376 nm). Bottom: UV spectrum of **2** (black) and of the imine formed from **2** (60  $\mu\text{M}$ ) and (*R*)-1-phenylethan-1-amine (**2a**, red) in acetonitrile (local  $\lambda_{\text{max}}$ =400 nm).

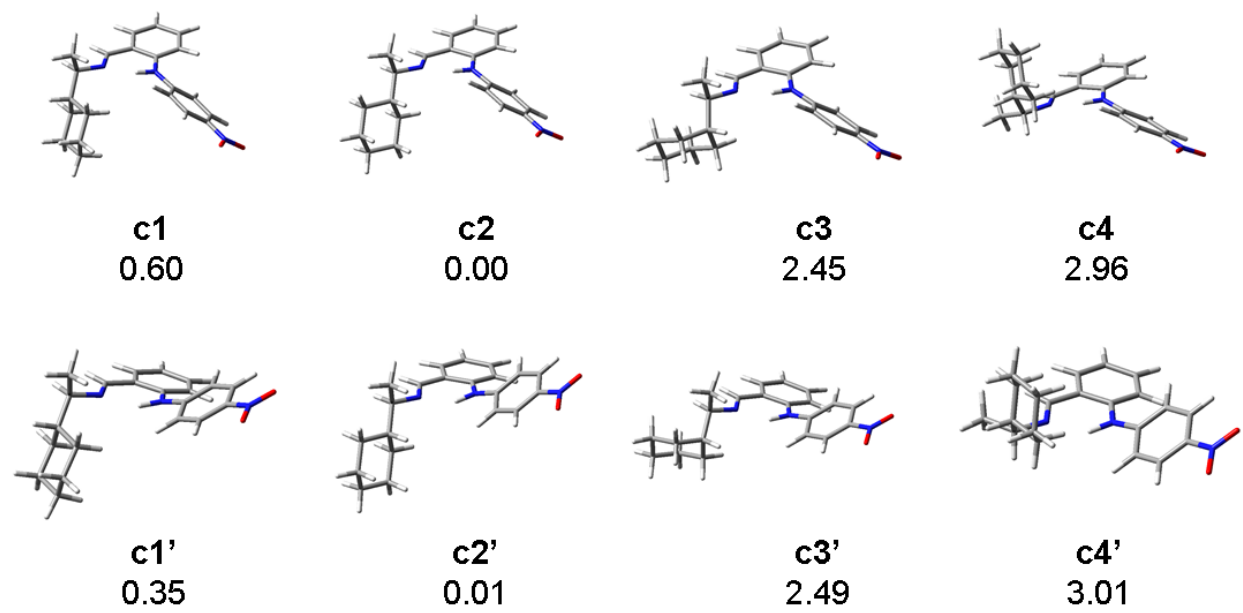

**Figure S4.** Geometries and relative energies of the most stable conformations of **2b**, optimized at the PCM-B3LYP/6-311++G(2d,p) level (energies in kcal/mol).

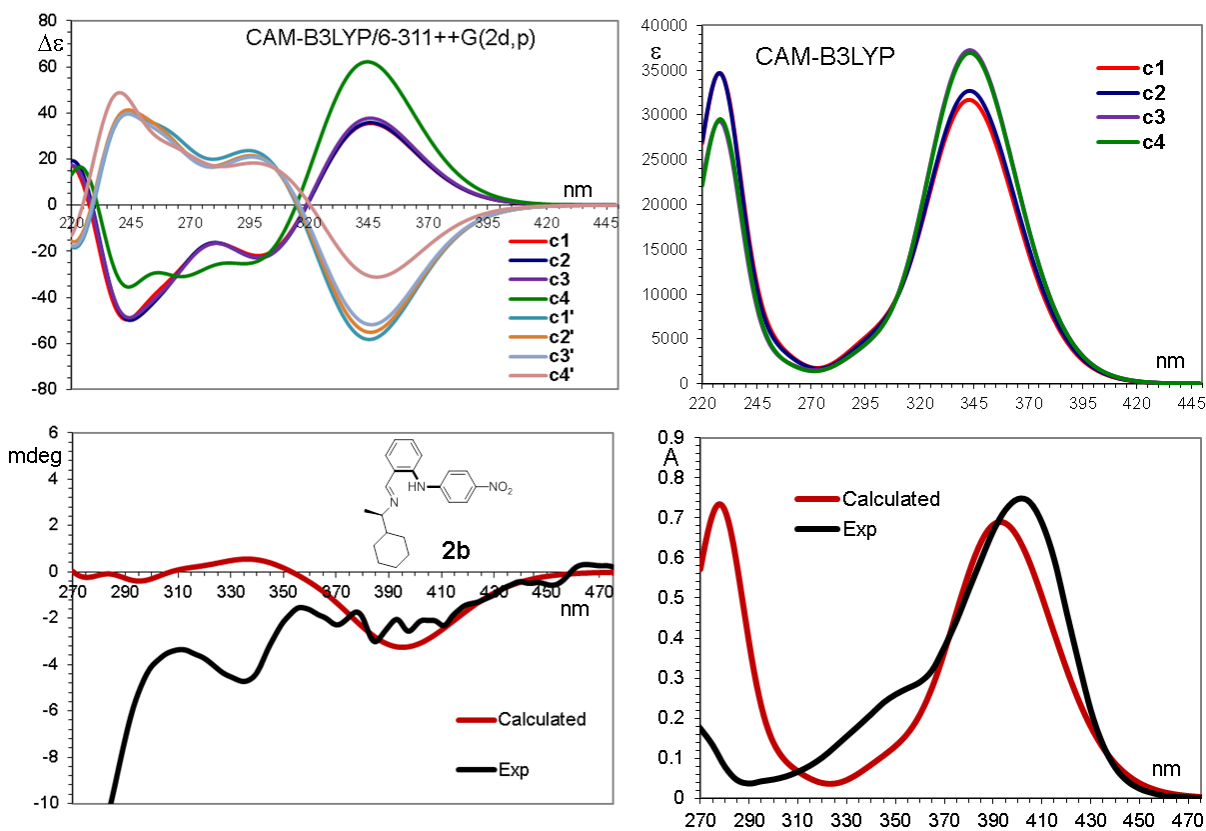

**Figure S5.** Top left: ECD simulations for the eight conformations of compound **2b**, obtained at the TD-DFT CAM-B3LYP/6-311++G(2d,p) level. Bottom Left: Simulated and experimental ECD spectra obtained using the conformational ratio derived from the energies reported in Figure S2. Top right: calculated UV spectra for conformations **c1-c4**. Bottom Right: simulated and experimental UV spectra. The simulated UV and ECD spectra were red-shifted by 50 nm.

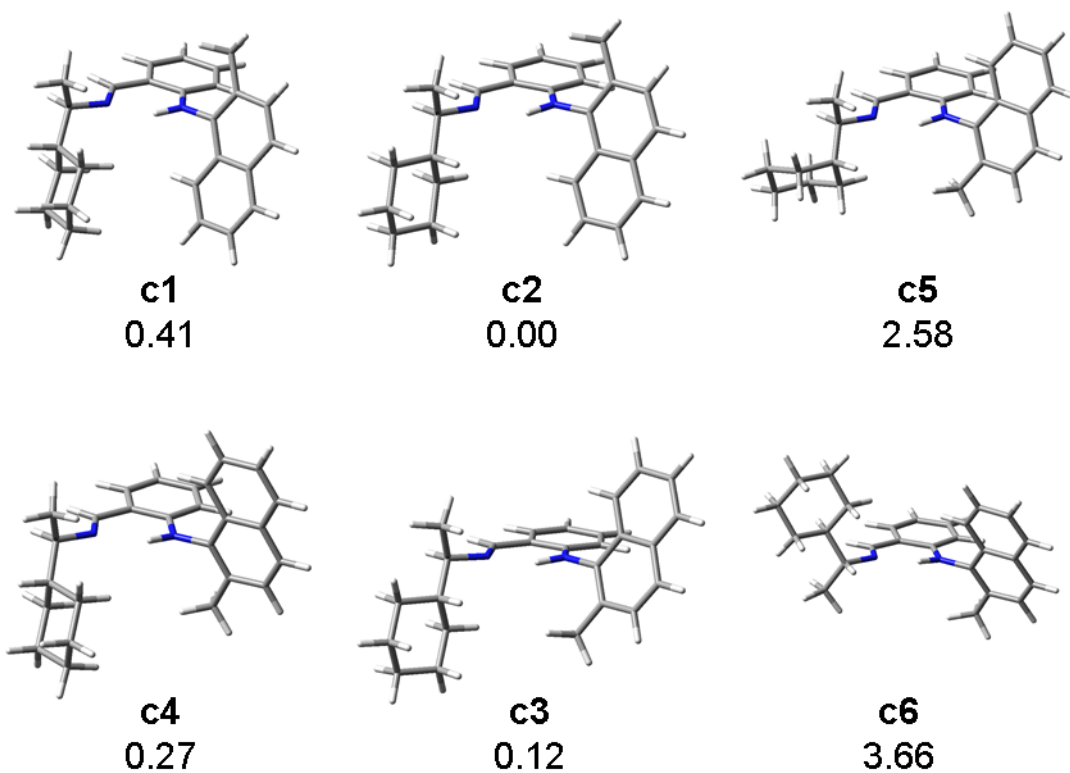

**Figure S6.** Geometries and relative energies of the best six conformations of **1b**, optimized at the PCM-B3LYP/6-311++G(2d,p) level (the conformations derived from the naphthyl rotation in conformations **c5** and **c6** are not shown; relative energies in kcal/mol).



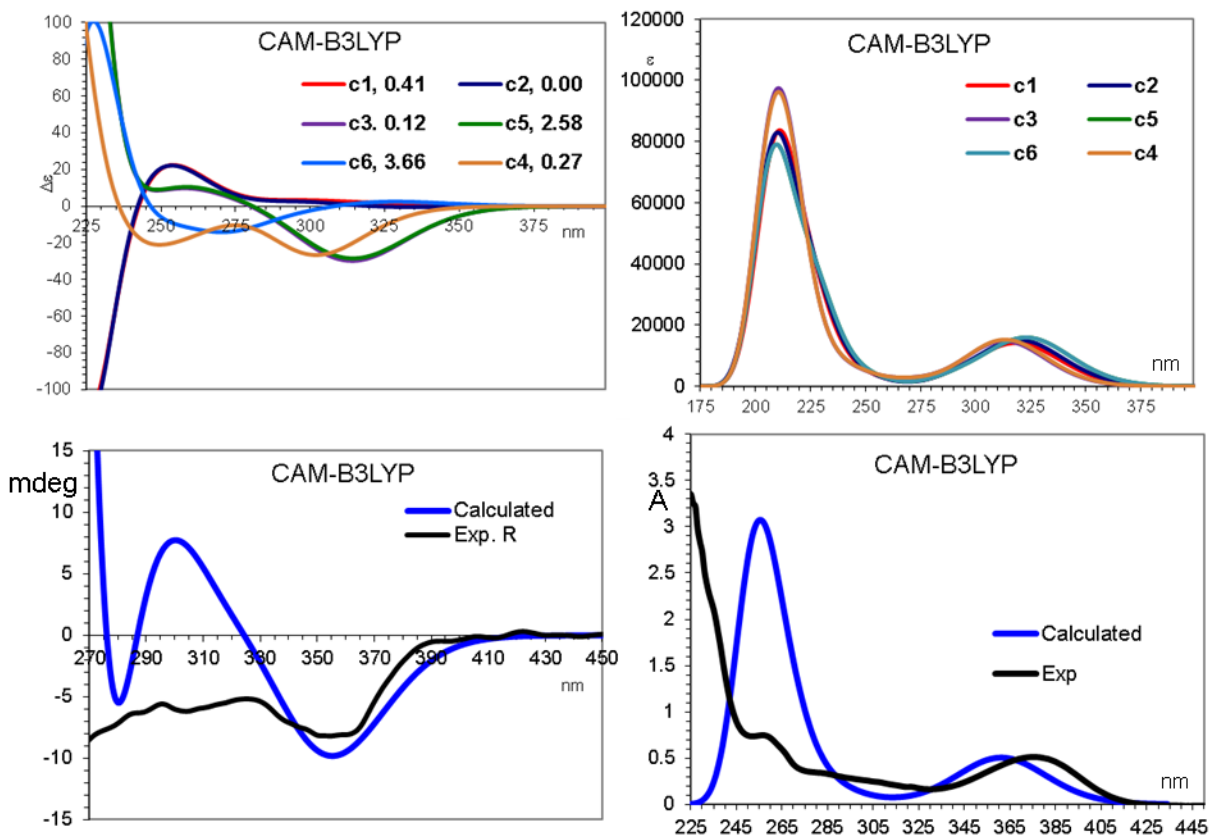

**Figure S7.** Top: ECD and UV simulations for the six conformations of compound **1b**, obtained at the TD-DFT CAM-B3LYP/6-311++G(2d,p) level. Bottom: Simulated (blue) ECD spectra obtained using the conformational ratio derived from the energies reported in Figure S4 and experimental results (black). The simulated spectra have been red-shifted by 45 nm.

## 2. Synthetic Procedures and Compound Characterization

All reagents and solvents were commercially available and used without further purification. NMR spectra were obtained at 400 MHz ( $^1\text{H}$  NMR) and 100 MHz ( $^{13}\text{C}$  NMR) using  $\text{CD}_3\text{CN}$  or  $\text{CDCl}_3$  as solvent. NMR signals are reported in ppm using the solvent peak as reference.

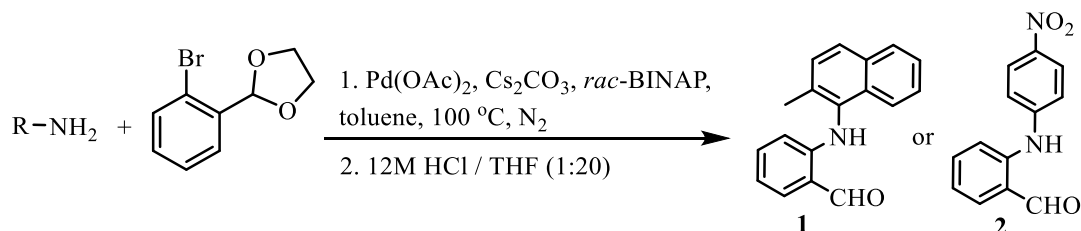

2-(2-Bromophenyl)-1,3-dioxolane (636 mg, 2.78 mmol for the synthesis of **1** and 400 mg, 1.75 mmol for the synthesis of **2**),<sup>5</sup>  $\text{Cs}_2\text{CO}_3$  (1.15 eq),  $\text{Pd}(\text{OAc})_2$  (4 mol%), *rac*-BINAP (7.5 mol%) and 1.1 equivalents of either 2-methylnaphthalen-1-amine (for synthesis of **1**) or 4-nitroaniline (for the synthesis of **2**) were dissolved in toluene (12 mL for the case of **1** and 8 mL for the case of **2**) under nitrogen atmosphere. The reaction mixture was heated to  $100\text{ }^\circ\text{C}$  for 16 and 14 hours for **1** and **2**, respectively. After cooling, toluene was removed *in vacuo* and the mixture was diluted with water and extracted with EtOAc (3x). The organic layers were combined and dried over  $\text{Na}_2\text{SO}_4$ . The crude product was then purified by silica column chromatography with hexanes/EtOAc gradients (3-15% EtOAc for **1**, and 5-15% EtOAc for **2**). Deprotection was carried out using 12M HCl in THF (1:20 v/v) at room temperature followed by extraction with ethyl acetate. The organic layers were combined and dried over  $\text{Na}_2\text{SO}_4$ . Solvent removal under vacuum gave the pure sensors.

### 2-((2-Methylnaphthalen-1-yl)amino)benzaldehyde<sup>6</sup>

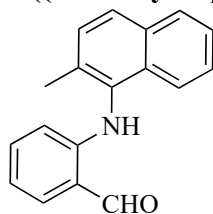

Compound **1** was obtained in 49% yield (358.4 mg, 1.37 mmol) over two steps.  $^1\text{H}$  NMR (400 MHz, in  $\text{CDCl}_3$ )  $\delta$  10.05 (s, 1H), 9.90 (s, 1H), 7.92-7.83 (m, 2H), 7.77 (d,  $J = 8.4$  Hz, 1H), 7.62 (dd,  $J = 7.7, 1.7$  Hz, 1H), 7.51 – 7.38 (m, 3H), 7.19 (dd,  $J = 8.7, 7.1$  Hz, 1H), 6.82 – 6.71 (m, 1H), 6.15 (d,  $J = 8.5$  Hz, 1H), 2.38 (s, 3H).  $^{13}\text{C}$  NMR (100 MHz,  $\text{CDCl}_3$ )  $\delta$  194.7, 150.3, 136.4, 135.9, 133.8, 133.4, 132.7, 131.7, 129.2, 128.2, 127.3, 126.8, 125.6, 123.3, 118.7, 116.3, 113.2, 18.5.

## 2-((4-Nitrophenyl)amino)benzaldehyde<sup>7</sup>

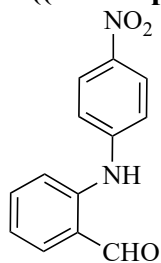

Compound **2** was obtained in 49% yield (210.3 mg, 0.87 mmol) over two steps. <sup>1</sup>H NMR (400 MHz, CD<sub>3</sub>CN) δ 10.11(br, 1H), 9.96 (s, 1H), 8.18 (d, 9.38 Hz, 2H), 7.80 (d, *J* = 7.45, 1H), 7.57 (d, 4.07 Hz, 2H), 7.38 (d, *J* = 9.22 Hz, 2H), 7.20 – 7.07 (m, 1H). <sup>13</sup>C NMR (100 MHz, CD<sub>3</sub>CN) δ 196.0, 148.3, 137.6, 136.5, 126.5, 123.3, 121.8, 119.4, 118.3, 116.8.

## 2. NMR Spectra

<sup>1</sup>H NMR Spectrum of **1** in CDCl<sub>3</sub>

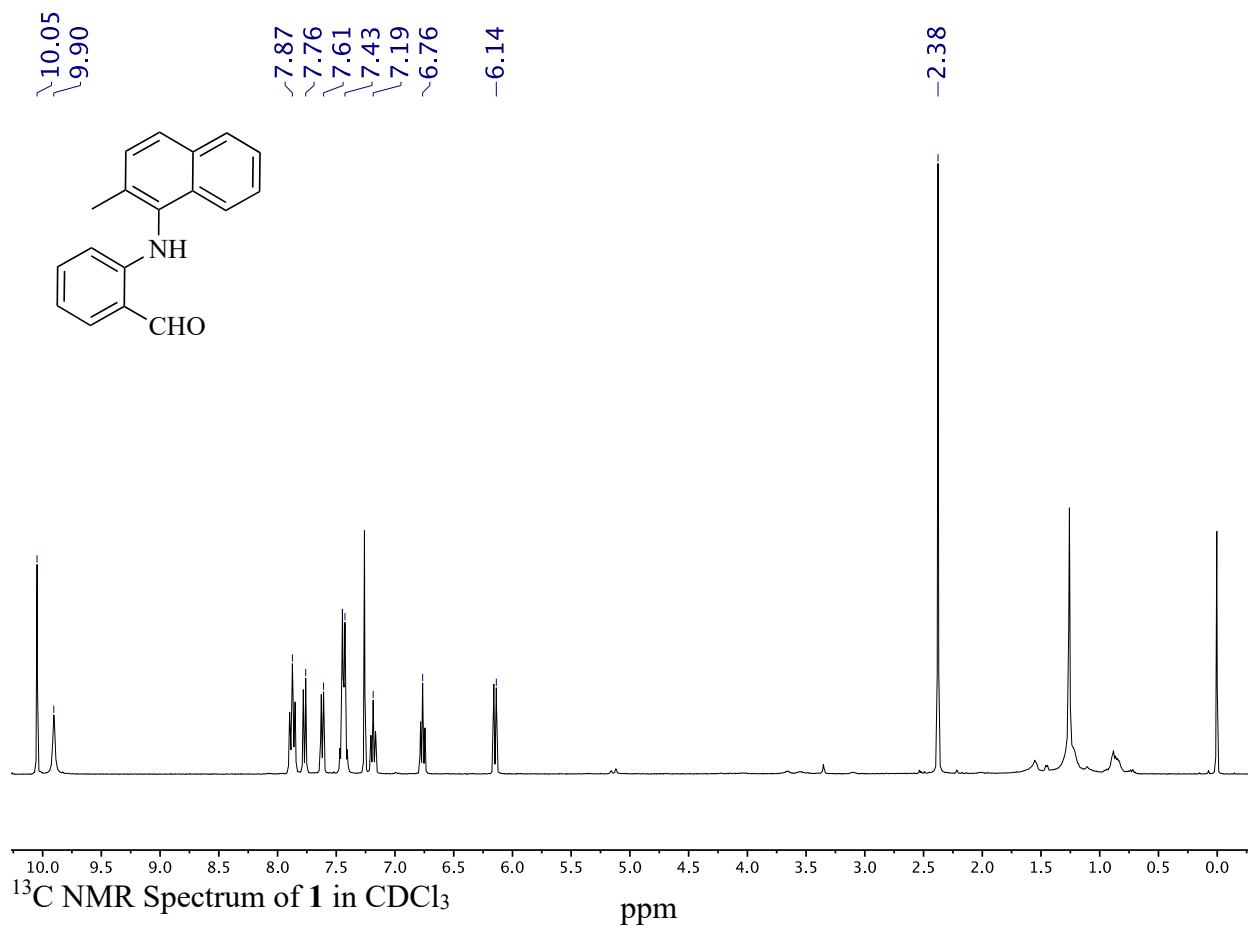

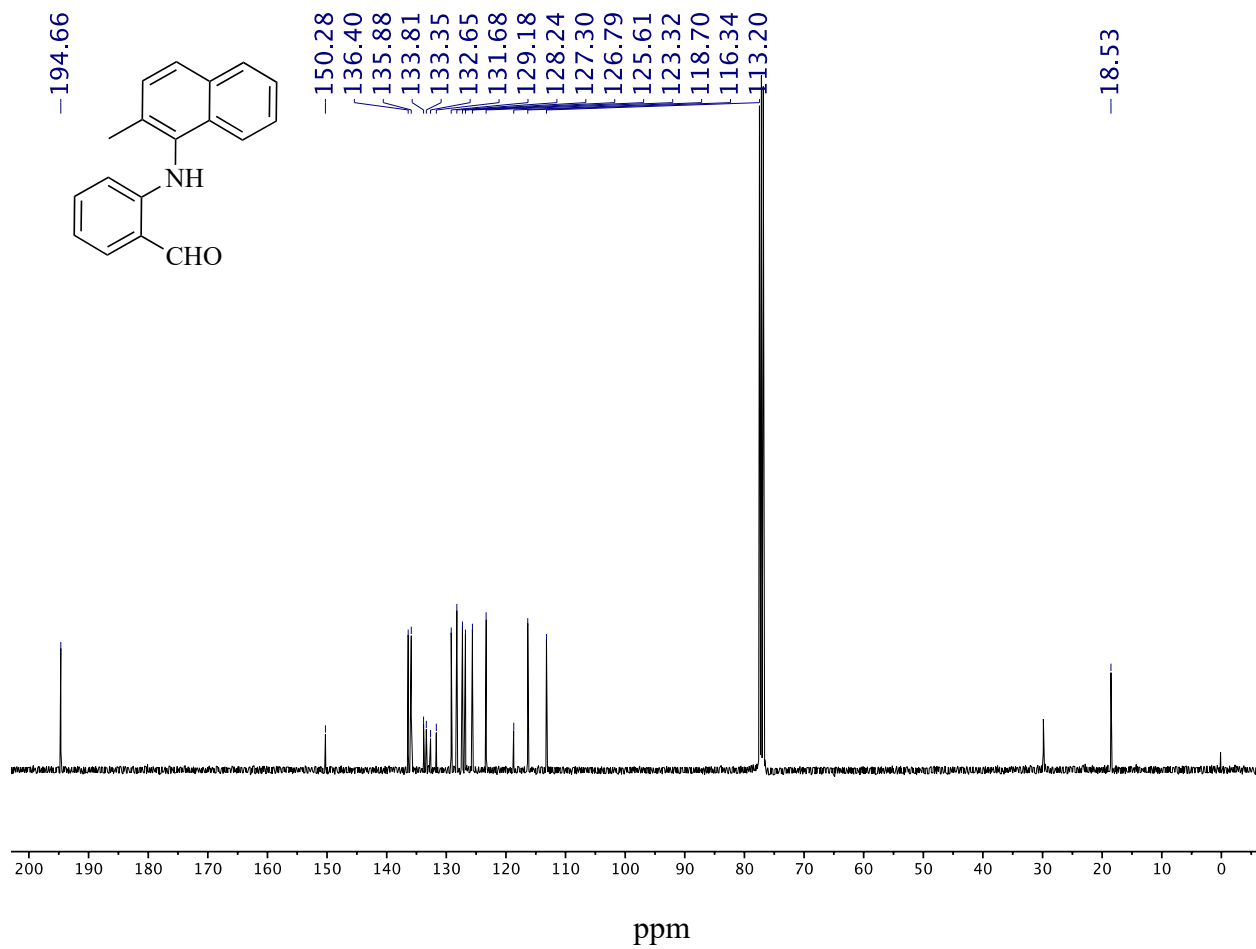

$^1\text{H}$  NMR Spectrum of **2** in  $\text{CD}_3\text{CN}$ .

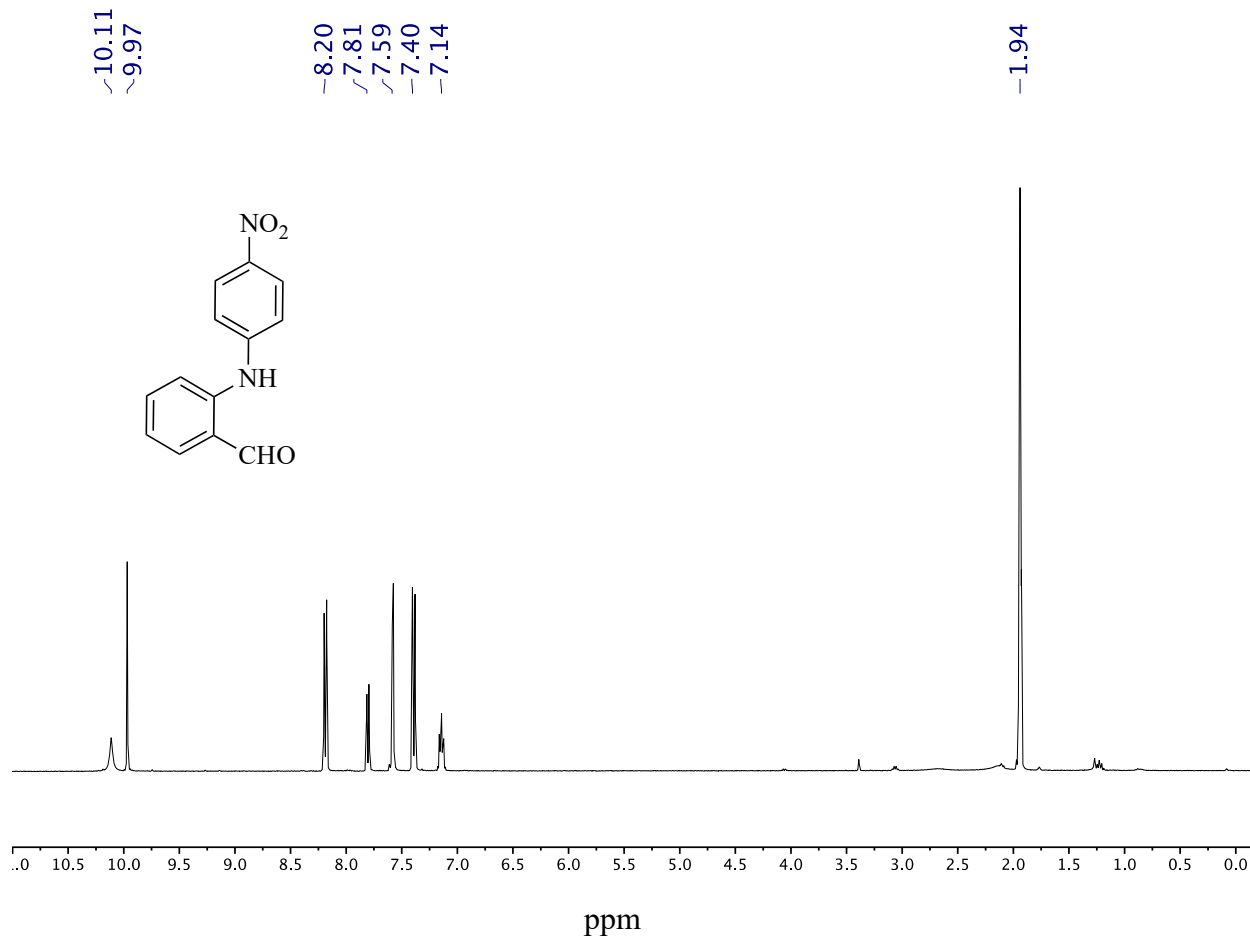

<sup>13</sup>C NMR Spectrum of **2** in CD<sub>3</sub>CN.

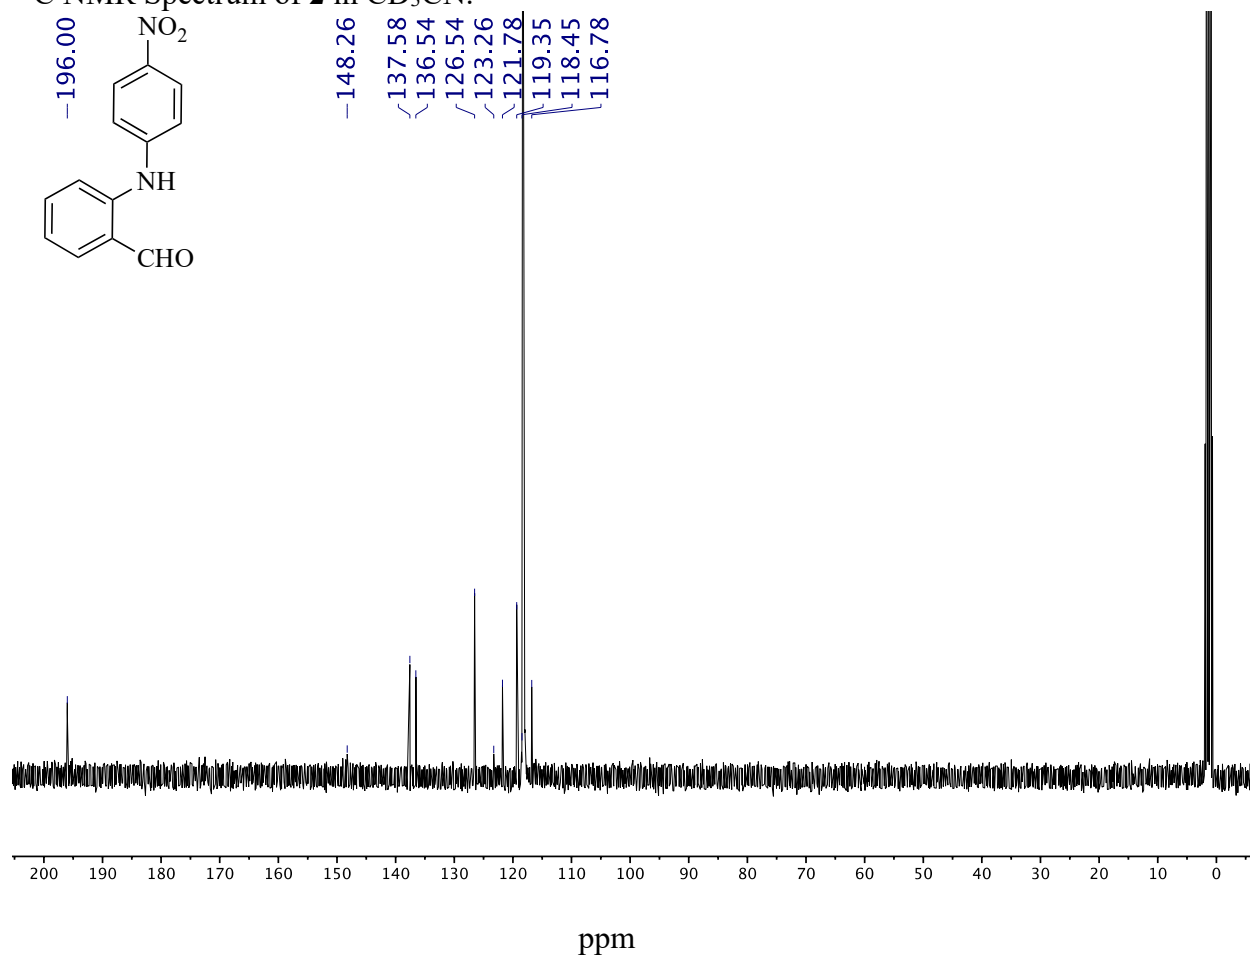

### 3. Chiroptical Sensing

All CD measurements were taken at submillimolar sensor concentrations with chiral analytes used in stoichiometric amounts in acetonitrile as the bulk sensing solvent. All CD spectra were collected with a standard sensitivity of 100 mdeg, a data pitch of 1.0 nm, a band width of 1 nm, a scanning speed of 500 nm min<sup>-1</sup> and a response of 1 s using a quartz cuvette (10 mm path length). UV-vis spectra were taken using 0.5 s integration time and scanning intervals of 1 nm using a quartz cuvette (10 mm path length). CD scans were corrected using a binomial smoothing function. The chiral substrates surveyed do not produce a CD profile above 250 nm at the experimental conditions in the absence of the sensor.

#### 3.1. Chiroptical sensing with **1**

A solution of **1** (27 mM for sensing of chiral amines and 23 mM for sensing of chiral amino alcohols) was prepared in anhydrous dichloromethane and 250 μL amounts were distributed into vials containing 750 μL of anhydrous dichloromethane to generate reaction concentrations of 6.8 mM (6.4 mM for sensing of chiral amino alcohols). Molecular sieves (4A) were added to each vial followed by equimolar amounts of the chiral substrate. The vials were sealed and placed on a shaker apparatus for 12 hours. CD and UV measurements were then taken by dispensing 20-180 μL aliquots of the imine condensation reactions into 2 mL of anhydrous acetonitrile to afford the desired sensing concentrations mentioned below.

As an example, the condensation conversion of the sensor **2** with amine **b** was monitored by NMR spectroscopy.

<sup>1</sup>H NMR Spectrum of **2** in CD<sub>3</sub>CN.

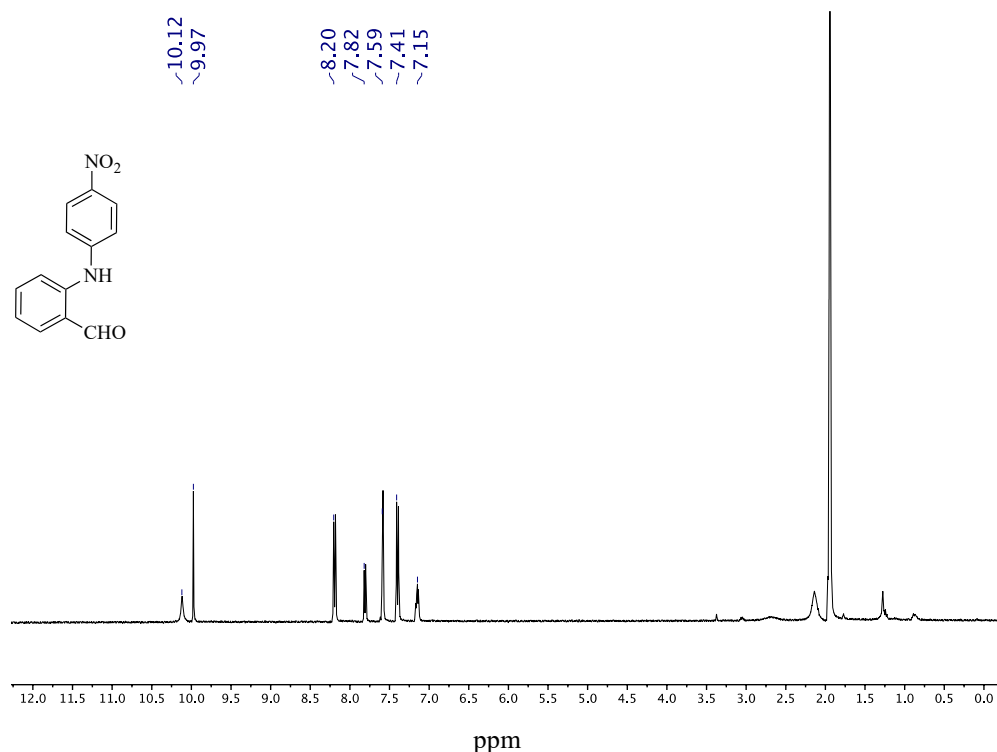

$^1\text{H}$  NMR Spectrum of **2b** in  $\text{CD}_3\text{CN}$ .

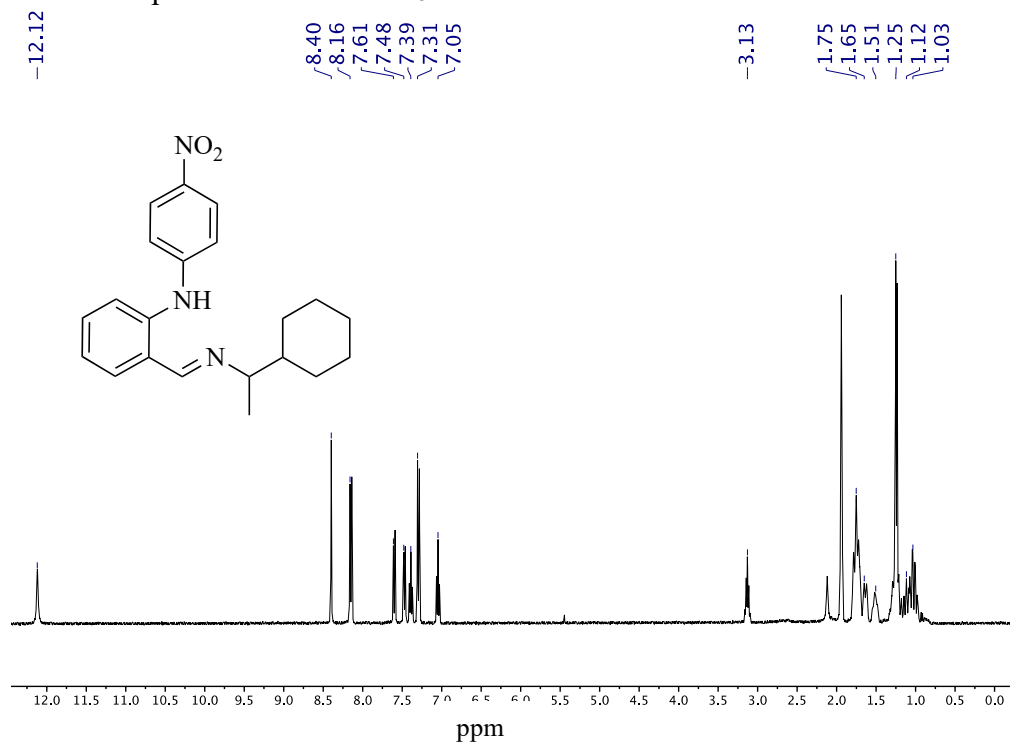

Complete condensation of **2** and analyte **b** to **2b** in  $d^3\text{-ACN}$  is evident from the disappearance of the aldehyde peak (9.97 ppm for **2**) while the signature CH imine proton of **2b** is observed as a sharp singlet at 8.40 ppm. The biarylamine NH proton in **2b** is also significantly shifted downfield to 12.12 ppm which is consistent with the expected intramolecular hydrogen bonding.

CD spectra of the imine formed from **1** with (*R*)-1-phenylethan-1-amine (blue) and (*S*)-1-phenylethan-1-amine (red) at 68  $\mu\text{M}$ .

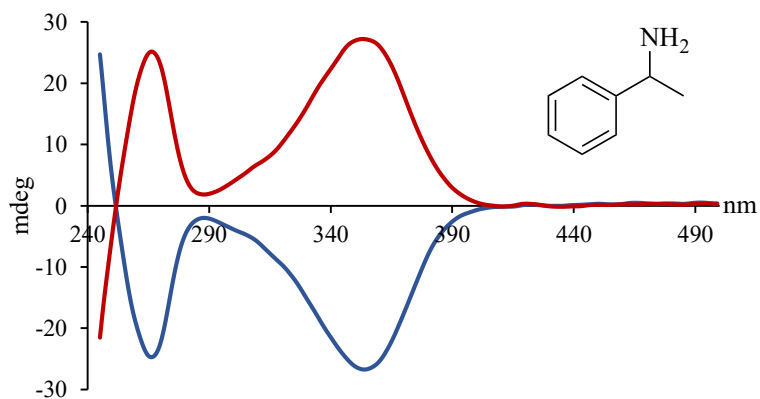



UV and ECD simulation of the four conformations of **1a**, and Boltzmann-averaged spectra  
 (relative energies are reported in the legend in kcal/mol),  
 TD-DFT CAM-B3LYP/6-311++G(2d,p) level  
 (calculated UV and ECD spectra were red-shifted by 35 nm)

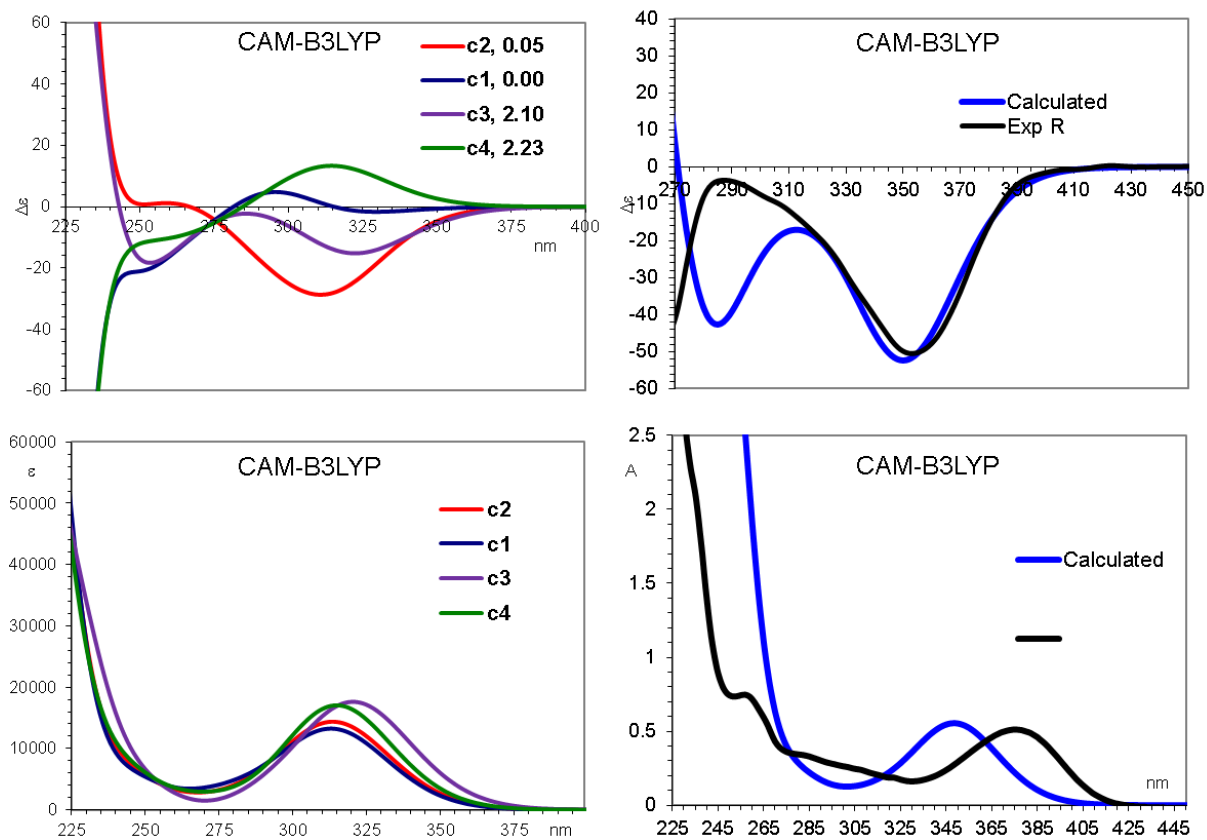

CD spectra of the imine formed from **1** with (*R*)-1-cyclohexylethan-1-amine (blue) and (*S*)-1-cyclohexylethan-1-amine (red) at 68  $\mu$ M.

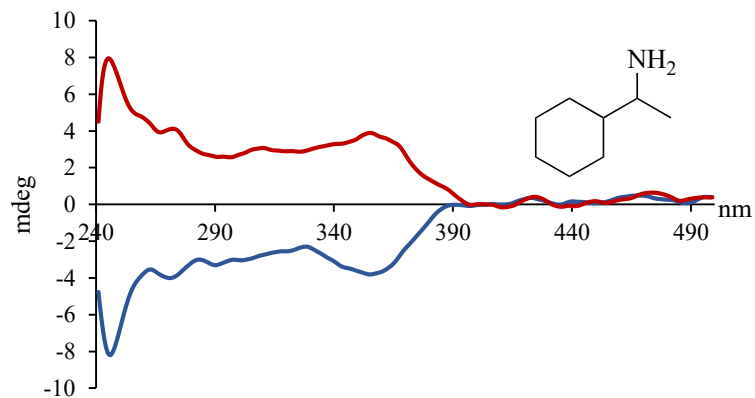

UV and ECD simulation of the four conformations of **1b**, and Boltzmann-averaged spectra  
 (relative energies are reported in the legend in kcal/mol),  
 TD-DFT CAM-B3LYP/6-311++G(2d,p) level  
 (UV and ECD spectra were red-shifted by 40 nm)

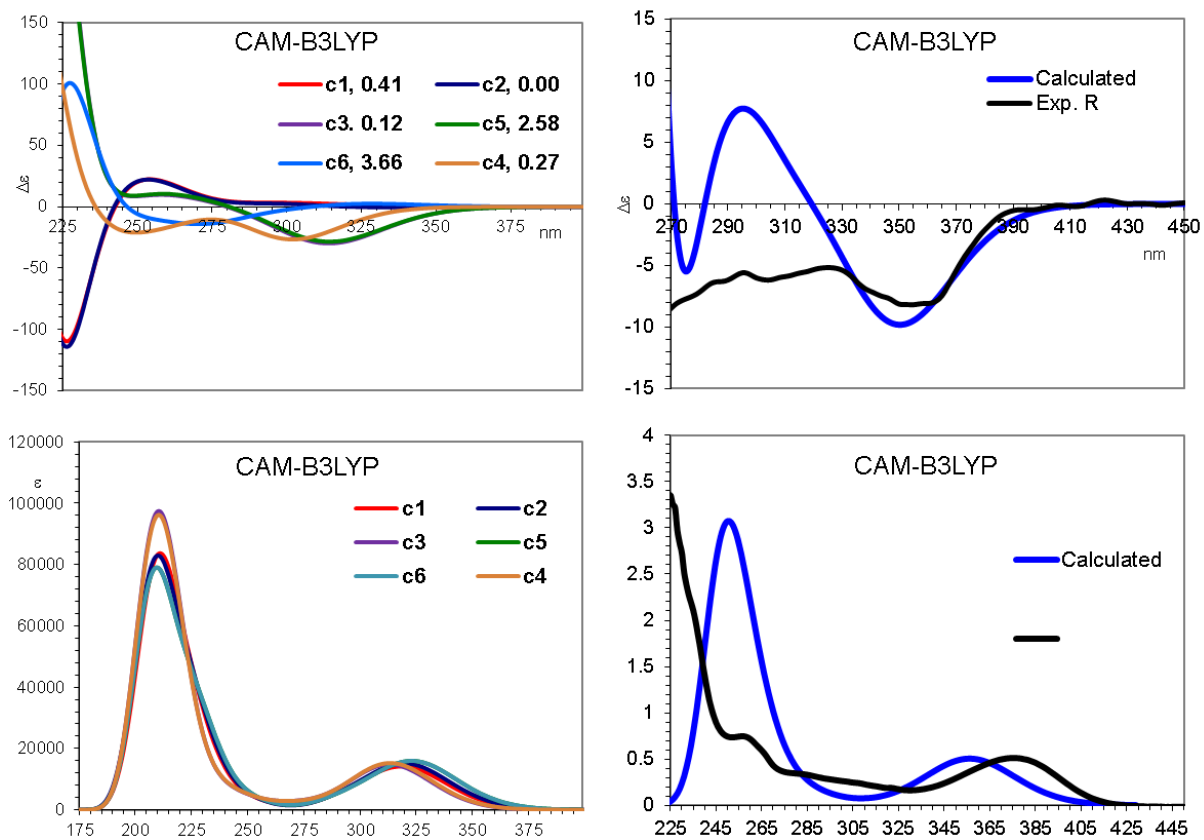

CD spectra of the imine formed from **1** with (*R*)-1-(naphthalen-1-yl)ethan-1-amine (blue) and (*S*)-1-(naphthalen-1-yl)ethan-1-amine (red) at 68  $\mu\text{M}$ .

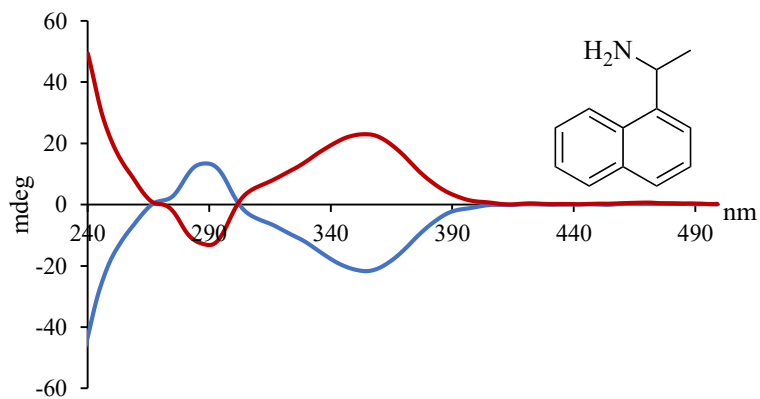

UV and ECD simulation of the four conformations of **1c**, and Boltzmann-averaged spectra  
(relative energies are reported in the legend in kcal/mol),  
TD-DFT CAM-B3LYP/6-311++G(2d,p) level  
(calculated UV and ECD spectra were red-shifted by 30nm)

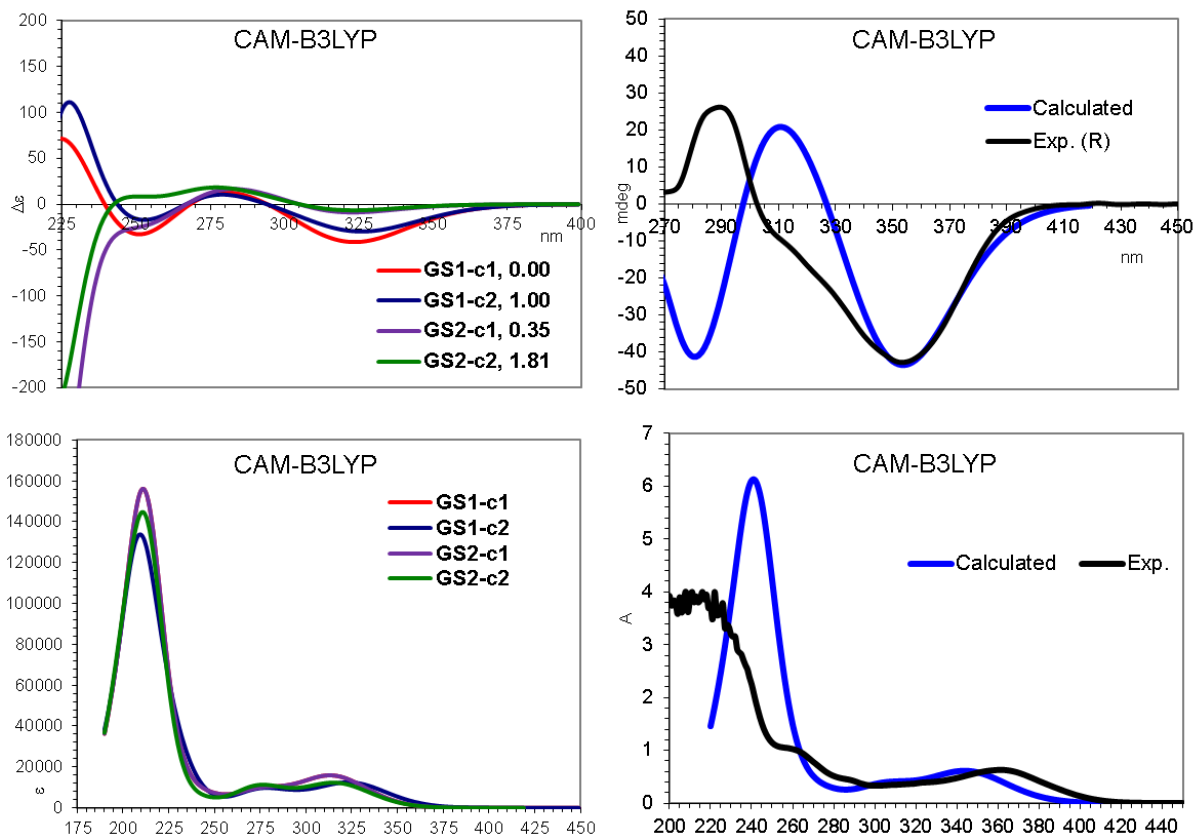

CD spectra of the imine formed from **1** with (*R*)-1-(naphthalen-2-yl)ethan-1-amine (blue) and (*S*)-1-(naphthalen-2-yl)ethan-1-amine (red) at 68  $\mu$ M.

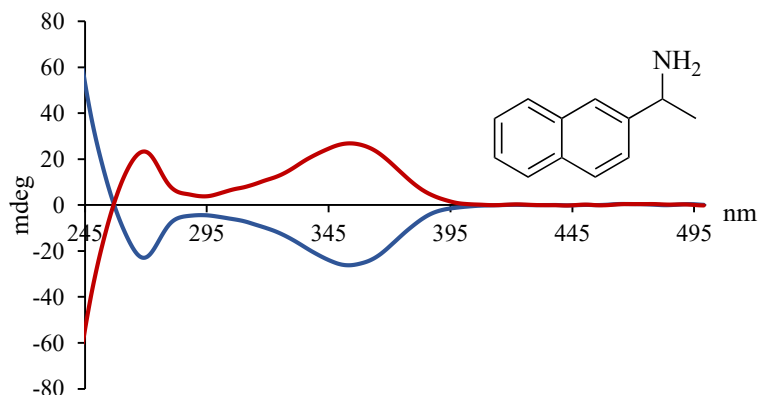

UV and ECD simulation of the four conformations of **1d**, and Boltzmann-averaged spectra (relative energies are reported in the legend in kcal/mol), TD-DFT CAM-B3LYP/6-311++G(2d,p) level (calculated UV and ECD spectra were red-shifted by 30nm)

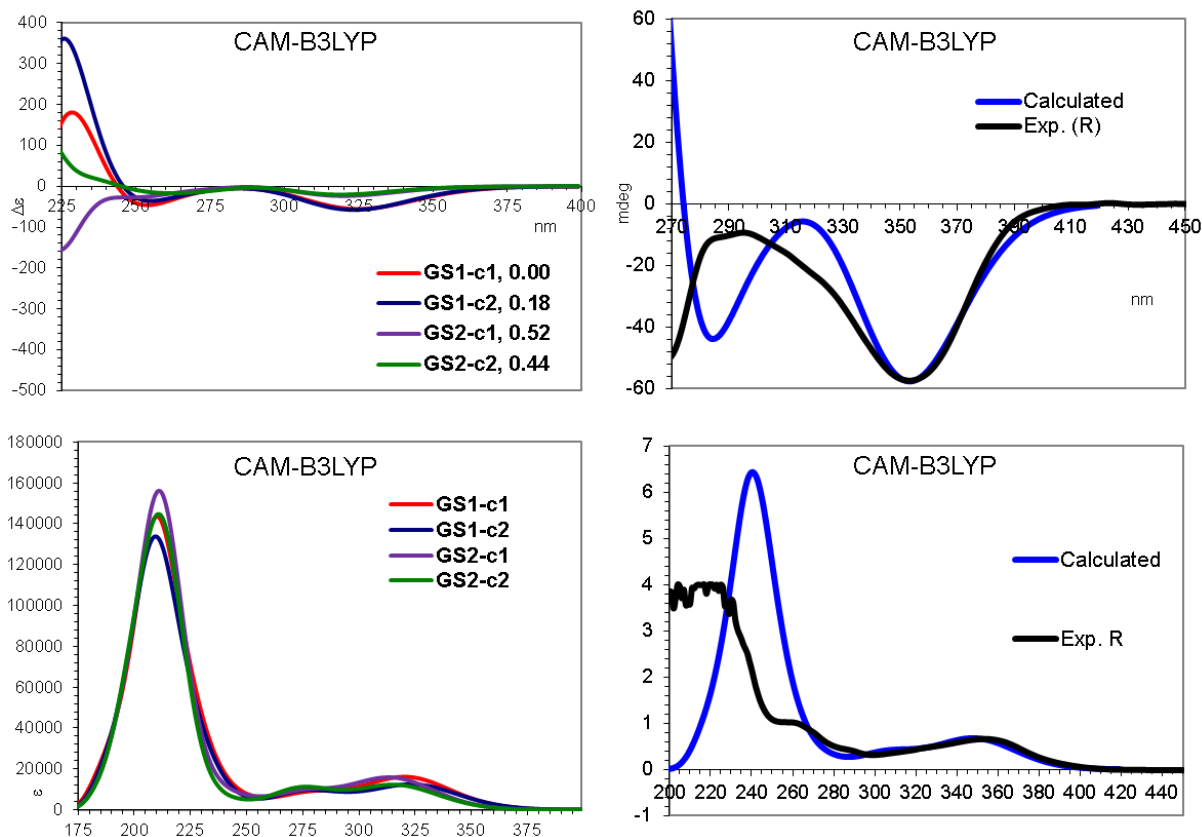

CD spectra of the imine formed from **1** with (*R*)-1-phenylpropan-1-amine (blue) and (*S*)-1-phenylpropan-1-amine (red) at 136  $\mu\text{M}$ .

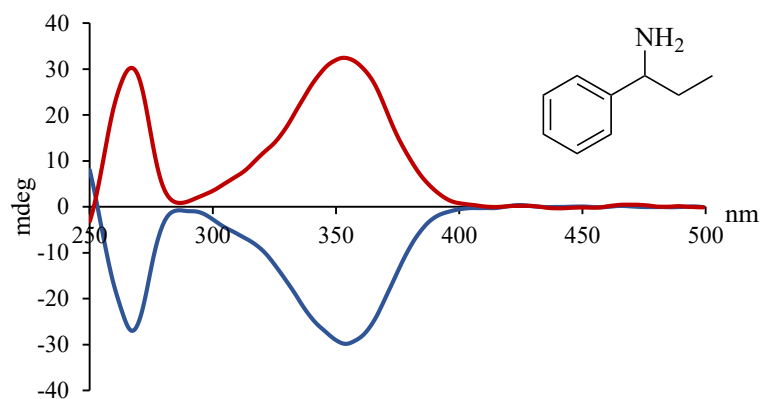

Because of the similarity to **1a**, we did not calculate the spectra for **1e**.

CD spectra of the imine formed from **1** with (*1R,2R*)-1-amino-2,3-dihydro-1*H*-inden-2-ol (blue) and (*1S,2S*)-1-amino-2,3-dihydro-1*H*-inden-2-ol (red) at 512  $\mu\text{M}$ .

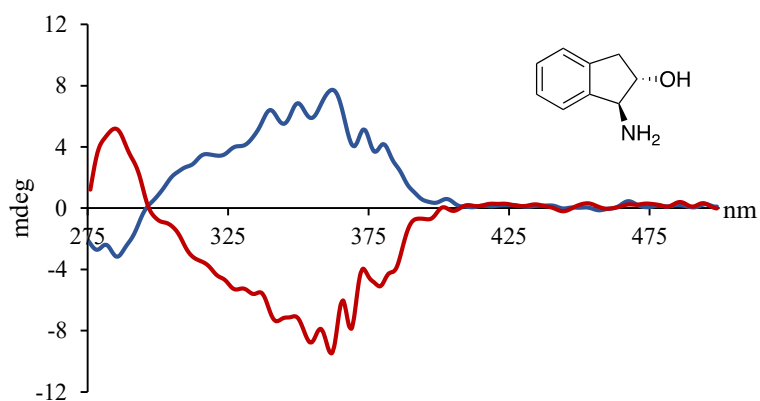

UV and ECD simulation of the four conformations of **1g**, and Boltzmann-averaged spectra  
 (relative energies are reported in the legend in kcal/mol),  
 TD-DFT CAM-B3LYP/6-311++G(2d,p) level  
 (UV and ECD spectra were red-shifted by 35 nm)

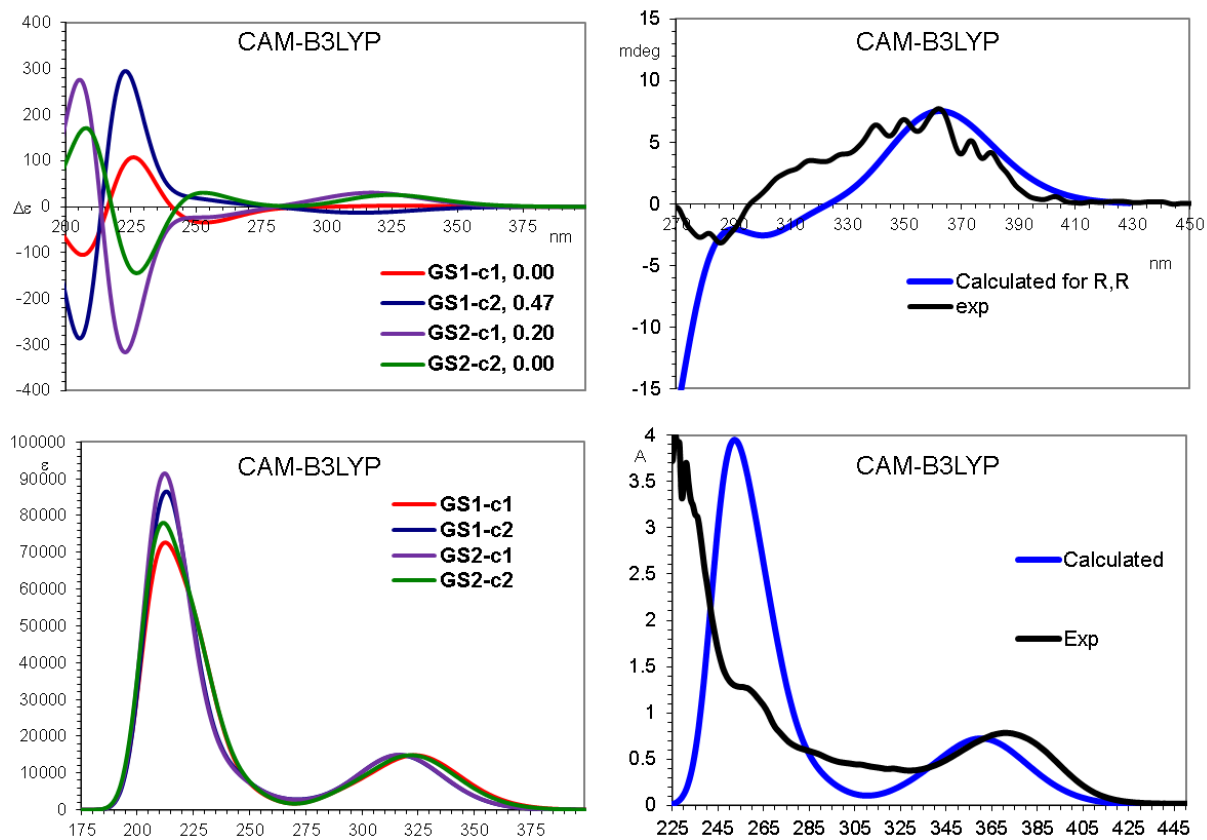

CD spectra of the imine formed from **1** with (1*R*,2*S*)-2-amino-1-phenylpropan-1-ol (blue) and (1*S*,2*R*)-2-amino-1-phenylpropan-1-ol (red) at 512  $\mu$ M.

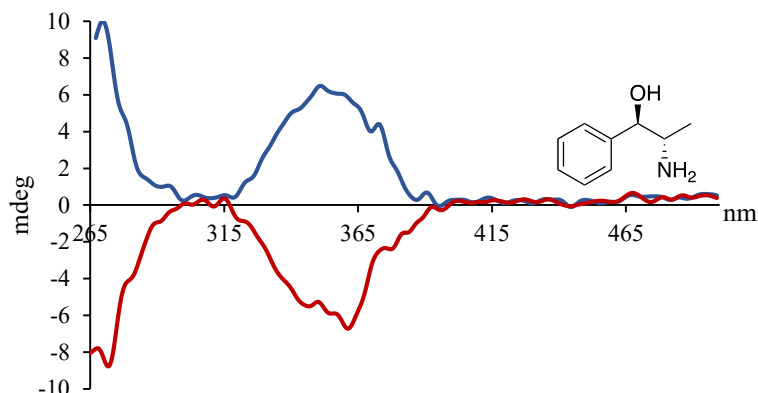

UV and ECD simulation of the four conformations of **1h**, and Boltzmann-averaged spectra (relative energies are reported in the legend in kcal/mol), TD-DFT CAM-B3LYP/6-311++G(2d,p) level (UV and ECD spectra were red-shifted by 40 nm)

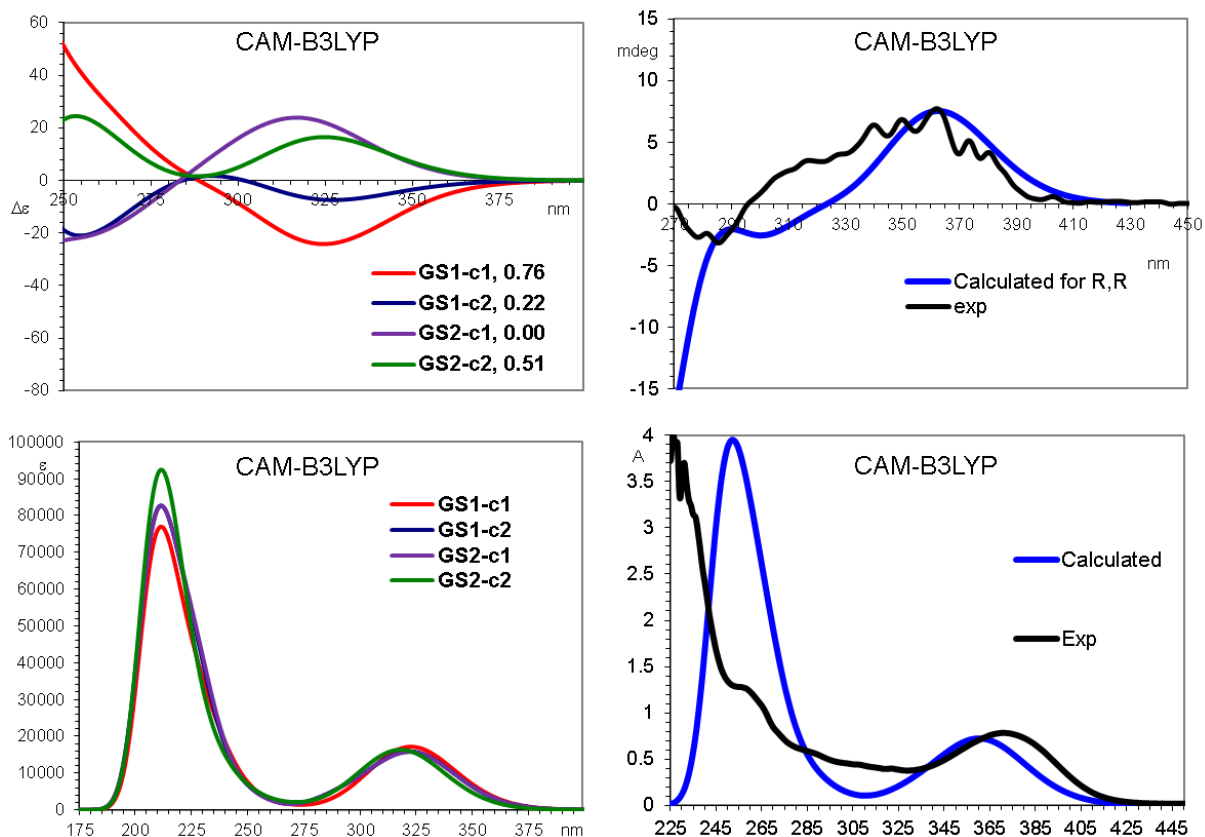

### 3.2. Chiroptical sensing with **2**

A solution of **2** (19 mM) was prepared in anhydrous acetonitrile and 250  $\mu\text{L}$  amounts were distributed into vials containing 750  $\mu\text{L}$  of anhydrous acetonitrile to generate reaction concentrations of 4.8 mM. Molecular sieves (4A) were added to each vial followed by equimolar amounts of the chiral substrate. The vials were sealed and placed on a shaker apparatus for 14 hours. CD and UV measurements were then taken by dispensing 20-180  $\mu\text{L}$  aliquots of the imine condensation reactions into 2 mL of anhydrous acetonitrile to afford the desired sensing concentrations mentioned below.

CD spectra of the imine formed from **2** with (*R*)-1,2,3,4-tetrahydronaphthalen-1-amine (blue) and (*S*)-1,2,3,4-tetrahydronaphthalen-1-amine (red) at 120  $\mu\text{M}$ .

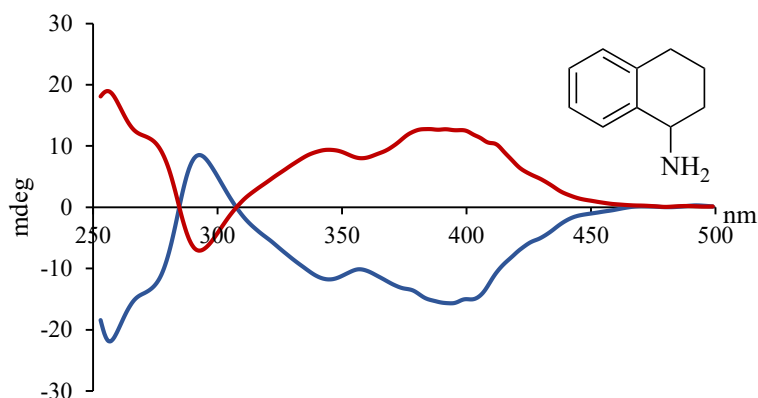

UV and ECD simulation of the four conformations of **2f**, and Boltzmann-averaged spectra (relative energies are reported in the legend in kcal/mol), TD-DFT CAM-B3LYP/6-311++G(2d,p) level (simulated UV and ECD spectra were red-shifted by 55 nm)

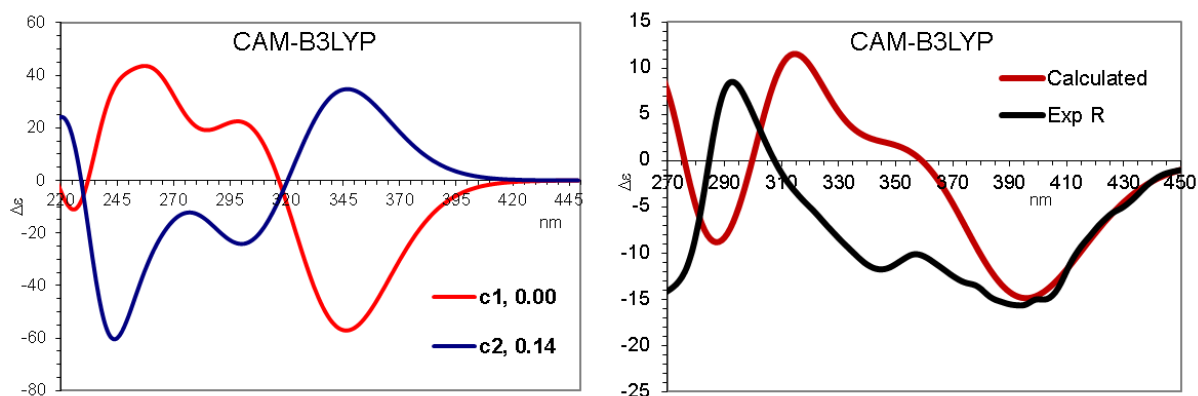



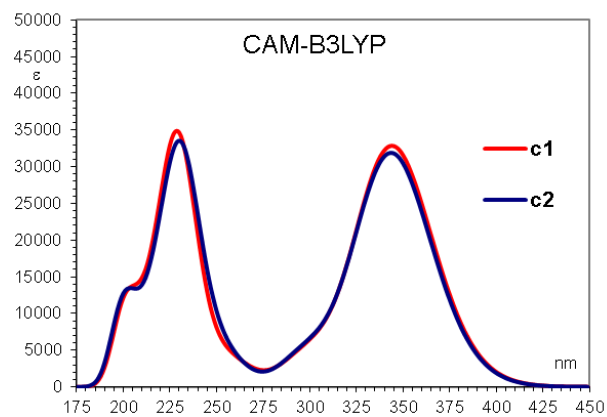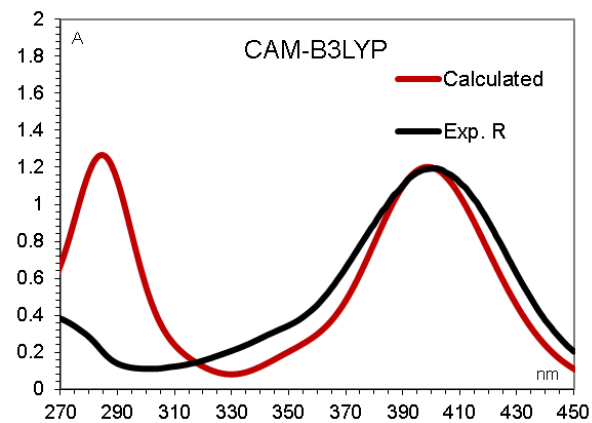

CD spectra of the imine formed from **2** with (*R*)-1-(naphthalen-1-yl)ethan-1-amine (blue) and (*S*)-1-(naphthalen-1-yl)ethan-1-amine (red) at 120  $\mu$ M.

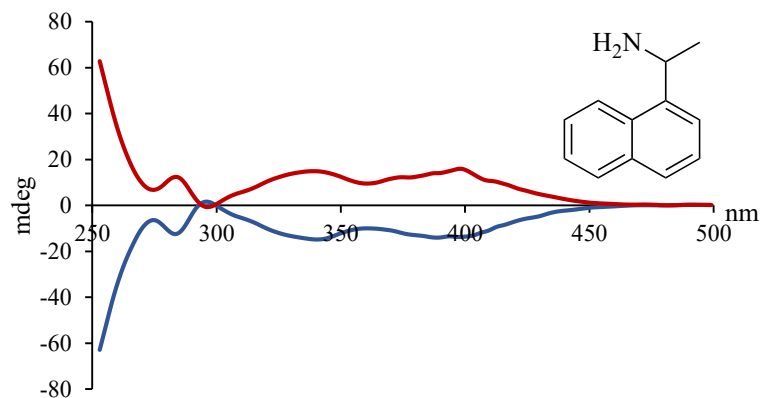

CD spectra of the imine formed from **2** with (*R*)-1-(naphthalen-2-yl)ethan-1-amine (blue) and (*S*)-1-(naphthalen-2-yl)ethan-1-amine (red) at 96  $\mu$ M.

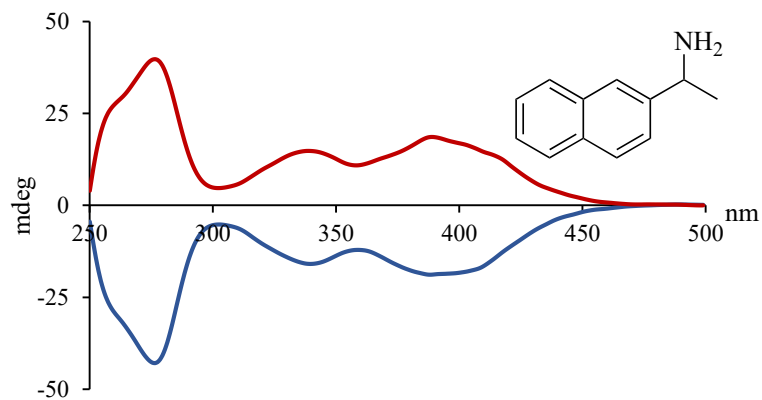

A solution of **2** (24 mM) was prepared in anhydrous acetonitrile and 500  $\mu\text{L}$  amounts were distributed into vials containing 500  $\mu\text{L}$  of anhydrous acetonitrile to generate reaction concentrations of 12 mM. Molecular sieves (4A) were added to each vial followed by equimolar amounts of the chiral substrate. The vials were sealed and placed on a shaker apparatus for 14 hours. CD and UV measurements were then taken by dispensing 20-180  $\mu\text{L}$  aliquots of the imine condensation reactions into 2 mL of anhydrous acetonitrile to afford the desired sensing concentrations mentioned below.

CD spectra of the imine formed from **2** with (*R*)-1-phenylethan-1-amine (blue) and (*S*)-1-phenylethan-1-amine (red) at 60  $\mu\text{M}$ .

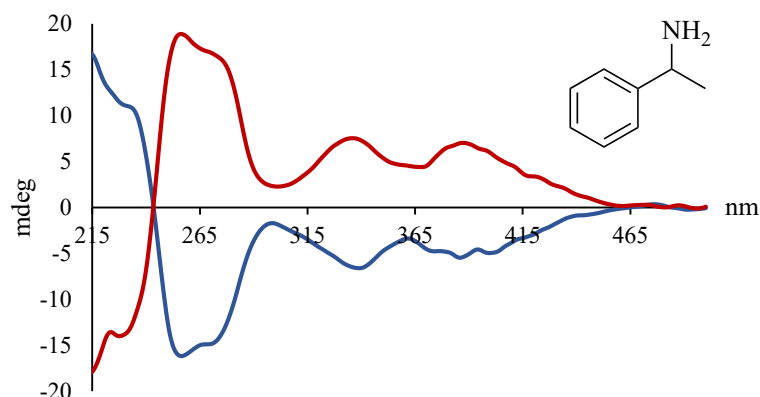

CD spectra of the imine formed from **2** with (*R*)-1-cyclohexylethan-1-amine (blue) and (*S*)-1-cyclohexylethan-1-amine (red) at 90  $\mu\text{M}$ .

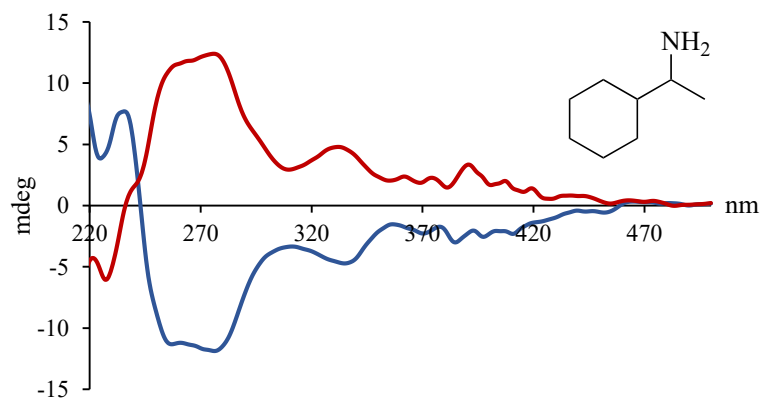

## 4. UV Analysis

### 4.1 UV Spectra of the Imines Formed with **1**

All solutions prepared according to SI protocol in **3** described above.

UV spectrum of **1** (68  $\mu\text{M}$ ) in acetonitrile (local  $\lambda_{\text{max}}=353$  nm).

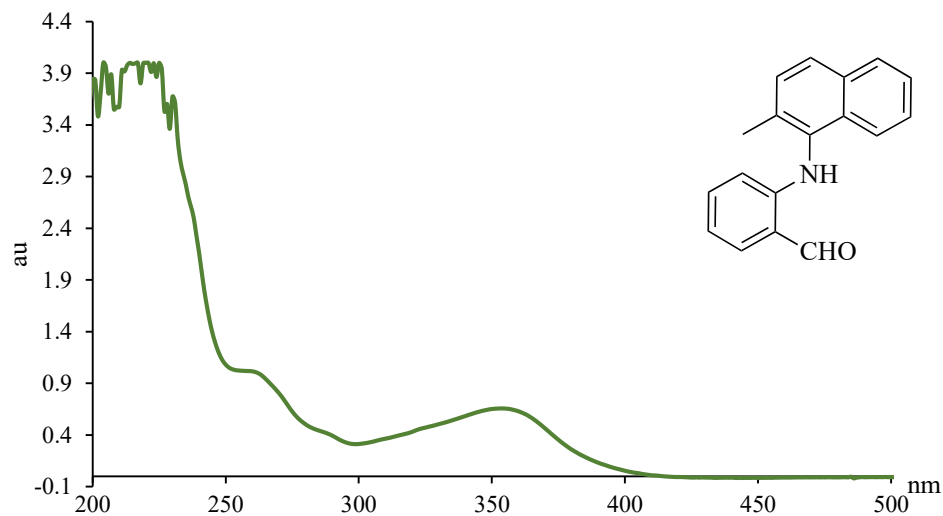

UV spectrum of **1** (green) and the imine formed from **1** (68  $\mu\text{M}$ ) and (*R*)-1-phenylpropan-1-amine (blue) in acetonitrile (local  $\lambda_{\text{max}}=360$  nm).

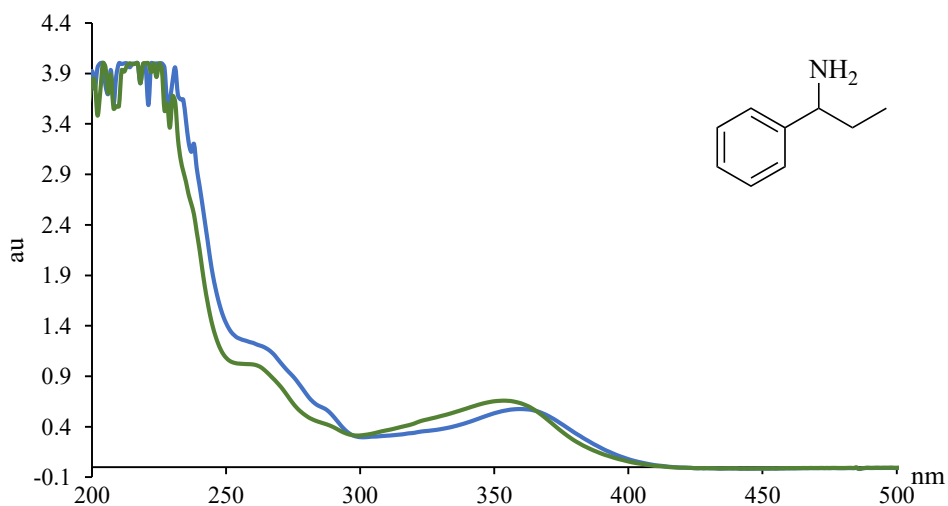

UV spectrum of **1** (green) and the imine formed from **1** (68  $\mu\text{M}$ ) and (*R*)-1-(naphthalen-1-yl)ethan-1-amine (blue) in acetonitrile (local  $\lambda_{\text{max}}$ =361 nm).

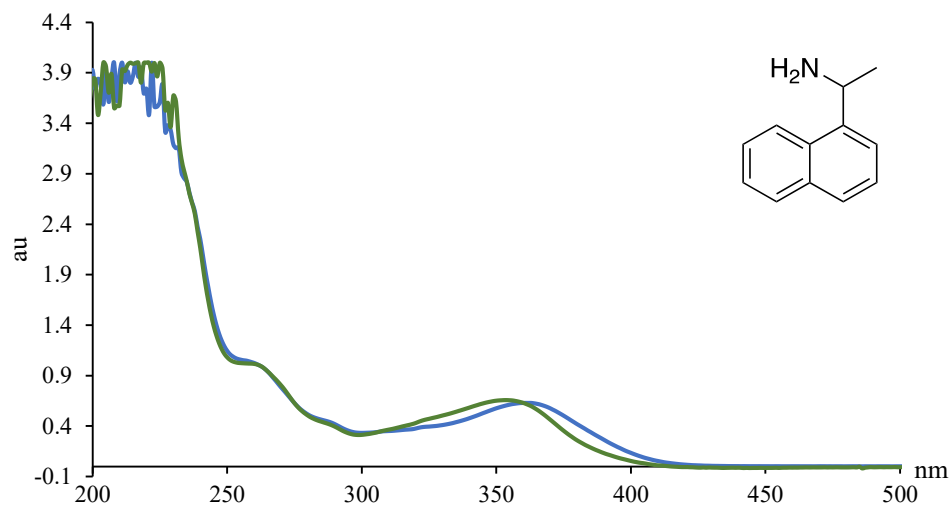

UV spectrum of **1** (green) and the imine formed from **1** (68  $\mu\text{M}$ ) and (*R*)-1-(naphthalen-2-yl)ethan-1-amine (blue) in acetonitrile (local  $\lambda_{\text{max}}$ =354 nm).

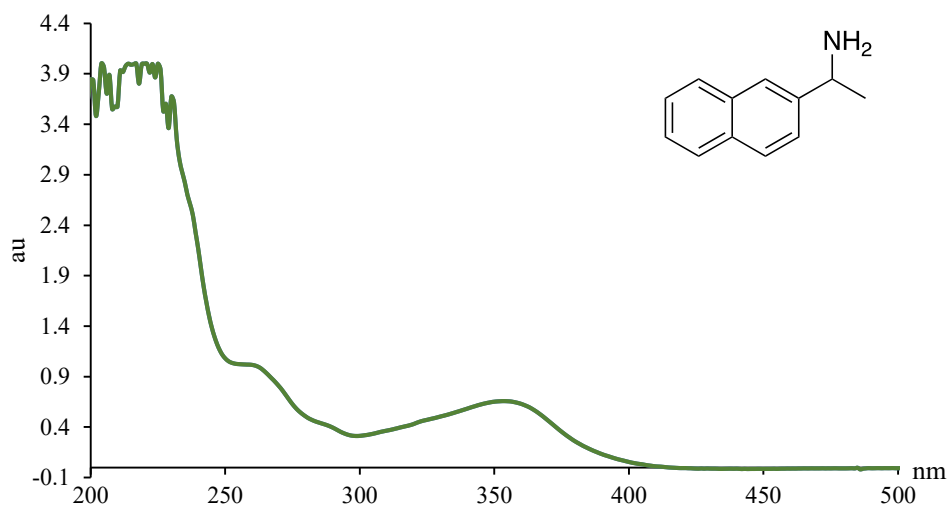

UV spectrum of **1** (green) and the imine formed from **1** (68  $\mu\text{M}$ ) and (*R*)-1-phenylethan-1-amine (blue) in acetonitrile (local  $\lambda_{\text{max}}=376$  nm).

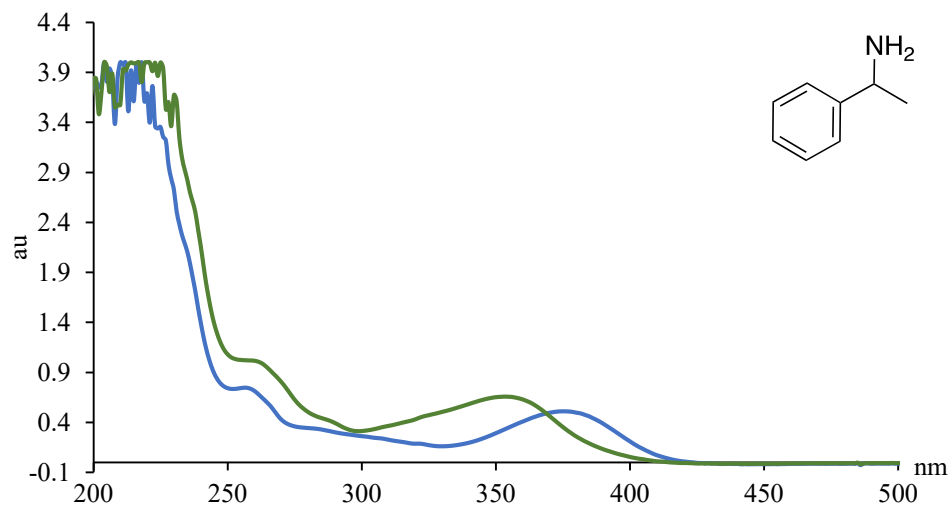

UV spectrum of **1** (green) and the imine formed from **1** (68  $\mu\text{M}$ ) and (*R*)-1-cyclohexylethan-1-amine (blue) in acetonitrile (local  $\lambda_{\text{max}}=376$  nm).

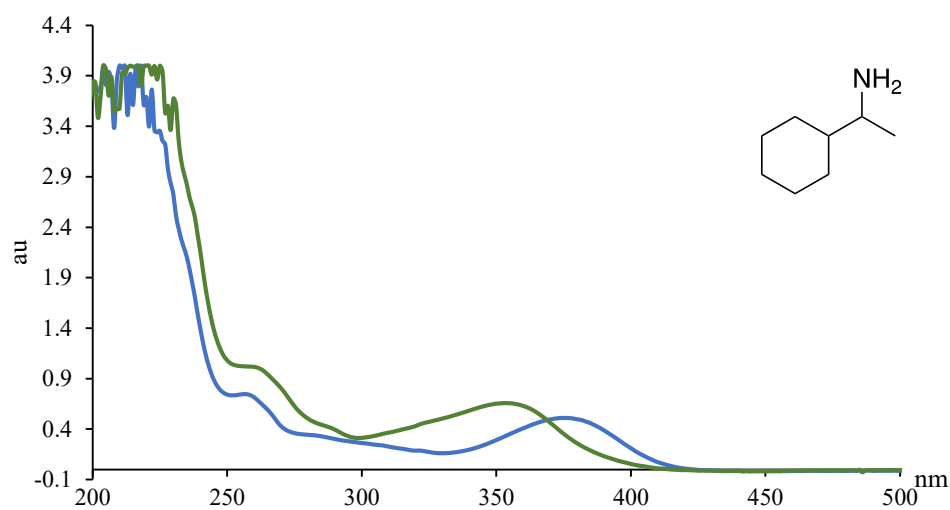

UV spectrum of **1** (68  $\mu\text{M}$ ) (green) and the imine formed from **1** (64  $\mu\text{M}$ ) and (1*R*,2*R*)-1-amino-2,3-dihydro-1*H*-inden-2-ol (blue) in acetonitrile (local  $\lambda_{\text{max}}=371$  nm).

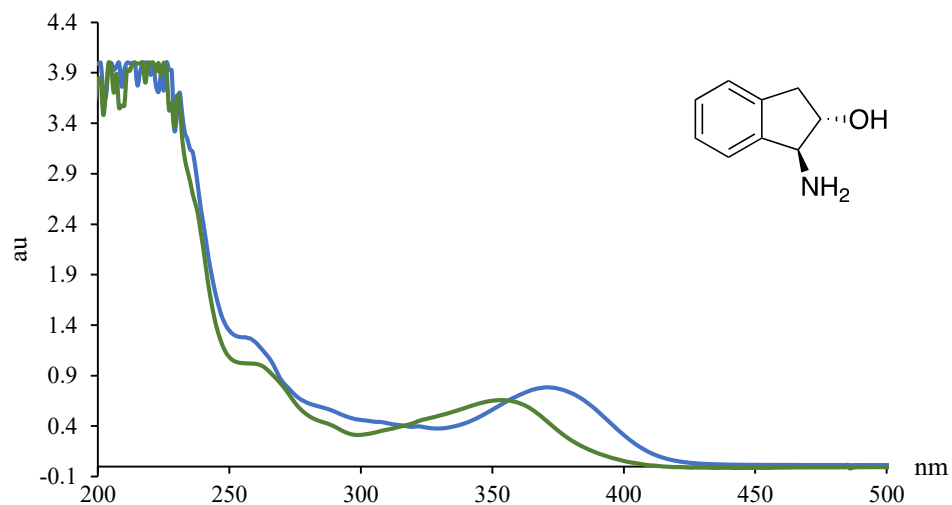

#### 4.2 UV Spectra of the Imines Formed with **2**

UV spectrum of **2** (48  $\mu\text{M}$ ) in acetonitrile (local  $\lambda_{\text{max}}=391$  nm).

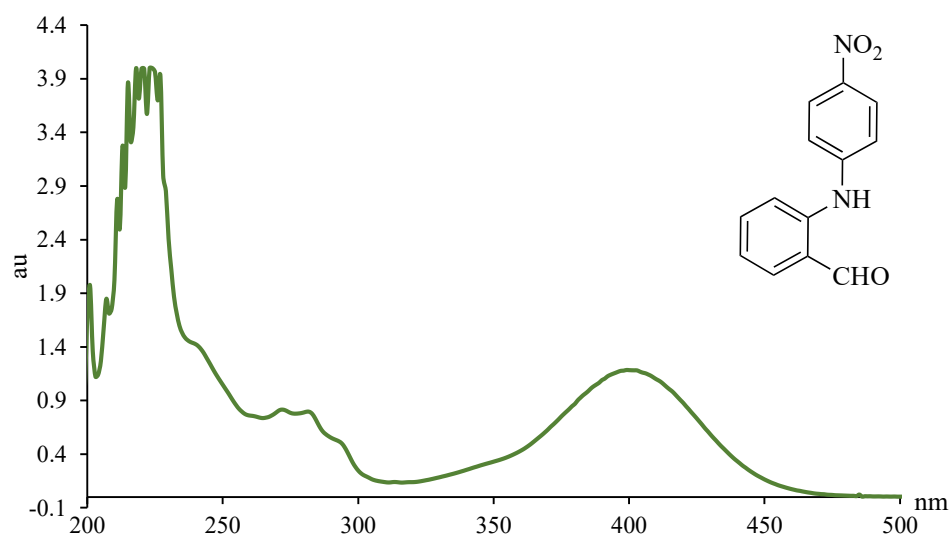

UV spectrum of **2** (48  $\mu\text{M}$ ) (green) and of the imine formed from **2** (60  $\mu\text{M}$ ) and (*S*)-1-phenylethan-1-amine (blue) in acetonitrile (local  $\lambda_{\text{max}}=400$  nm).

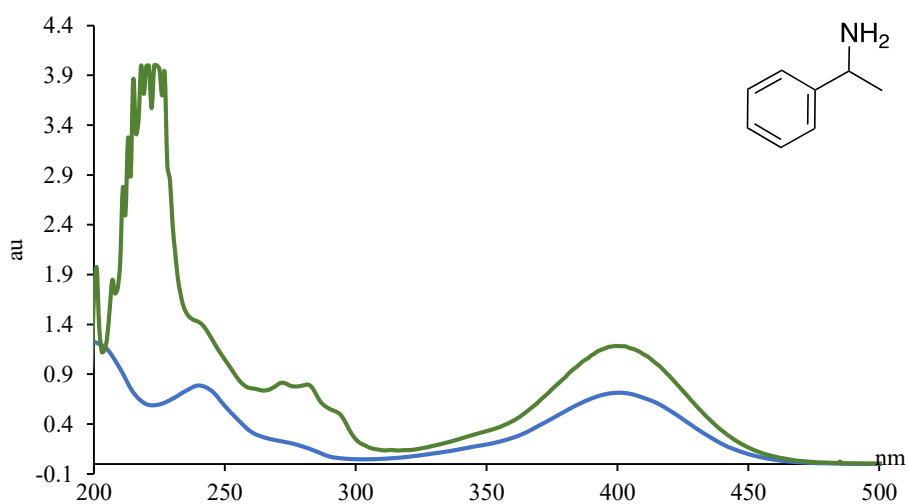

UV spectrum of **2** (48  $\mu\text{M}$ ) (green) and of the imine formed from **2** (60  $\mu\text{M}$ ) and (*S*)-1-cyclohexylethan-1-amine in acetonitrile (local  $\lambda_{\text{max}}=400$  nm).

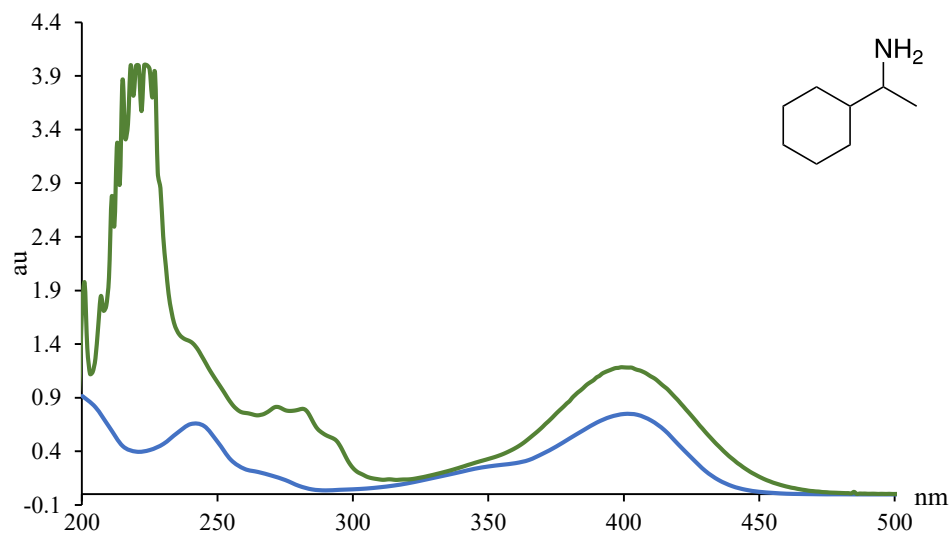

UV spectrum of **2** (48  $\mu\text{M}$ ) (green) and of the imine formed from **2** (48  $\mu\text{M}$ ) and (*R*)-1,2,3,4-tetrahydronaphthalen-1-amine (blue) in acetonitrile (local  $\lambda_{\text{max}}$ =402 nm).

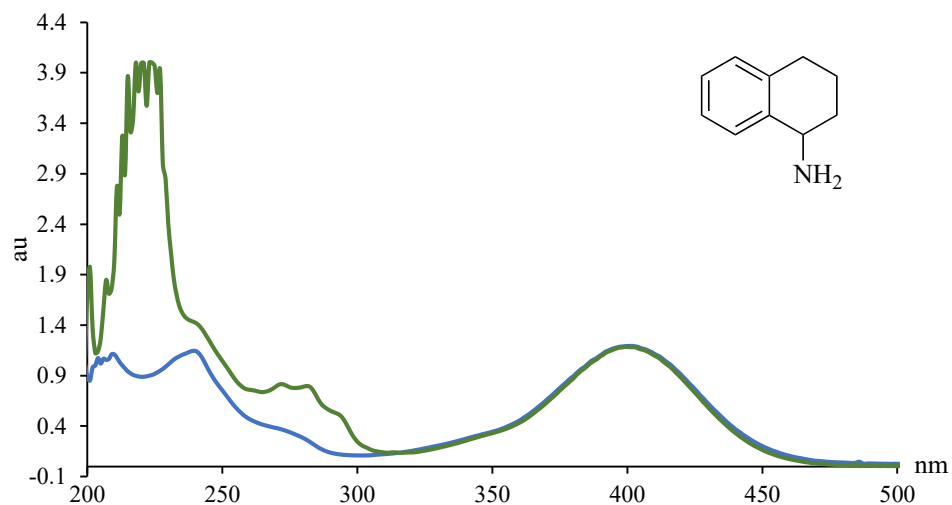

UV spectrum of **2** (48  $\mu\text{M}$ ) (green) and of the imine formed from **2** (48  $\mu\text{M}$ ) and (*S*)-1-phenylpropan-1-amine (blue) in acetonitrile (local  $\lambda_{\text{max}}$ =399 nm).

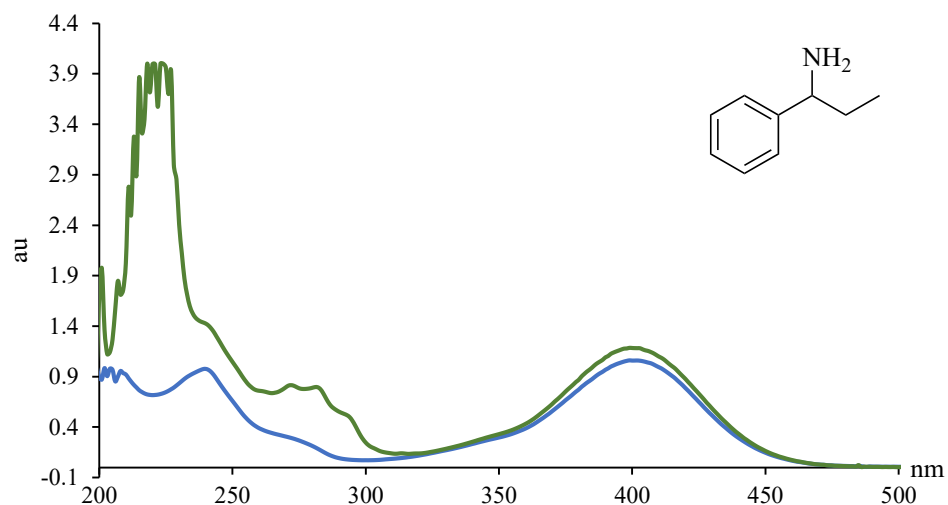



UV spectrum of **2** (48  $\mu\text{M}$ ) (green) and of the imine formed from **2** (48  $\mu\text{M}$ ) and (*R*)-1-(naphthalen-1-yl)ethan-1-amine (blue) in acetonitrile (local  $\lambda_{\text{max}}=402$  nm).

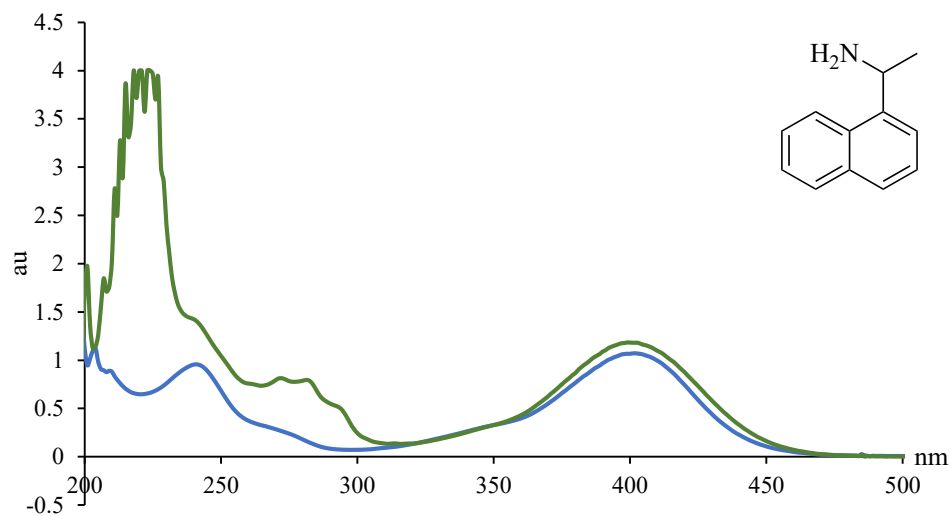

UV spectrum of **2** (48  $\mu\text{M}$ ) (green) and of imine formed from **2** (48  $\mu\text{M}$ ) and (*R*)-1-(naphthalen-2-yl)ethan-1-amine in acetonitrile (local  $\lambda_{\text{max}}=402$  nm).

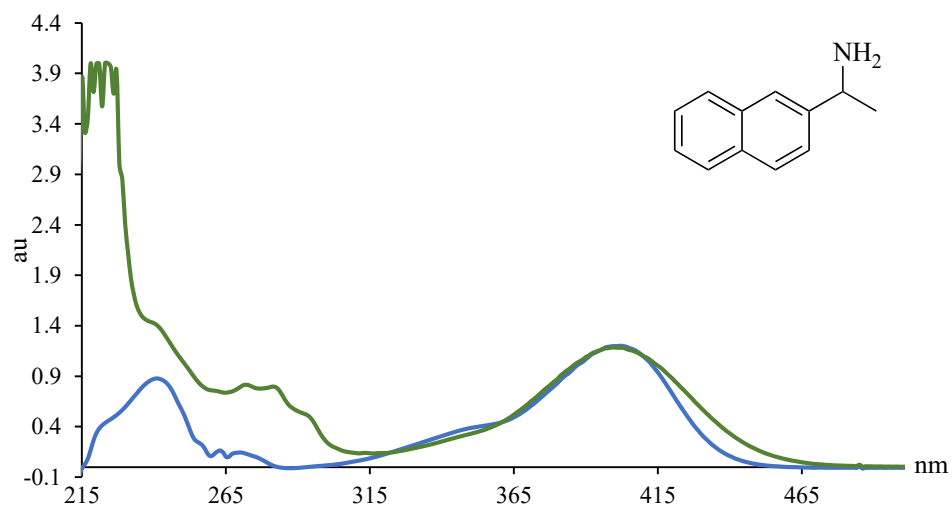

## 5. Quantitative Ee Determination

A solution of **1** (19.6 mM) was prepared in anhydrous dichloromethane and 250  $\mu\text{L}$  amounts were distributed into vials containing 750  $\mu\text{L}$  of anhydrous dichloromethane to generate reaction concentrations of 4.9 mM. Molecular sieves (4 $\text{\AA}$ ) were added to each vial followed by equimolar amounts of 1-phenylpropan-1-amine with varied *ee* values (100, 80, 60, 40, 20, 0, -20, -40, -60, -80, -100 %*ee*). The vials were sealed and placed on a shaker apparatus for 12 hours. CD and UV measurements were then taken by dispensing 100  $\mu\text{L}$  aliquots of the imine condensation reactions into 2 mL of anhydrous acetonitrile to afford an *ee* calibration curve. A second set of imine condensation reactions were prepared following the same procedure described using random *ee* mixtures of the same amine (87, 76, -64, -89 %*ee*).

Calibration curve of the chiroptical responses of **1** with varied enantiomeric compositions of 1-phenylpropan-1-amine.

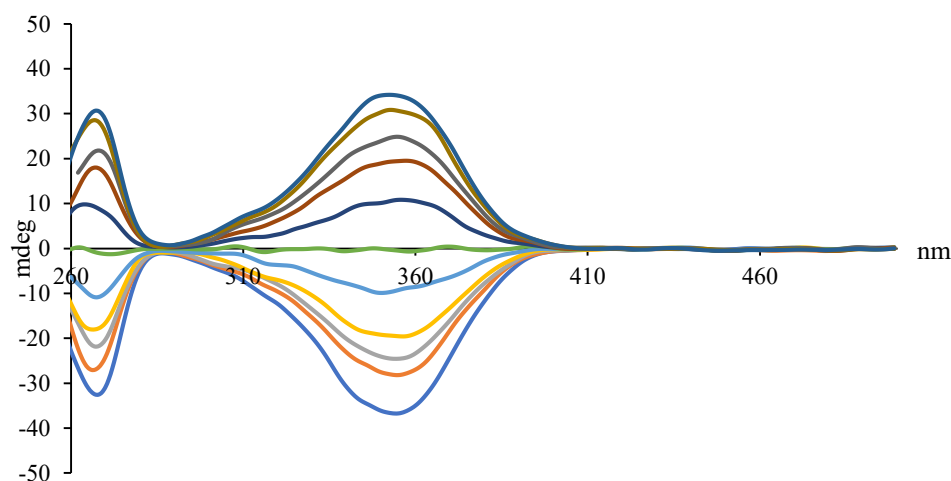

Correlation of the chiroptical responses of **1** (blue) at 354 nm to the *ee*'s of the scalemic samples and random *ee* compositions of 1-phenylpropan-1-amine (orange) for enantiomeric determination using calibration curve fitting.

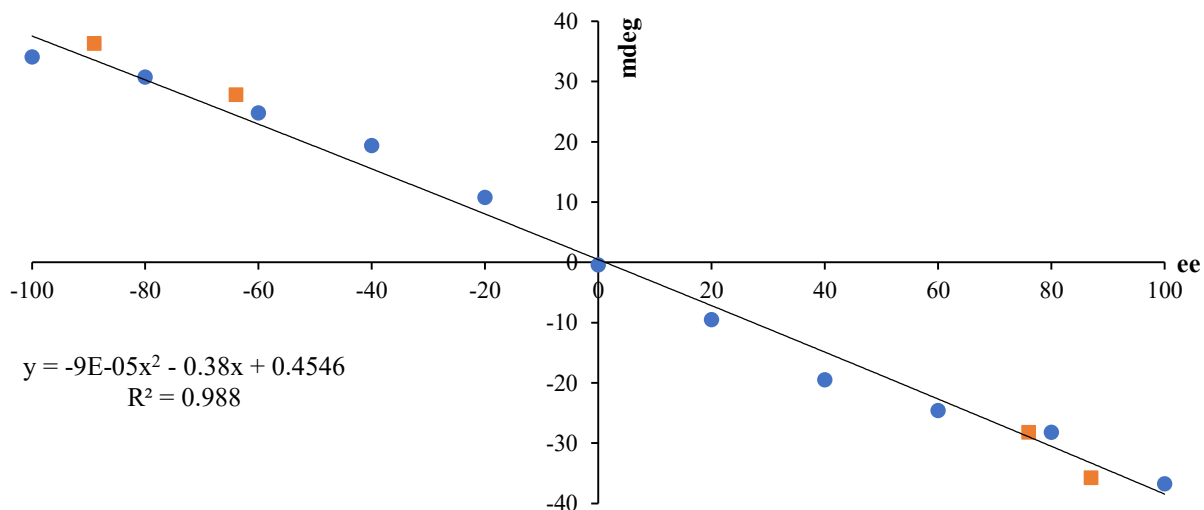

Comparison of *ee* values of the randomly prepared enantiomeric mixtures of 1-phenylpropan-1-amine with the CD sensing results.

| Sample composition     |                  | Chiroptical sensing results |                  |
|------------------------|------------------|-----------------------------|------------------|
| Absolute configuration | Actual <i>ee</i> | Absolute configuration      | <i>Ee</i> values |
| <i>S</i>               | 87               | <i>S</i>                    | 93               |
| <i>S</i>               | 76               | <i>S</i>                    | 74               |
| <i>R</i>               | 64               | <i>R</i>                    | 73               |
| <i>R</i>               | 89               | <i>R</i>                    | 97               |

### 6. Crystallographic Analysis

A single crystal of the imine formed from **2** and (*S*)-1-phenylethan-1-amine was obtained by slow evaporation of a solution in methanol. Single crystal X-ray analysis was performed at 100 K using a Bruker Apex DUO equipped with an APEXII CCD detector with a multi-layer mirror monochromated Cu-K $\alpha$  I $\mu$ S radiation ( $\lambda = 1.54178 \text{ \AA}$ ). Data were integrated and corrected using the SAINT v8.37A and SADABS v2016/2 software within APEX 3. The structures were solved by direct methods and refined with full-matrix least-square analysis using SHELX-2018-1 software. Non-hydrogen atoms were refined with anisotropic displacement parameters. Crystal data: C<sub>21</sub>H<sub>19</sub>N<sub>3</sub>O<sub>2</sub>, *M* = 345.39, yellow column, 0.212 x 0.118 x 0.056 mm<sup>3</sup>, orthorhombic, space group *P*2<sub>1</sub>2<sub>1</sub>2<sub>1</sub> *a* = 7.6371(4), *b* = 14.5261(8), *c* = 16.1757(8)  $\text{\AA}$ , *V* = 1794.49(16)  $\text{\AA}^3$ , *Z* = 4.

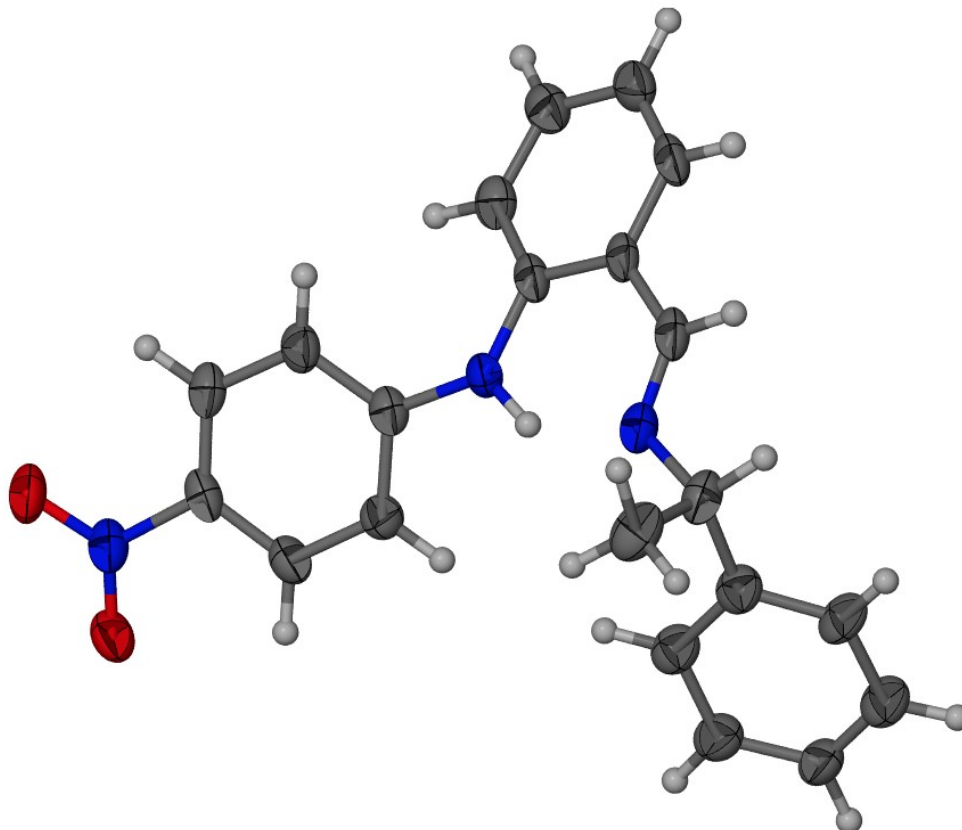

## 7. Computational Data

### Compound 1a, conformation c1

|   |             |             |             |
|---|-------------|-------------|-------------|
| C | -0.15001300 | 3.93357100  | -0.62510100 |
| C | -0.28703900 | 2.58803200  | -0.23474700 |
| C | 0.79735700  | 1.68474600  | -0.47152800 |
| C | 1.95518700  | 2.18104400  | -1.11025000 |
| C | 2.04892800  | 3.51535800  | -1.47952800 |
| C | 0.99860100  | 4.41122500  | -1.23746400 |
| N | 0.69065600  | 0.37227100  | -0.07520100 |
| C | 1.61133200  | -0.66644600 | -0.39752000 |
| C | 2.81063900  | -0.80969100 | 0.37164000  |
| C | 3.71624100  | -1.87379300 | 0.05338700  |
| C | 3.38165200  | -2.76619400 | -0.99713800 |
| C | 2.21114400  | -2.61320600 | -1.70091300 |
| C | 1.30537100  | -1.55601000 | -1.42054400 |
| C | 3.13448700  | 0.06017300  | 1.44856900  |
| C | 4.30135800  | -0.10423000 | 2.16095500  |
| C | 5.20401900  | -1.14591300 | 1.83601600  |
| C | 4.91334500  | -2.01127500 | 0.80661800  |
| C | 0.03899800  | -1.40814600 | -2.23127500 |
| C | -1.55176800 | 2.18793900  | 0.37020200  |
| N | -1.84291500 | 1.00450800  | 0.77592900  |
| C | -3.16622900 | 0.77828700  | 1.35651900  |
| C | -3.00984500 | 0.45458400  | 2.85368600  |
| C | -3.88048300 | -0.34170800 | 0.60857900  |
| C | -3.28972600 | -1.60532000 | 0.46340000  |
| C | -3.95667300 | -2.63070600 | -0.20617100 |
| C | -5.22859400 | -2.41048100 | -0.74152900 |
| C | -5.82500900 | -1.15765400 | -0.60287300 |
| C | -5.15195700 | -0.13198500 | 0.06565800  |
| H | -2.29122300 | 3.00094500  | 0.45889300  |
| H | -0.98407600 | 4.60719000  | -0.43777200 |
| H | 2.77727700  | 1.50245600  | -1.30895000 |
| H | 2.95619100  | 3.86366500  | -1.96709500 |
| H | 1.07955300  | 5.45399900  | -1.52786600 |
| H | -0.23665400 | 0.11967200  | 0.27514700  |
| H | 4.06545500  | -3.57715900 | -1.23674100 |
| H | 1.96845700  | -3.30602800 | -2.50306300 |
| H | 2.44003900  | 0.85322400  | 1.70286800  |
| H | 4.53178500  | 0.56883600  | 2.98258700  |
| H | 6.12218900  | -1.26192400 | 2.40558300  |
| H | 5.59601800  | -2.81970700 | 0.55479200  |
| H | 0.03306400  | -2.10617100 | -3.07407100 |
| H | -0.85917900 | -1.60331800 | -1.63182600 |
| H | -0.06419600 | -0.39200700 | -2.62756100 |
| H | -3.78151400 | 1.69029500  | 1.26785600  |
| H | -3.98768000 | 0.26006500  | 3.30714800  |
| H | -2.38120000 | -0.43044000 | 2.99464600  |
| H | -2.53923300 | 1.29413300  | 3.37686400  |
| H | -2.30068800 | -1.78492100 | 0.87614900  |
| H | -3.48406500 | -3.60429100 | -0.30877700 |
| H | -5.74829100 | -3.20978900 | -1.26313600 |
| H | -6.81284700 | -0.97392100 | -1.01756600 |
| H | -5.62130200 | 0.84453200  | 0.16492200  |

### Compound 1a, conformation c2

|   |             |             |             |
|---|-------------|-------------|-------------|
| C | -0.15035700 | 3.93358300  | -0.62491800 |
| C | -0.28725800 | 2.58800100  | -0.23465400 |
| C | 0.79717300  | 1.68480800  | -0.47160700 |
| C | 1.95491500  | 2.18122800  | -1.11039400 |
| C | 2.04853800  | 3.51557600  | -1.47957100 |
| C | 0.99817100  | 4.41135800  | -1.23733900 |
| N | 0.69057300  | 0.37227200  | -0.07545700 |
| C | 1.61142500  | -0.66632100 | -0.39776100 |
| C | 2.81057700  | -0.80960100 | 0.37163900  |
| C | 3.71629500  | -1.87360300 | 0.05343100  |
| C | 3.38198600  | -2.76587000 | -0.99730400 |
| C | 2.21163200  | -2.61284800 | -1.70131700 |
| C | 1.30572400  | -1.55574200 | -1.42097400 |
| C | 3.13415100  | 0.06013600  | 1.44876100  |
| C | 4.30087200  | -0.10431300 | 2.16137300  |
| C | 5.20365500  | -1.14591700 | 1.83648600  |
| C | 4.91324600  | -2.01114200 | 0.80690400  |
| C | 0.03948500  | -1.40791300 | -2.23190800 |
| C | -1.55190200 | 2.18778100  | 0.37039800  |
| N | -1.84284200 | 1.00433800  | 0.77623500  |
| C | -3.16614900 | 0.77794800  | 1.35685300  |
| C | -3.00963400 | 0.45397600  | 2.85393100  |
| C | -3.88036100 | -0.34192700 | 0.60871600  |
| C | -5.15181400 | -0.13213800 | 0.06577100  |
| C | -5.82481600 | -1.15770600 | -0.60296400 |
| C | -5.22837200 | -2.41049900 | -0.74180800 |
| C | -3.95646300 | -2.63078400 | -0.20644800 |
| C | -3.28956500 | -1.60549900 | 0.46332700  |
| H | -2.29146800 | 3.00069000  | 0.45904600  |
| H | -0.98445200 | 4.60712700  | -0.43745600 |
| H | 2.77703100  | 1.50270600  | -1.30921600 |
| H | 2.95573700  | 3.86398900  | -1.96718100 |
| H | 1.07903900  | 5.45416000  | -1.52766200 |
| H | -0.23658600 | 0.11960200  | 0.27523500  |
| H | 4.06590000  | -3.57675300 | -1.23687100 |
| H | 1.96914800  | -3.30555500 | -2.50362800 |
| H | 2.43960300  | 0.85311800  | 1.70300100  |
| H | 4.53111300  | 0.56863900  | 2.98315100  |
| H | 6.12170000  | -1.26194800 | 2.40624800  |
| H | 5.59600400  | -2.81950900 | 0.55509800  |
| H | 0.03405800  | -2.10539000 | -3.07516200 |
| H | -0.85872800 | -1.60390800 | -1.63277300 |
| H | -0.06410100 | -0.39156100 | -2.62752800 |
| H | -3.78145600 | 1.68995400  | 1.26837700  |
| H | -3.98741600 | 0.25929800  | 3.30744300  |
| H | -2.38091600 | -0.43103100 | 2.99467900  |
| H | -2.53904000 | 1.29345600  | 3.37723300  |
| H | -5.62118300 | 0.84435400  | 0.16517900  |
| H | -6.81264000 | -0.97391900 | -1.01766500 |
| H | -5.74803100 | -3.20972800 | -1.26357300 |
| H | -3.48382500 | -3.60433800 | -0.30920600 |
| H | -2.30052700 | -1.78515000 | 0.87605600  |

### Compound 1a, conformation c3

|   |             |             |             |
|---|-------------|-------------|-------------|
| C | -0.25120000 | 3.82030200  | -1.08075600 |
| C | -0.36593300 | 2.56073600  | -0.46249500 |
| C | 0.82187700  | 1.80571100  | -0.20387900 |
| C | 2.06529300  | 2.36938200  | -0.56467200 |
| C | 2.13387700  | 3.61492300  | -1.17281500 |
| C | 0.97534200  | 4.35568100  | -1.44291200 |
| N | 0.72611500  | 0.56486000  | 0.38394400  |
| C | 1.81641800  | -0.25721500 | 0.78428500  |
| C | 2.56373600  | -0.97767100 | -0.20396300 |
| C | 3.64265400  | -1.81982800 | 0.22081600  |
| C | 3.91539200  | -1.93888700 | 1.60784600  |
| C | 3.15971000  | -1.25731900 | 2.53098100  |
| C | 2.10079800  | -0.39720100 | 2.13778500  |
| C | 2.26714900  | -0.90318200 | -1.59258100 |
| C | 3.01393400  | -1.60497100 | -2.51255600 |
| C | 4.09424600  | -2.41885200 | -2.09432800 |
| C | 4.39626200  | -2.52462500 | -0.75623700 |
| C | 1.30486000  | 0.34631300  | 3.18444900  |
| C | -1.70426700 | 2.10795600  | -0.10301400 |
| N | -1.98223600 | 1.00151100  | 0.48637000  |
| C | -3.37835200 | 0.71074600  | 0.79341800  |
| C | -3.52082200 | 0.52997900  | 2.31734400  |
| C | -3.86604500 | -0.53129600 | 0.05120400  |
| C | -5.22405800 | -0.64839300 | -0.27174400 |
| C | -5.71441500 | -1.79062300 | -0.90531300 |
| C | -4.84789800 | -2.83543000 | -1.23106900 |
| C | -3.49172100 | -2.72513500 | -0.92001900 |
| C | -3.00402900 | -1.58242900 | -0.28367900 |
| H | -2.51109100 | 2.80924300  | -0.37257500 |
| H | -1.16436500 | 4.38084100  | -1.27126300 |
| H | 2.97378300  | 1.81486600  | -0.35816400 |
| H | 3.10835500  | 4.01757600  | -1.43801500 |
| H | 1.03654600  | 5.32867200  | -1.92016200 |
| H | -0.21277300 | 0.33932600  | 0.72073900  |
| H | 4.73075600  | -2.58171400 | 1.93099800  |
| H | 3.37856400  | -1.36014300 | 3.59108600  |
| H | 1.43494100  | -0.28907200 | -1.91778200 |
| H | 2.76988100  | -1.53746100 | -3.56942300 |
| H | 4.67717600  | -2.96398200 | -2.83181900 |
| H | 5.21692600  | -3.15604000 | -0.42337100 |
| H | 1.80644100  | 0.30652200  | 4.15633900  |
| H | 1.16585800  | 1.39712900  | 2.90984800  |
| H | 0.30227700  | -0.08253800 | 3.31480000  |
| H | -4.01950200 | 1.55676800  | 0.48880300  |
| H | -4.56040900 | 0.31174100  | 2.58336100  |
| H | -2.89656900 | -0.30214700 | 2.65967900  |
| H | -3.20647700 | 1.43927900  | 2.84158000  |
| H | -5.90474400 | 0.16502400  | -0.02712200 |
| H | -6.77118600 | -1.86047500 | -1.15045000 |
| H | -5.22547700 | -3.72472400 | -1.72881600 |
| H | -2.80718500 | -3.52962300 | -1.17683300 |
| H | -1.94572200 | -1.49569500 | -0.06020000 |

**Compound 1a, conformation c4**

|   |             |             |             |
|---|-------------|-------------|-------------|
| C | -1.36560100 | -2.86881300 | -1.20608700 |
| C | -0.85936500 | -1.68163200 | -0.64493300 |
| C | 0.54419200  | -1.58498900 | -0.38220000 |
| C | 1.36770800  | -2.67597600 | -0.73688700 |
| C | 0.82817100  | -3.82723200 | -1.29406900 |
| C | -0.54825900 | -3.94236000 | -1.52795600 |
| N | 1.05086900  | -0.44042900 | 0.18691100  |
| C | 2.40791500  | -0.18921100 | 0.51500500  |
| C | 3.10122700  | 0.83819800  | -0.20790400 |
| C | 4.45340200  | 1.15065000  | 0.14687700  |
| C | 5.07424100  | 0.41629200  | 1.18979400  |
| C | 4.38315500  | -0.56264600 | 1.86139000  |
| C | 3.03132500  | -0.87391100 | 1.55471200  |
| C | 2.49592400  | 1.55961200  | -1.27257100 |
| C | 3.18449800  | 2.55062800  | -1.93742600 |
| C | 4.51507800  | 2.86886200  | -1.57581700 |
| C | 5.13388100  | 2.17901600  | -0.55825000 |
| C | 2.30035400  | -1.90518600 | 2.37806300  |
| C | -1.81063000 | -0.60515600 | -0.38530000 |
| N | -1.49087200 | 0.55349100  | 0.06893600  |
| C | -2.49716200 | 1.61043500  | 0.26764200  |
| C | -2.15097700 | 2.35333500  | 1.56955500  |
| C | -3.96022900 | 1.18396300  | 0.22242600  |
| C | -4.51468500 | 0.36582100  | 1.21909300  |
| C | -5.85877800 | -0.00274700 | 1.17639000  |
| C | -6.67687500 | 0.44132200  | 0.13438200  |
| C | -6.13819200 | 1.25076400  | -0.86548400 |
| C | -4.79002500 | 1.61318100  | -0.82032200 |
| H | -2.85314200 | -0.85686300 | -0.61915600 |
| H | -2.43579100 | -2.92754900 | -1.39458900 |
| H | 2.43869700  | -2.59475600 | -0.58465200 |
| H | 1.49321000  | -4.64632800 | -1.55690100 |
| H | -0.96502600 | -4.84670000 | -1.96011600 |
| H | 0.36814200  | 0.31985400  | 0.26373800  |
| H | 6.10304200  | 0.64598100  | 1.45671600  |
| H | 4.86629300  | -1.10553300 | 2.67036600  |
| H | 1.47998700  | 1.31273200  | -1.56251900 |
| H | 2.70503000  | 3.08910000  | -2.75067200 |
| H | 5.04682500  | 3.65336200  | -2.10757300 |
| H | 6.15870200  | 2.41126200  | -0.27744400 |
| H | 2.79969400  | -2.05691600 | 3.34023100  |
| H | 1.26706100  | -1.59626500 | 2.56535100  |
| H | 2.25064000  | -2.87715000 | 1.87058100  |
| H | -2.33840300 | 2.32046300  | -0.55746100 |
| H | -2.80894700 | 3.21772900  | 1.70679500  |
| H | -2.26056200 | 1.69691700  | 2.43932400  |
| H | -1.11301000 | 2.69940900  | 1.53691600  |
| H | -3.88847700 | 0.01060600  | 2.03363700  |
| H | -6.26917700 | -0.63602000 | 1.95874500  |
| H | -7.72515800 | 0.15649000  | 0.10306200  |
| H | -6.76463600 | 1.60090600  | -1.68180900 |
| H | -4.37672700 | 2.24452400  | -1.60422600 |

### Compound 1b, conformation c1

|   |             |             |             |
|---|-------------|-------------|-------------|
| C | 0.26890200  | 3.99761600  | -1.20843000 |
| C | 0.09687200  | 2.78857700  | -0.50932000 |
| C | 1.19572000  | 1.87593500  | -0.42444900 |
| C | 2.40010000  | 2.21650300  | -1.07854200 |
| C | 2.52653300  | 3.41774700  | -1.76242200 |
| C | 1.46386600  | 4.32840200  | -1.83010000 |
| N | 1.04914500  | 0.69858700  | 0.26909500  |
| C | 2.04547400  | -0.29382300 | 0.46597300  |
| C | 3.13298800  | -0.05770800 | 1.30177200  |
| C | 4.08186500  | -1.09736100 | 1.49485200  |
| C | 3.93528200  | -2.33243300 | 0.91162800  |
| C | 2.82341800  | -2.60771400 | 0.07472100  |
| C | 1.86705900  | -1.56889300 | -0.16611400 |
| C | -1.21126300 | 2.53137900  | 0.08259700  |
| N | -1.55176700 | 1.45719500  | 0.69895300  |
| C | -2.89871500 | 1.36950200  | 1.25614900  |
| C | -2.80015400 | 1.37950600  | 2.78994900  |
| C | -3.65425000 | 0.12996900  | 0.70757200  |
| C | -3.88673100 | 0.23910700  | -0.81173400 |
| C | -4.70019400 | -0.94317100 | -1.36026500 |
| C | -4.04648200 | -2.28651000 | -1.00538700 |
| C | -3.81327500 | -2.40561600 | 0.50740500  |
| C | -2.99793300 | -1.22136100 | 1.05291100  |
| H | -1.93655400 | 3.35343000  | -0.03751300 |
| C | 2.63509600  | -3.87653700 | -0.53568400 |
| C | 1.55701400  | -4.11419500 | -1.35763400 |
| C | 0.62246600  | -3.08249400 | -1.61257300 |
| C | 0.77453400  | -1.84125100 | -1.03385400 |
| C | 3.30962700  | 1.25457100  | 2.02490500  |
| H | -0.57535500 | 4.68253700  | -1.25902700 |
| H | 3.22572200  | 1.51316700  | -1.05429500 |
| H | 3.46778000  | 3.64558400  | -2.25672400 |
| H | 1.57010200  | 5.26787000  | -2.36331700 |
| H | 0.09426700  | 0.51984900  | 0.59304900  |
| H | 4.93172800  | -0.90561400 | 2.14559500  |
| H | 4.66709100  | -3.11639700 | 1.09140800  |
| H | -3.48518000 | 2.25678500  | 0.95215300  |
| H | -3.79086300 | 1.25350500  | 3.24233100  |
| H | -2.14859300 | 0.57827500  | 3.15160200  |
| H | -2.38240600 | 2.33051200  | 3.13738900  |
| H | -4.64354300 | 0.15110700  | 1.19403200  |
| H | -2.91318200 | 0.27710500  | -1.32024700 |
| H | -4.39510100 | 1.18571700  | -1.04326100 |
| H | -4.81435200 | -0.84854700 | -2.44791400 |
| H | -5.71540000 | -0.91328300 | -0.93680400 |
| H | -3.08049600 | -2.36781600 | -1.52611000 |
| H | -4.66575300 | -3.11911600 | -1.36347900 |
| H | -3.30215000 | -3.34833700 | 0.74080500  |
| H | -4.78640900 | -2.44329900 | 1.02000400  |
| H | -2.88351500 | -1.32616400 | 2.13858100  |
| H | -1.98633500 | -1.25219200 | 0.62705600  |
| H | 3.36395700  | -4.66003600 | -0.34105000 |
| H | 1.42482900  | -5.08930500 | -1.81863300 |
| H | -0.21729400 | -3.26956000 | -2.27676500 |



|   |            |             |             |
|---|------------|-------------|-------------|
| H | 0.06469300 | -1.04871200 | -1.24581500 |
| H | 3.98048000 | 1.13725500  | 2.88176400  |
| H | 3.73407500 | 2.02835600  | 1.37218900  |
| H | 2.34920700 | 1.63838000  | 2.38310900  |

### Compound 1b, conformation c2

|   |             |             |             |
|---|-------------|-------------|-------------|
| C | 0.34607000  | 3.91271800  | -1.18694200 |
| C | 0.20958300  | 2.69117500  | -0.50203800 |
| C | 1.33968400  | 1.81768700  | -0.41188900 |
| C | 2.53741500  | 2.20716100  | -1.05071000 |
| C | 2.62835600  | 3.41873700  | -1.72197500 |
| C | 1.53518900  | 4.29222600  | -1.79181600 |
| N | 1.22888500  | 0.62977700  | 0.27137400  |
| C | 2.25936200  | -0.32332900 | 0.48046200  |
| C | 3.33979100  | -0.03849500 | 1.31077700  |
| C | 4.32835000  | -1.03936700 | 1.50978500  |
| C | 4.22696900  | -2.28492700 | 0.93983300  |
| C | 3.12096700  | -2.61197000 | 0.11375600  |
| C | 2.12389400  | -1.61345000 | -0.13282600 |
| C | -1.09659900 | 2.37908700  | 0.06771900  |
| N | -1.40491400 | 1.28010000  | 0.65588000  |
| C | -2.75296300 | 1.12168800  | 1.19660300  |
| C | -2.63960700 | 1.07666100  | 2.72926800  |
| C | -3.40638300 | -0.14852000 | 0.59310400  |
| C | -4.81069400 | -0.42310700 | 1.16941200  |
| C | -5.46599000 | -1.66435500 | 0.54083900  |
| C | -5.52157200 | -1.57068300 | -0.98964900 |
| C | -4.12593900 | -1.30971600 | -1.57162600 |
| C | -3.47626500 | -0.06675400 | -0.94530400 |
| H | -1.84917500 | 3.17664800  | -0.04731600 |
| C | 2.97737800  | -3.89462700 | -0.47938800 |
| C | 1.90235600  | -4.18443700 | -1.28847500 |
| C | 0.92511300  | -3.19384200 | -1.54580600 |
| C | 1.03400800  | -1.94028200 | -0.98460300 |
| C | 3.46871400  | 1.28392000  | 2.02546500  |
| H | -0.52176200 | 4.56725400  | -1.24095100 |
| H | 3.38676100  | 1.53279400  | -1.02589600 |
| H | 3.56571800  | 3.68389100  | -2.20491500 |
| H | 1.61368100  | 5.24031300  | -2.31448800 |
| H | 0.27478500  | 0.40625200  | 0.56868300  |
| H | 5.17279600  | -0.80850700 | 2.15490700  |
| H | 4.98942900  | -3.03821700 | 1.12328500  |
| H | -3.37720200 | 1.99192700  | 0.91827400  |
| H | -3.62446500 | 1.05423800  | 3.20508200  |
| H | -2.07695300 | 0.19219500  | 3.04959000  |
| H | -2.10901300 | 1.96287100  | 3.09275600  |
| H | -2.75588500 | -0.99730500 | 0.85805200  |
| H | -5.45079900 | 0.45469800  | 0.98803200  |
| H | -4.76290800 | -0.55465900 | 2.25628200  |
| H | -6.47402100 | -1.80059500 | 0.95334800  |
| H | -4.88995200 | -2.55708200 | 0.82632400  |
| H | -6.19440400 | -0.74953400 | -1.27910000 |
| H | -5.94897000 | -2.48887400 | -1.41278500 |
| H | -4.18098900 | -1.19350900 | -2.66173300 |

|   |             |             |             |
|---|-------------|-------------|-------------|
| H | -3.48655300 | -2.18520200 | -1.38364500 |
| H | -2.47105400 | 0.07849800  | -1.35568300 |
| H | -4.05940400 | 0.82485400  | -1.22668100 |
| H | 3.73777800  | -4.64665800 | -0.28130000 |
| H | 1.80433700  | -5.16972400 | -1.73625300 |
| H | 0.08541000  | -3.42300700 | -2.19662200 |
| H | 0.28831600  | -1.18108500 | -1.19605300 |
| H | 2.49329100  | 1.64076500  | 2.37071100  |
| H | 4.13303500  | 1.19212000  | 2.89056100  |
| H | 3.87725700  | 2.06632000  | 1.37288600  |

**Compound 1b, conformation c3**

|   |             |             |             |
|---|-------------|-------------|-------------|
| C | 0.07651500  | 3.83049600  | -0.51976000 |
| C | -0.05260500 | 2.47350000  | -0.16930000 |
| C | 1.02107500  | 1.57600000  | -0.46895500 |
| C | 2.15871200  | 2.09039100  | -1.12908000 |
| C | 2.24395300  | 3.43528500  | -1.46066100 |
| C | 1.20517800  | 4.32505400  | -1.15589100 |
| N | 0.92140000  | 0.25090800  | -0.11260900 |
| C | 1.87255300  | -0.76673500 | -0.40132300 |
| C | 1.57194000  | -1.72403200 | -1.36354600 |
| C | 2.50725400  | -2.76222300 | -1.61508100 |
| C | 3.70304100  | -2.83402800 | -0.94229300 |
| C | 4.03206400  | -1.87593600 | 0.05072100  |
| C | 3.09642300  | -0.83031000 | 0.34221400  |
| C | -1.29475000 | 2.05873000  | 0.47362200  |
| N | -1.59428900 | 0.85489900  | 0.80490700  |
| C | -2.87310500 | 0.60290700  | 1.46496800  |
| C | -2.57682900 | 0.17498400  | 2.91168900  |
| C | -3.66937800 | -0.45906500 | 0.66345800  |
| C | -5.01415200 | -0.81739200 | 1.32898700  |
| C | -5.81433500 | -1.84464000 | 0.51075700  |
| C | -6.03633200 | -1.37911200 | -0.93432400 |
| C | -4.70158500 | -1.03323600 | -1.60767900 |
| C | -3.90616900 | -0.00397100 | -0.79083500 |
| H | -2.00620500 | 2.87919800  | 0.66495600  |
| C | 5.25281000  | -1.93440400 | 0.77573800  |
| C | 5.53747300  | -1.01314800 | 1.75712600  |
| C | 4.60348700  | 0.00655800  | 2.06104300  |
| C | 3.41398000  | 0.09610400  | 1.37292300  |
| C | 0.27529700  | -1.67446100 | -2.13668000 |
| H | -0.74799700 | 4.49975700  | -0.28146300 |
| H | 2.97136800  | 1.41699800  | -1.37749300 |
| H | 3.13515900  | 3.79623000  | -1.96823500 |
| H | 1.27959300  | 5.37638800  | -1.41562200 |
| H | 0.00098800  | -0.01545300 | 0.24711400  |
| H | 2.26702100  | -3.50537100 | -2.37165100 |
| H | 4.41057000  | -3.63034500 | -1.16093300 |
| H | -3.47487500 | 1.53118300  | 1.49182000  |
| H | -3.49603500 | 0.05649500  | 3.49303400  |
| H | -2.02761900 | -0.77344000 | 2.92947600  |
| H | -1.95845300 | 0.93041700  | 3.40752800  |
| H | -3.04861600 | -1.36930300 | 0.63688200  |
| H | -5.61315700 | 0.09988200  | 1.44247400  |
| H | -4.85247300 | -1.21068900 | 2.33897800  |

|   |             |             |             |
|---|-------------|-------------|-------------|
| H | -6.77593800 | -2.04206400 | 1.00185700  |
| H | -5.26829500 | -2.79973600 | 0.50169000  |
| H | -6.68332100 | -0.48909300 | -0.93366000 |
| H | -6.56705900 | -2.15090100 | -1.50656400 |
| H | -4.87178300 | -0.65340700 | -2.62333300 |
| H | -4.10307300 | -1.95034300 | -1.71526200 |
| H | -2.94580100 | 0.19971300  | -1.27638700 |
| H | -4.45799700 | 0.94966400  | -0.77809100 |
| H | 5.95816300  | -2.72871300 | 0.54217000  |
| H | 6.47371700  | -1.06947700 | 2.30591200  |
| H | 4.82675900  | 0.72226300  | 2.84784600  |
| H | 2.69798300  | 0.87304800  | 1.61588600  |
| H | 0.30924100  | -2.34834200 | -2.99842700 |
| H | -0.57941000 | -1.97654200 | -1.51679300 |
| H | 0.06269100  | -0.66255800 | -2.49682700 |

### Compound 1b, conformation c4

|   |             |             |             |
|---|-------------|-------------|-------------|
| C | 0.24520623  | 3.96017365  | -1.27725120 |
| C | 0.08638771  | 2.77187026  | -0.54047706 |
| C | 1.18251116  | 1.85551380  | -0.46054167 |
| C | 2.37010633  | 2.17090482  | -1.15660317 |
| C | 2.48372626  | 3.35210184  | -1.87669234 |
| C | 1.42423369  | 4.26673439  | -1.94038520 |
| N | 1.04914500  | 0.69858700  | 0.26909500  |
| C | 2.04547400  | -0.29382300 | 0.46597300  |
| C | 1.96075337  | -1.52719368 | -0.17325789 |
| C | 3.00339263  | -2.47123151 | 0.02729578  |
| C | 4.10260864  | -2.18651044 | 0.80040491  |
| C | 4.22589100  | -0.92813510 | 1.44362141  |
| C | 3.17484027  | 0.03246589  | 1.28770092  |
| C | -1.20621325 | 2.53870952  | 0.09399324  |
| N | -1.53503728 | 1.48391205  | 0.74896347  |
| C | -2.86653307 | 1.41945951  | 1.34511041  |
| C | -2.72565738 | 1.47112282  | 2.87476453  |
| C | -3.64319349 | 0.16972038  | 0.85199518  |
| C | -3.91693192 | 0.23833261  | -0.66280146 |
| C | -4.75120562 | -0.95383485 | -1.15586709 |
| C | -4.09478272 | -2.29068403 | -0.78199457 |
| C | -3.82054884 | -2.36944394 | 0.72654911  |
| C | -2.98447027 | -1.17539453 | 1.21648576  |
| H | -1.93035841 | 3.36136021  | -0.02889254 |
| C | 5.35352548  | -0.59645086 | 2.24136654  |
| C | 5.44232350  | 0.62503361  | 2.86940677  |
| C | 4.39516024  | 1.56712127  | 2.73265608  |
| C | 3.28892767  | 1.27774535  | 1.96373761  |
| C | 0.81273993  | -1.87014763 | -1.09012570 |
| H | -0.59663711 | 4.64835731  | -1.32361667 |
| H | 3.19250178  | 1.46369659  | -1.13554664 |
| H | 3.41212672  | 3.56074270  | -2.40274526 |
| H | 1.52049095  | 5.19052606  | -2.50212364 |
| H | 0.10266992  | 0.53441412  | 0.62394376  |
| H | 2.92962507  | -3.43477972 | -0.47133602 |
| H | 4.89526183  | -2.92094932 | 0.92191732  |

|   |             |             |             |
|---|-------------|-------------|-------------|
| H | -3.45664731 | 2.30144216  | 1.03286423  |
| H | -3.70413957 | 1.36341188  | 3.35746632  |
| H | -2.06844570 | 0.67636593  | 3.24045569  |
| H | -2.29366328 | 2.42888176  | 3.18414985  |
| H | -4.61857338 | 0.21002032  | 1.36463617  |
| H | -2.95759786 | 0.25662982  | -1.19868423 |
| H | -4.42668197 | 1.18115864  | -0.90641850 |
| H | -4.89483604 | -0.88853427 | -2.24217839 |
| H | -5.75418143 | -0.90637204 | -0.70570874 |
| H | -3.14395110 | -2.39193565 | -1.32656725 |
| H | -4.72791328 | -3.12920705 | -1.09977444 |
| H | -3.30797347 | -3.30834701 | 0.97185448  |
| H | -4.77935377 | -2.38731617 | 1.26649467  |
| H | -2.84068621 | -1.25092609 | 2.30109428  |
| H | -1.98517186 | -1.22384484 | 0.76406030  |
| H | 6.14867384  | -1.33087151 | 2.34793499  |
| H | 6.31032120  | 0.86607082  | 3.47711849  |
| H | 4.46155165  | 2.52324274  | 3.24526264  |
| H | 2.48123331  | 1.99663866  | 1.87574891  |
| H | 1.08509776  | -2.69068181 | -1.76136261 |
| H | -0.08020906 | -2.17858326 | -0.53115605 |
| H | 0.52121748  | -1.00589813 | -1.69519883 |

### Compound 1b, conformation c5

|   |             |             |             |
|---|-------------|-------------|-------------|
| C | -0.38120500 | 3.62687700  | -0.18044400 |
| C | -0.33131700 | 2.23271900  | 0.00622300  |
| C | 0.86770200  | 1.53072300  | -0.33701300 |
| C | 1.94501400  | 2.26948200  | -0.87398500 |
| C | 1.85271800  | 3.64348800  | -1.04559600 |
| C | 0.68911900  | 4.34190100  | -0.69636500 |
| N | 0.94203900  | 0.17135900  | -0.13939000 |
| C | 2.03770200  | -0.66650000 | -0.48713600 |
| C | 1.91063500  | -1.53822000 | -1.56262300 |
| C | 2.99170200  | -2.40329700 | -1.87686600 |
| C | 4.16031300  | -2.38873300 | -1.15445000 |
| C | 4.31413800  | -1.51600200 | -0.04678300 |
| C | 3.23016400  | -0.64840400 | 0.30817300  |
| C | -1.52503100 | 1.58007900  | 0.53276100  |
| N | -1.66547400 | 0.31563400  | 0.70724500  |
| C | -2.91891200 | -0.18305000 | 1.27073100  |
| C | -2.61922200 | -0.71278200 | 2.68294500  |
| C | -3.49503900 | -1.27804800 | 0.32925500  |
| C | -4.79828900 | -1.92750400 | 0.84977300  |
| C | -6.01840600 | -0.99487900 | 0.75829900  |
| C | -6.22115200 | -0.48001300 | -0.67516300 |
| C | -4.94469900 | 0.17820200  | -1.22148800 |
| C | -3.73187800 | -0.76105500 | -1.10853800 |
| H | -2.34956400 | 2.26891100  | 0.78167500  |
| C | 5.50362500  | -1.49121000 | 0.73030900  |
| C | 5.61926000  | -0.65977100 | 1.82033700  |
| C | 4.54001800  | 0.18089000  | 2.18506800  |
| C | 3.37573200  | 0.18668200  | 1.44964400  |
| C | 0.64920300  | -1.57608400 | -2.39259800 |
| H | -1.29942800 | 4.14532500  | 0.08901100  |

|   |             |             |             |
|---|-------------|-------------|-------------|
| H | 2.85246500  | 1.74666500  | -1.15461700 |
| H | 2.70219100  | 4.17963400  | -1.46164700 |
| H | 0.62471900  | 5.41713600  | -0.83059500 |
| H | 0.05540900  | -0.25835100 | 0.13768500  |
| H | 2.88653400  | -3.07985000 | -2.72160700 |
| H | 4.98074200  | -3.05061300 | -1.42152500 |
| H | -3.64239300 | 0.64518200  | 1.36201400  |
| H | -3.53291300 | -1.01972500 | 3.20094300  |
| H | -1.93932500 | -1.57138800 | 2.63776100  |
| H | -2.13757400 | 0.06649300  | 3.28269500  |
| H | -2.72237100 | -2.05929500 | 0.28119700  |
| H | -4.67465000 | -2.29482400 | 1.87472000  |
| H | -4.99538900 | -2.81677300 | 0.23346900  |
| H | -5.89090000 | -0.14062000 | 1.43853800  |
| H | -6.91596100 | -1.52630800 | 1.10020200  |
| H | -7.06221500 | 0.22432100  | -0.71330400 |
| H | -6.49315900 | -1.32669300 | -1.32329800 |
| H | -4.75090600 | 1.10889900  | -0.66922900 |
| H | -5.08852300 | 0.47095800  | -2.26951900 |
| H | -3.90238800 | -1.63107800 | -1.75937200 |
| H | -2.82922500 | -0.26582400 | -1.48225900 |
| H | 6.32216400  | -2.14956500 | 0.44824900  |
| H | 6.53341300  | -0.65118500 | 2.40783000  |
| H | 4.63095800  | 0.82412800  | 3.05634300  |
| H | 2.54880700  | 0.82532700  | 1.73883500  |
| H | -0.17927800 | -2.05306000 | -1.85231200 |
| H | 0.31430700  | -0.56782100 | -2.65762300 |
| H | 0.80712700  | -2.14189100 | -3.31605300 |

### Compound 1b, conformation c6

|   |             |             |             |
|---|-------------|-------------|-------------|
| C | 0.46677200  | 3.50706800  | -1.28766800 |
| C | 0.26587800  | 2.34089000  | -0.52584800 |
| C | -1.04250800 | 1.76155700  | -0.47935000 |
| C | -2.06946000 | 2.36900900  | -1.23544900 |
| C | -1.82680100 | 3.51514800  | -1.97953000 |
| C | -0.55595600 | 4.10488500  | -2.00877800 |
| N | -1.25904700 | 0.63479900  | 0.27657700  |
| C | -2.49799300 | -0.03032500 | 0.46478300  |
| C | -3.52850900 | 0.56611500  | 1.18640300  |
| C | -4.73860300 | -0.15542000 | 1.36925900  |
| C | -4.90381600 | -1.43180800 | 0.88962300  |
| C | -3.85882300 | -2.07520900 | 0.17790500  |
| C | -2.63748500 | -1.36230000 | -0.05061200 |
| C | 1.42021400  | 1.77804600  | 0.16623000  |
| N | 1.40834900  | 0.68028200  | 0.83544200  |
| C | 2.64938500  | 0.22440300  | 1.49411700  |
| C | 3.10809500  | 1.24392300  | 2.55176000  |
| C | 3.74926900  | -0.16008500 | 0.46761400  |
| C | 5.04062700  | -0.65914800 | 1.14867300  |
| C | 6.11407700  | -1.07656200 | 0.12959500  |
| C | 5.58883200  | -2.12344000 | -0.86181700 |
| C | 4.31016100  | -1.62973500 | -1.55189200 |
| C | 3.23890600  | -1.22184700 | -0.52956400 |
| H | 2.33766100  | 2.37745900  | 0.06239000  |
| C | -3.99047900 | -3.39948700 | -0.31866100 |

|   |             |             |             |
|---|-------------|-------------|-------------|
| C | -2.96740200 | -3.99869400 | -1.01758000 |
| C | -1.76598000 | -3.29021200 | -1.25650800 |
| C | -1.60575000 | -2.00473000 | -0.78741100 |
| C | -3.38141100 | 1.93500700  | 1.80353900  |
| H | 1.46604700  | 3.93804800  | -1.30710300 |
| H | -3.05372800 | 1.91294700  | -1.24195900 |
| H | -2.64069700 | 3.95316000  | -2.55218800 |
| H | -0.37363200 | 5.00394300  | -2.58903300 |
| H | -0.40178800 | 0.22394800  | 0.66232100  |
| H | -5.54162900 | 0.31863700  | 1.92875100  |
| H | -5.83485500 | -1.96754700 | 1.05872100  |
| H | 2.37249700  | -0.69639200 | 2.02519600  |
| H | 3.87673200  | 0.82172200  | 3.20587200  |
| H | 3.51798800  | 2.15108400  | 2.09166900  |
| H | 2.25810200  | 1.53703200  | 3.17664900  |
| H | 4.00491700  | 0.74781600  | -0.10341100 |
| H | 4.79513500  | -1.52010800 | 1.79012200  |
| H | 5.45200200  | 0.11387000  | 1.80773500  |
| H | 6.99788300  | -1.45771400 | 0.65727200  |
| H | 6.44469300  | -0.18713000 | -0.42738000 |
| H | 5.37169500  | -3.05738900 | -0.32221100 |
| H | 6.35911500  | -2.36401900 | -1.60578600 |
| H | 3.91267000  | -2.40427100 | -2.22035000 |
| H | 4.55272000  | -0.76540200 | -2.18814500 |
| H | 2.34658100  | -0.85165700 | -1.04554900 |
| H | 2.92346000  | -2.11167800 | 0.03713100  |
| H | -4.92039700 | -3.93301400 | -0.13530800 |
| H | -3.08087400 | -5.01247500 | -1.39216500 |
| H | -0.96573900 | -3.76311500 | -1.81964900 |
| H | -0.68627800 | -1.46305200 | -0.98291600 |
| H | -2.37217900 | 2.08042100  | 2.20141500  |
| H | -3.55033400 | 2.73662400  | 1.07295500  |
| H | -4.10031900 | 2.07039900  | 2.61781800  |

### Compound 1c, conformation GS1-c1

|   |             |             |             |
|---|-------------|-------------|-------------|
| C | 2.19517300  | 0.44301000  | -1.14921700 |
| H | 2.77129100  | 1.32751200  | -1.46754900 |
| C | 2.04346100  | -0.50266300 | -2.35897300 |
| H | 1.42846600  | -1.36452000 | -2.08104400 |
| H | 1.55529300  | 0.01834000  | -3.19008100 |
| H | 3.01683600  | -0.87016500 | -2.69758200 |
| N | 0.85996100  | 0.86204300  | -0.73218000 |
| C | 0.58251300  | 2.11591500  | -0.74942100 |
| H | 1.34685100  | 2.84849600  | -1.05668100 |
| C | -0.70755800 | 2.69859100  | -0.40205800 |
| C | -0.84281300 | 4.09449800  | -0.52200800 |
| C | -1.83539200 | 1.92736300  | 0.02326900  |
| C | -2.03634700 | 4.74662900  | -0.25195900 |
| H | 0.02574500  | 4.66590800  | -0.84348400 |
| C | -3.05086200 | 2.60190100  | 0.27071600  |
| C | -3.14272400 | 3.98046300  | 0.13814200  |
| H | -2.11382000 | 5.82477200  | -0.35045100 |
| H | -3.92417700 | 2.02204900  | 0.54924000  |
| H | -4.09551900 | 4.46576300  | 0.33498500  |
| N | -1.71427800 | 0.56413200  | 0.16278500  |
| H | -0.83520800 | 0.18672200  | -0.20024200 |
| C | -2.73865800 | -0.33599200 | 0.55831100  |
| C | -3.21129200 | -0.34620300 | 1.86744000  |
| C | -3.22607100 | -1.27796600 | -0.40803700 |
| C | -4.21586300 | -1.28668900 | 2.22104600  |
| C | -4.21583400 | -2.23451700 | -0.01106500 |
| C | -2.76589900 | -1.29779500 | -1.75279300 |
| C | -4.70141800 | -2.20406800 | 1.32160200  |
| C | -4.68619400 | -3.17900800 | -0.96190300 |
| H | -2.03387600 | -0.56213900 | -2.06920000 |
| C | -3.24411300 | -2.22675800 | -2.65094800 |
| H | -5.45788900 | -2.92436000 | 1.62379000  |
| C | -4.21027800 | -3.18099000 | -2.25330000 |
| H | -5.43390200 | -3.90379600 | -0.64798400 |
| H | -2.88105000 | -2.22390900 | -3.67526700 |
| H | -4.57821200 | -3.90913500 | -2.97109600 |
| H | -4.58526300 | -1.28614600 | 3.24380000  |
| C | -2.66521700 | 0.58721400  | 2.91953100  |
| H | -1.58632100 | 0.72724400  | 2.79994000  |
| H | -3.12008400 | 1.58452300  | 2.86103100  |
| H | -2.85737200 | 0.19333700  | 3.92253400  |
| C | 2.95084500  | -0.23947000 | -0.00706800 |
| C | 4.38270000  | -0.35218000 | -0.04934000 |
| C | 2.26563400  | -0.77960600 | 1.06309300  |
| C | 5.18256000  | 0.18152500  | -1.10039700 |
| C | 5.05830500  | -1.03079400 | 1.02225400  |
| C | 2.93555600  | -1.44849300 | 2.11387000  |
| H | 1.18688000  | -0.67732000 | 1.10211400  |
| C | 6.55454900  | 0.05396200  | -1.09751800 |
| H | 4.70948100  | 0.70257500  | -1.92569600 |
| C | 6.47421400  | -1.14544000 | 0.99324000  |
| C | 4.30283500  | -1.57416200 | 2.09486700  |
| H | 2.35724500  | -1.86017000 | 2.93677200  |
| C | 7.21151500  | -0.61819700 | -0.04144500 |

|   |            |             |             |
|---|------------|-------------|-------------|
| H | 7.13664000 | 0.47404900  | -1.91353700 |
| H | 6.96740500 | -1.66281400 | 1.81310200  |
| H | 4.82694700 | -2.08653800 | 2.89821300  |
| H | 8.29387000 | -0.71397100 | -0.04943800 |

### Compound 1c, conformation GS1-c2

|   |             |             |             |
|---|-------------|-------------|-------------|
| C | -2.52432800 | 1.49403900  | 1.35016900  |
| H | -2.96946000 | 2.50275700  | 1.38547800  |
| C | -2.54614000 | 0.95479400  | 2.79510100  |
| H | -2.11990100 | -0.04858100 | 2.86698700  |
| H | -1.97159100 | 1.61999200  | 3.44908000  |
| H | -3.57798300 | 0.91315900  | 3.16002500  |
| N | -1.14321600 | 1.59628400  | 0.87244200  |
| C | -0.66185200 | 2.77204800  | 0.68266200  |
| H | -1.28406300 | 3.66202900  | 0.87498800  |
| C | 0.69277800  | 3.07045100  | 0.23332900  |
| C | 1.08398800  | 4.42206100  | 0.20379800  |
| C | 1.63666700  | 2.06801400  | -0.15646500 |
| C | 2.36131000  | 4.81351300  | -0.16833500 |
| H | 0.35118600  | 5.17228300  | 0.49454200  |
| C | 2.94036800  | 2.47912800  | -0.51081700 |
| C | 3.28886700  | 3.82257800  | -0.51630800 |
| H | 2.63814100  | 5.86296000  | -0.18088700 |
| H | 3.67671100  | 1.72359000  | -0.76315300 |
| H | 4.30288300  | 4.10220100  | -0.79146400 |
| N | 1.25945500  | 0.74692400  | -0.16239200 |
| H | 0.33291900  | 0.57538900  | 0.23431900  |
| C | 2.05248600  | -0.36154700 | -0.55694900 |
| C | 2.42970400  | -0.53851200 | -1.88501900 |
| C | 2.39390700  | -1.33482600 | 0.44057800  |
| C | 3.19811000  | -1.68372500 | -2.22702200 |
| C | 3.13857000  | -2.49673600 | 0.05652600  |
| C | 2.02118500  | -1.18944400 | 1.80501500  |
| C | 3.53946500  | -2.63528000 | -1.29730400 |
| C | 3.45745000  | -3.47063300 | 1.04018000  |
| H | 1.48318500  | -0.29764700 | 2.10940900  |
| C | 2.34647900  | -2.15348600 | 2.73460600  |
| H | 4.11218700  | -3.51173300 | -1.59095100 |
| C | 3.06728900  | -3.30897500 | 2.35027700  |
| H | 4.01909400  | -4.35111500 | 0.73634100  |
| H | 2.05446300  | -2.02248800 | 3.77318600  |
| H | 3.31726200  | -4.06201400 | 3.09274500  |
| H | 3.49549600  | -1.81294900 | -3.26496100 |
| C | 2.01339900  | 0.42572300  | -2.96795100 |
| H | 0.99021300  | 0.77902600  | -2.80634600 |
| H | 2.65456000  | 1.31616300  | -2.99632100 |
| H | 2.06524600  | -0.05299600 | -3.95084500 |
| C | -3.39434100 | 0.67612400  | 0.39395600  |
| C | -3.10067400 | -0.67736000 | 0.00829100  |
| C | -4.53932400 | 1.27636500  | -0.09507200 |
| C | -1.94421200 | -1.39011300 | 0.43722800  |
| C | -4.01697700 | -1.36158800 | -0.86329900 |
| C | -5.43889000 | 0.60031900  | -0.95104300 |
| H | -4.76020600 | 2.30284700  | 0.18883400  |



|   |             |             |             |
|---|-------------|-------------|-------------|
| C | -1.70773400 | -2.68752500 | 0.03891700  |
| H | -1.22684600 | -0.89767100 | 1.08006200  |
| C | -3.74338100 | -2.70047800 | -1.25386900 |
| C | -5.18254000 | -0.69501900 | -1.32641900 |
| H | -6.32775900 | 1.11354400  | -1.30791100 |
| C | -2.61592600 | -3.35438200 | -0.81507900 |
| H | -0.81133000 | -3.19758900 | 0.38068400  |
| H | -4.44906400 | -3.20024100 | -1.91371600 |
| H | -5.86401700 | -1.22906700 | -1.98447400 |
| H | -2.41921400 | -4.37746600 | -1.12410700 |

### Compound 1c, conformation GS2-c1

|   |             |             |             |
|---|-------------|-------------|-------------|
| C | -2.43698700 | 1.02470300  | 0.80878600  |
| H | -3.00881000 | 1.90527300  | 0.47174000  |
| C | -2.54284400 | 0.93292600  | 2.34535300  |
| H | -1.94516300 | 0.09038800  | 2.70815200  |
| H | -2.16531300 | 1.85128600  | 2.80837200  |
| H | -3.57867800 | 0.77904800  | 2.66228000  |
| N | -1.03001200 | 1.19990600  | 0.46132400  |
| C | -0.69024600 | 2.25139500  | -0.19282700 |
| H | -1.45305900 | 2.98992400  | -0.48981600 |
| C | 0.66856200  | 2.59138200  | -0.59636600 |
| C | 0.85639700  | 3.80318900  | -1.28796000 |
| C | 1.80721600  | 1.77269600  | -0.31214600 |
| C | 2.10933800  | 4.23191000  | -1.69842700 |
| H | -0.02033700 | 4.41304400  | -1.49701800 |
| C | 3.07874500  | 2.22827500  | -0.72353000 |
| C | 3.21999400  | 3.42983800  | -1.40335600 |
| H | 2.22720700  | 5.16978300  | -2.23198700 |
| H | 3.95116000  | 1.62482600  | -0.49957800 |
| H | 4.21429200  | 3.74894200  | -1.70600600 |
| N | 1.63959700  | 0.57532200  | 0.34675600  |
| H | 0.69602500  | 0.43676000  | 0.71643600  |
| C | 2.68415700  | -0.28504700 | 0.78855200  |
| C | 3.36363400  | -1.11909300 | -0.15802900 |
| C | 2.98814700  | -0.34695800 | 2.14349500  |
| C | 3.04271100  | -1.12258600 | -1.54318500 |
| C | 4.39656400  | -1.99669200 | 0.30729700  |
| C | 4.00018000  | -1.24249300 | 2.57899300  |
| C | 3.72320000  | -1.93434600 | -2.42324200 |
| H | 2.24473900  | -0.47922600 | -1.89657600 |
| C | 5.08245200  | -2.81589600 | -0.62957000 |
| C | 4.69168500  | -2.03432400 | 1.69429500  |
| C | 4.75831400  | -2.78544300 | -1.96633600 |
| H | 3.46148900  | -1.92536500 | -3.47800400 |
| H | 5.86843300  | -3.47419200 | -0.26650100 |
| H | 5.47201700  | -2.70353200 | 2.04883600  |
| H | 5.28901000  | -3.41802400 | -2.67277000 |
| H | 4.23506600  | -1.28419500 | 3.63982200  |
| C | 2.26203800  | 0.51697500  | 3.14763900  |
| H | 2.19976200  | 1.55699500  | 2.81050800  |
| H | 1.23155800  | 0.17421800  | 3.31013800  |
| H | 2.77000800  | 0.49845400  | 4.11679000  |
| C | -3.02646100 | -0.21911800 | 0.13976500  |
| C | -4.44941100 | -0.36535700 | 0.00395900  |

|   |             |             |             |
|---|-------------|-------------|-------------|
| C | -2.20047700 | -1.22732500 | -0.31644900 |
| C | -5.38498000 | 0.62255300  | 0.42587700  |
| C | -4.97087200 | -1.56318300 | -0.59483900 |
| C | -2.71945200 | -2.40473700 | -0.90373600 |
| H | -1.12627500 | -1.10579200 | -0.23237400 |
| C | -6.74228800 | 0.44190200  | 0.27179100  |
| H | -5.02970700 | 1.54208100  | 0.87827900  |
| C | -6.37610300 | -1.71787100 | -0.73700200 |
| C | -4.07569200 | -2.57228800 | -1.03859100 |
| H | -2.03348300 | -3.17385700 | -1.24860700 |
| C | -7.24772800 | -0.74151300 | -0.31367000 |
| H | -7.43003700 | 1.21586000  | 0.60222700  |
| H | -6.75169100 | -2.63163800 | -1.19203100 |
| H | -4.48411000 | -3.47409500 | -1.48864100 |
| H | -8.31995300 | -0.87440300 | -0.42948100 |

### Compound 1c, conformation GS2-c2

|   |             |             |             |
|---|-------------|-------------|-------------|
| C | -2.81569800 | 1.65416800  | 0.89705000  |
| H | -3.26191400 | 2.62004800  | 0.60595600  |
| C | -3.00869100 | 1.52062300  | 2.42038400  |
| H | -2.60383000 | 0.58127500  | 2.80499400  |
| H | -2.50529000 | 2.34748800  | 2.93328100  |
| H | -4.07557100 | 1.55624500  | 2.66540500  |
| N | -1.38609900 | 1.67185000  | 0.57421700  |
| C | -0.92469200 | 2.71452300  | -0.01835100 |
| H | -1.59952100 | 3.55046700  | -0.26706100 |
| C | 0.46289600  | 2.93047200  | -0.40907100 |
| C | 0.78367500  | 4.16392900  | -1.00745500 |
| C | 1.50398600  | 1.97092100  | -0.20260000 |
| C | 2.07606500  | 4.48265200  | -1.39513600 |
| H | -0.02001900 | 4.88168400  | -1.16013900 |
| C | 2.81816000  | 2.31295200  | -0.59107700 |
| C | 3.09123800  | 3.54151900  | -1.17520900 |
| H | 2.29671400  | 5.44075400  | -1.85509000 |
| H | 3.61710100  | 1.59832900  | -0.42723600 |
| H | 4.11416500  | 3.77106300  | -1.46343100 |
| N | 1.20557100  | 0.75418600  | 0.36124300  |
| H | 0.23856200  | 0.66766800  | 0.67995200  |
| C | 2.14597900  | -0.25904000 | 0.70358400  |
| C | 2.67510100  | -1.10974200 | -0.32042600 |
| C | 2.49801300  | -0.43874000 | 2.03600100  |
| C | 2.30303700  | -0.98239900 | -1.68654600 |
| C | 3.60559100  | -2.13699600 | 0.04366500  |
| C | 3.40562100  | -1.47829800 | 2.37095500  |
| C | 2.83951100  | -1.81447200 | -2.64360400 |
| H | 1.57966700  | -0.22316900 | -1.96185400 |
| C | 4.14326300  | -2.97447600 | -0.97060900 |
| C | 3.95079900  | -2.29584300 | 1.41039100  |
| C | 3.77340100  | -2.81706300 | -2.28642800 |
| H | 2.54050500  | -1.70481800 | -3.68262400 |
| H | 4.85231700  | -3.74801900 | -0.68447900 |
| H | 4.65366900  | -3.07770500 | 1.68843000  |
| H | 4.19027600  | -3.46455100 | -3.05315300 |

|   |             |             |             |
|---|-------------|-------------|-------------|
| H | 3.67925900  | -1.61304200 | 3.41465000  |
| C | 1.93447300  | 0.44989500  | 3.12007800  |
| H | 2.00185200  | 1.50767300  | 2.84546600  |
| H | 0.87366000  | 0.23973900  | 3.30951300  |
| H | 2.47137000  | 0.30292100  | 4.06234600  |
| C | -3.57067600 | 0.58529600  | 0.10267300  |
| C | -3.23686100 | -0.81264300 | 0.12308400  |
| C | -4.65344600 | 1.00139500  | -0.64939100 |
| C | -2.13508700 | -1.35217800 | 0.84651000  |
| C | -4.05083400 | -1.72917000 | -0.62851400 |
| C | -5.45181200 | 0.09779000  | -1.38756800 |
| H | -4.90509000 | 2.05925500  | -0.67308800 |
| C | -1.85742600 | -2.70131500 | 0.83606800  |
| H | -1.49408700 | -0.68218800 | 1.40375000  |
| C | -3.73657400 | -3.11514200 | -0.61705100 |
| C | -5.15662900 | -1.24277500 | -1.37529800 |
| H | -6.29465300 | 0.47293000  | -1.96179400 |
| C | -2.66565800 | -3.59670200 | 0.09859000  |
| H | -1.00469700 | -3.07933800 | 1.39351700  |
| H | -4.36444500 | -3.79184700 | -1.19230100 |
| H | -5.76068000 | -1.95115000 | -1.93737200 |
| H | -2.43597800 | -4.65878700 | 0.09592600  |

### Compound 1d, conformation GS1-c1

|   |             |             |             |
|---|-------------|-------------|-------------|
| C | -1.81772900 | 1.04062900  | 1.87606900  |
| H | -2.29425000 | 2.01000800  | 2.10170600  |
| C | -1.51610400 | 0.33361900  | 3.21015500  |
| H | -1.02906700 | -0.63131100 | 3.03566200  |
| H | -0.84808600 | 0.94835900  | 3.82347700  |
| H | -2.44263300 | 0.15739200  | 3.76673700  |
| N | -0.56179300 | 1.25082400  | 1.15637300  |
| C | -0.20128200 | 2.45703400  | 0.90085400  |
| H | -0.83360000 | 3.30256800  | 1.21764900  |
| C | 1.02568700  | 2.84425000  | 0.21558800  |
| C | 1.29247100  | 4.22032100  | 0.08857900  |
| C | 1.97103700  | 1.90448600  | -0.30521000 |
| C | 2.44875100  | 4.69624400  | -0.51101500 |
| H | 0.56051800  | 4.92117900  | 0.48531400  |
| C | 3.15512700  | 2.40299700  | -0.89144000 |
| C | 3.38230000  | 3.76849800  | -0.99191500 |
| H | 2.63035000  | 5.76291100  | -0.59684000 |
| H | 3.89938000  | 1.69893000  | -1.24781200 |
| H | 4.30648800  | 4.11616400  | -1.44703100 |
| N | 1.71396600  | 0.55795200  | -0.20691100 |
| H | 0.89239000  | 0.33169200  | 0.35947300  |
| C | 2.53528300  | -0.49786700 | -0.68075800 |
| C | 2.70336400  | -0.71650900 | -2.04515400 |
| C | 3.13143200  | -1.37651500 | 0.28445100  |
| C | 3.51307000  | -1.80605100 | -2.46485400 |
| C | 3.91523800  | -2.48527000 | -0.17193400 |
| C | 2.97614600  | -1.18708800 | 1.68467500  |
| C | 4.09699900  | -2.66622900 | -1.56727600 |
| C | 4.49092900  | -3.36530300 | 0.78285600  |
| H | 2.40325400  | -0.33647300 | 2.03890200  |
| C | 3.54893100  | -2.05908900 | 2.58465100  |
| H | 4.69768400  | -3.50253000 | -1.91684900 |
| C | 4.31061000  | -3.16249100 | 2.13218600  |
| H | 5.08029600  | -4.20646800 | 0.42499800  |
| H | 3.42054300  | -1.89564000 | 3.65138700  |
| H | 4.75636900  | -3.84332800 | 2.85232900  |
| H | 3.64599400  | -1.96799100 | -3.53191300 |
| C | 2.02414100  | 0.14558400  | -3.08037100 |
| H | 1.01426000  | 0.42126000  | -2.76091000 |
| H | 2.56652100  | 1.08367000  | -3.25555100 |
| H | 1.95563800  | -0.38196600 | -4.03695600 |
| C | -2.78659800 | 0.23473700  | 1.02027900  |
| C | -4.07527000 | 0.67838500  | 0.81255800  |
| C | -2.38327200 | -1.00096800 | 0.44142500  |
| C | -5.00996800 | -0.06944700 | 0.04623000  |
| C | -3.25927700 | -1.74868300 | -0.30855600 |
| H | -1.36495100 | -1.34739300 | 0.59017900  |
| C | -4.59443100 | -1.31325500 | -0.52890600 |
| H | -2.93681000 | -2.69010700 | -0.74770800 |
| C | -5.52584000 | -2.06131400 | -1.29675800 |
| C | -7.22193000 | -0.37322600 | -0.92076700 |
| C | -6.81051000 | -1.60371200 | -1.48899300 |
| H | -7.51418600 | -2.18549700 | -2.07831000 |

|   |             |             |             |
|---|-------------|-------------|-------------|
| H | -4.39859900 | 1.62519100  | 1.24197100  |
| H | -8.23791600 | -0.02147000 | -1.07916100 |
| H | -5.20619100 | -3.00543900 | -1.73207100 |
| C | -6.34147700 | 0.37527600  | -0.17166300 |
| H | -6.65557700 | 1.32061100  | 0.26519200  |

**Compound 1d, conformation GS1-c2**

|   |             |             |             |
|---|-------------|-------------|-------------|
| C | -1.82761500 | 1.75975300  | 1.73355100  |
| H | -2.16916700 | 2.80791900  | 1.81402600  |
| C | -1.54457600 | 1.24128800  | 3.15817100  |
| H | -1.17973900 | 0.20997700  | 3.11624800  |
| H | -0.78379100 | 1.86131800  | 3.64494400  |
| H | -2.45369900 | 1.26127400  | 3.76808800  |
| N | -0.59273200 | 1.69272000  | 0.96334500  |
| C | -0.10039300 | 2.78453900  | 0.49973300  |
| H | -0.61609900 | 3.74300700  | 0.67483100  |
| C | 1.13933700  | 2.89397500  | -0.25859200 |
| C | 1.55463700  | 4.18318600  | -0.64163800 |
| C | 1.95613600  | 1.77127100  | -0.60531100 |
| C | 2.73591600  | 4.40318300  | -1.33358700 |
| H | 0.91945800  | 5.02505200  | -0.37320100 |
| C | 3.16815700  | 2.01285700  | -1.28815600 |
| C | 3.54295000  | 3.30081300  | -1.64470700 |
| H | 3.03292300  | 5.40749600  | -1.61859700 |
| H | 3.81735100  | 1.17415700  | -1.51526100 |
| H | 4.48440700  | 3.44910800  | -2.16790800 |
| N | 1.55394300  | 0.50273300  | -0.25630000 |
| H | 0.74665800  | 0.48133800  | 0.37206800  |
| C | 2.25700200  | -0.70379200 | -0.51347700 |
| C | 2.36484200  | -1.20342800 | -1.80809700 |
| C | 2.79505500  | -1.42761300 | 0.60248900  |
| C | 3.05237000  | -2.43050800 | -2.00902200 |
| C | 3.45456500  | -2.67779800 | 0.36957900  |
| C | 2.70248600  | -0.94907700 | 1.93775900  |
| C | 3.57609700  | -3.14979400 | -0.96277900 |
| C | 3.97217300  | -3.40384000 | 1.47515500  |
| H | 2.22559900  | 0.00792500  | 2.12181200  |
| C | 3.21676700  | -1.67764200 | 2.98801300  |
| H | 4.08234100  | -4.09505700 | -1.14323800 |
| C | 3.85427100  | -2.91975200 | 2.75809800  |
| H | 4.46633000  | -4.35427000 | 1.28697600  |
| H | 3.13765100  | -1.29334200 | 4.00147300  |
| H | 4.25436400  | -3.48517000 | 3.59536800  |
| H | 3.13834600  | -2.81303100 | -3.02330800 |
| C | 1.74749500  | -0.49696800 | -2.98971400 |
| H | 0.78240200  | -0.05425500 | -2.72399600 |
| H | 2.37914800  | 0.32300200  | -3.35526400 |
| H | 1.59560100  | -1.19375300 | -3.82009300 |
| C | -2.94907600 | 0.95898200  | 1.07665600  |
| C | -2.71915400 | 0.01273800  | 0.10102500  |
| C | -4.28561000 | 1.18839000  | 1.50848000  |
| C | -3.78242600 | -0.73841900 | -0.46988500 |
| C | -5.33763400 | 0.48119800  | 0.97741100  |
| H | -4.47408700 | 1.94353800  | 2.26893800  |

|   |             |             |             |
|---|-------------|-------------|-------------|
| C | -3.55824300 | -1.71808200 | -1.47448000 |
| C | -5.12275300 | -0.50398100 | -0.02374900 |
| H | -6.35341700 | 0.67346900  | 1.31561100  |
| C | -4.60627800 | -2.43213200 | -2.01126600 |
| C | -6.18232600 | -1.25544800 | -0.59765700 |
| C | -5.93164400 | -2.19887400 | -1.56903400 |
| H | -6.75047200 | -2.76853400 | -2.00031700 |
| H | -1.70743800 | -0.16124900 | -0.25232500 |
| H | -2.53983900 | -1.89600300 | -1.81220600 |
| H | -4.41982200 | -3.17918600 | -2.77822700 |
| H | -7.19865900 | -1.07304600 | -0.25557200 |

### Compound 1d, conformation GS2-cl

|   |             |             |             |
|---|-------------|-------------|-------------|
| C | -2.06990800 | 1.89658000  | 1.19158400  |
| H | -2.53279200 | 2.82297800  | 0.81034900  |
| C | -1.99926800 | 1.99360000  | 2.72654300  |
| H | -1.54426400 | 1.09184200  | 3.14977100  |
| H | -1.39447800 | 2.85652700  | 3.02630700  |
| H | -3.00357600 | 2.10303400  | 3.14919600  |
| N | -0.71374400 | 1.75455600  | 0.66293100  |
| C | -0.28950400 | 2.63964100  | -0.16573300 |
| H | -0.94278400 | 3.47617200  | -0.46356200 |
| C | 1.03368500  | 2.66239400  | -0.77687700 |
| C | 1.33217200  | 3.73468200  | -1.63895700 |
| C | 2.03707200  | 1.67217300  | -0.53088000 |
| C | 2.56852300  | 3.86665600  | -2.25228500 |
| H | 0.55735000  | 4.47798200  | -1.81658200 |
| C | 3.29655000  | 1.82660200  | -1.15089700 |
| C | 3.54957600  | 2.89982500  | -1.99328900 |
| H | 2.77291100  | 4.70237800  | -2.91409800 |
| H | 4.07024300  | 1.09157800  | -0.95935600 |
| H | 4.53029200  | 2.98627900  | -2.45462100 |
| N | 1.75624800  | 0.60822300  | 0.29409600  |
| H | 0.85386600  | 0.67912900  | 0.77012700  |
| C | 2.67769000  | -0.39537400 | 0.70586500  |
| C | 3.04129400  | -1.44209700 | -0.20265500 |
| C | 3.16671100  | -0.37617200 | 2.00690700  |
| C | 2.51934500  | -1.52415100 | -1.52263200 |
| C | 3.95389000  | -2.45581500 | 0.23701400  |
| C | 4.05110600  | -1.40619200 | 2.42255600  |
| C | 2.89851500  | -2.54203600 | -2.36909500 |
| H | 1.80779100  | -0.77478100 | -1.85069600 |
| C | 4.32829700  | -3.48799800 | -0.66506700 |
| C | 4.44334100  | -2.40782700 | 1.56757300  |
| C | 3.81700700  | -3.53118300 | -1.94163600 |
| H | 2.48612200  | -2.59015900 | -3.37341800 |
| H | 5.02589200  | -4.24918500 | -0.32312500 |
| H | 5.13223000  | -3.17928500 | 1.90345500  |
| H | 4.10963700  | -4.32659600 | -2.62175700 |
| H | 4.43242700  | -1.38394300 | 3.44060000  |
| C | 2.77291200  | 0.71650100  | 2.97284100  |
| H | 2.86144400  | 1.70690400  | 2.51419600  |
| H | 1.73071400  | 0.61302000  | 3.30261600  |
| H | 3.40376100  | 0.69233100  | 3.86678000  |

|   |             |             |             |
|---|-------------|-------------|-------------|
| C | -2.93925400 | 0.72716400  | 0.74601300  |
| C | -4.19044700 | 0.94883100  | 0.21075900  |
| C | -2.48555500 | -0.61234600 | 0.90117200  |
| C | -5.03889400 | -0.12308700 | -0.17783500 |
| C | -3.27763200 | -1.67339100 | 0.53249300  |
| H | -1.49309600 | -0.79049200 | 1.30360900  |
| C | -6.33135500 | 0.09236700  | -0.72686400 |
| C | -4.57377000 | -1.46743300 | -0.01342600 |
| H | -2.91619600 | -2.69227700 | 0.65221200  |
| C | -5.41866600 | -2.54023200 | -0.40341000 |
| C | -7.12782700 | -0.96911600 | -1.09483300 |
| C | -6.66736700 | -2.29868200 | -0.93162600 |
| H | -7.30478100 | -3.12812600 | -1.22599800 |
| H | -4.55050300 | 1.96767200  | 0.07744700  |
| H | -6.68314000 | 1.11404500  | -0.85192800 |
| H | -5.06127600 | -3.55976700 | -0.27753200 |
| H | -8.11475000 | -0.79001600 | -1.51310400 |

### Compound 1d, conformation GS2-c2

|   |             |             |             |
|---|-------------|-------------|-------------|
| C | 2.10343300  | -2.49136100 | 0.78953700  |
| H | 2.44684200  | -3.40521400 | 0.27068200  |
| C | 2.11062800  | -2.77411200 | 2.30539300  |
| H | 1.75736900  | -1.89390600 | 2.85243800  |
| H | 1.45201300  | -3.61775500 | 2.53874400  |
| H | 3.12065900  | -3.01320300 | 2.65388400  |
| N | 0.74338500  | -2.16440200 | 0.38529500  |
| C | 0.16047800  | -2.91373700 | -0.47929000 |
| H | 0.68681900  | -3.78504300 | -0.90274100 |
| C | -1.19429500 | -2.72067200 | -0.98066200 |
| C | -1.68947600 | -3.66452600 | -1.90033000 |
| C | -2.03550500 | -1.63302100 | -0.58385700 |
| C | -2.96755100 | -3.57750000 | -2.43057300 |
| H | -1.03595400 | -4.48404400 | -2.19296800 |
| C | -3.33791200 | -1.56189200 | -1.12469000 |
| C | -3.78735700 | -2.51424800 | -2.02842500 |
| H | -3.32549300 | -4.31778900 | -3.13911200 |
| H | -3.98875000 | -0.74914300 | -0.82200000 |
| H | -4.79606800 | -2.42827300 | -2.42487900 |
| N | -1.56271700 | -0.69127100 | 0.30134900  |
| H | -0.66348900 | -0.93366400 | 0.72458800  |
| C | -2.31186700 | 0.39289400  | 0.84078500  |
| C | -2.53877800 | 1.56108200  | 0.04284800  |
| C | -2.75988000 | 0.32585100  | 2.15458700  |
| C | -2.05254900 | 1.68437600  | -1.28762900 |
| C | -3.27008300 | 2.65584300  | 0.60865300  |
| C | -3.46451500 | 1.43351700  | 2.69580300  |
| C | -2.29407000 | 2.82262300  | -2.02446700 |
| H | -1.48098600 | 0.86710800  | -1.71315500 |
| C | -3.50631600 | 3.81242500  | -0.18233700 |
| C | -3.72222500 | 2.55816900  | 1.94973500  |
| C | -3.03299000 | 3.89636600  | -1.47152200 |
| H | -1.91227300 | 2.89958500  | -3.03907000 |
| H | -4.06661900 | 4.63558200  | 0.25515800  |
| H | -4.27368800 | 3.39002900  | 2.38145500  |

|   |             |             |             |
|---|-------------|-------------|-------------|
| H | -3.21864000 | 4.78697500  | -2.06581000 |
| H | -3.81473200 | 1.37430900  | 3.72345900  |
| C | -2.50619400 | -0.89633200 | 3.00523500  |
| H | -2.74534400 | -1.81774300 | 2.46416800  |
| H | -1.45294300 | -0.96984200 | 3.30674700  |
| H | -3.10759700 | -0.86669200 | 3.91907400  |
| C | 3.07632000  | -1.36733800 | 0.43931700  |
| C | 2.65681200  | -0.10387200 | 0.08144000  |
| C | 4.47290600  | -1.63474700 | 0.50017700  |
| C | 3.58525500  | 0.93072500  | -0.21534800 |
| C | 5.39827400  | -0.65818500 | 0.21884700  |
| H | 4.81021500  | -2.63402400 | 0.76792700  |
| C | 3.16379700  | 2.23680200  | -0.58406300 |
| C | 4.98813100  | 0.65315100  | -0.14404300 |
| H | 6.46180400  | -0.88169900 | 0.26544700  |
| C | 5.91212200  | 1.68952000  | -0.44218400 |
| C | 4.08419900  | 3.22154700  | -0.86645700 |
| C | 5.47185900  | 2.94589200  | -0.79482600 |
| H | 6.18832800  | 3.73140400  | -1.02002500 |
| H | 6.97687100  | 1.47380300  | -0.38691300 |
| H | 3.74814900  | 4.21648000  | -1.14621100 |
| H | 1.59508300  | 0.11137500  | 0.01165300  |
| H | 2.09785200  | 2.44564900  | -0.63898800 |



### Compound 1g, conformation GS1-c1

|   |             |             |             |
|---|-------------|-------------|-------------|
| C | 0.99870100  | 2.33674000  | -0.54433500 |
| H | 1.72689200  | 3.11842100  | -0.81165100 |
| C | -0.38590200 | 2.65810900  | -0.86232500 |
| C | -0.63326200 | 3.86986600  | -1.53458800 |
| C | -1.48900000 | 1.80113600  | -0.54906300 |
| C | -1.90874500 | 4.25390100  | -1.91972600 |
| H | 0.21644900  | 4.51192500  | -1.75803200 |
| C | -2.77895900 | 2.19431900  | -0.96899400 |
| C | -2.97880400 | 3.39468100  | -1.63635000 |
| H | -2.07254900 | 5.19382200  | -2.43728300 |
| H | -3.61589100 | 1.53105300  | -0.77873700 |
| H | -3.98566500 | 3.66243900  | -1.94737900 |
| N | -1.26788400 | 0.62518300  | 0.12806900  |
| H | -0.27825500 | 0.38838600  | 0.24176900  |
| C | -2.25291000 | -0.30549800 | 0.54789600  |
| C | -3.17457000 | 0.02452000  | 1.53804200  |
| C | -2.23138600 | -1.62035200 | -0.02730700 |
| C | -4.12602200 | -0.95279700 | 1.93591600  |
| C | -3.18447600 | -2.59255300 | 0.41833400  |
| C | -1.29646100 | -1.99824200 | -1.02885300 |
| C | -4.13517800 | -2.21833700 | 1.40264400  |
| C | -3.15402400 | -3.89831200 | -0.13967800 |
| H | -0.58090600 | -1.26437500 | -1.38412800 |
| C | -1.29309300 | -3.27409100 | -1.54885800 |
| H | -4.86474400 | -2.95194800 | 1.73730000  |
| C | -2.22781500 | -4.23665800 | -1.09983000 |
| H | -3.88018500 | -4.62918300 | 0.20894900  |
| H | -0.56870300 | -3.54316900 | -2.31290200 |
| H | -2.21431200 | -5.23962500 | -1.51791800 |
| H | -4.84786300 | -0.68594900 | 2.70427500  |
| C | -3.16758900 | 1.37041200  | 2.21988900  |
| H | -2.14496000 | 1.73135000  | 2.36773700  |
| H | -3.68881800 | 2.13511300  | 1.62963200  |
| H | -3.66110000 | 1.31046800  | 3.19517900  |
| N | 1.39665900  | 1.23794700  | -0.00798800 |
| C | 2.81408200  | 1.07346200  | 0.24760900  |
| C | 3.39698400  | -0.20918500 | -0.31844100 |
| C | 3.12846000  | 0.93549000  | 1.75689900  |
| H | 3.38584400  | 1.94377400  | -0.12589100 |
| C | 3.12908700  | -0.81984600 | -1.53989600 |
| C | 4.32794400  | -0.75950600 | 0.57324300  |
| C | 4.43216400  | 0.09927400  | 1.81375800  |
| O | 3.21602900  | 2.22739200  | 2.33644200  |
| H | 2.30704000  | 0.35873200  | 2.20802000  |
| C | 3.80672500  | -1.99828700 | -1.86778200 |
| H | 2.39929700  | -0.39153800 | -2.22213900 |
| C | 5.00190600  | -1.93404800 | 0.24592200  |
| H | 4.53188100  | -0.47727300 | 2.74147900  |
| H | 5.29117600  | 0.78310300  | 1.75734600  |
| H | 3.21130900  | 2.12458200  | 3.29997700  |
| C | 4.73637500  | -2.55048600 | -0.98121000 |
| H | 3.60637100  | -2.49125300 | -2.81552800 |
| H | 5.71987500  | -2.37233200 | 0.93535000  |
| H | 5.25276100  | -3.46983800 | -1.24500900 |



### Compound 1g, conformation GS1-c2

|   |             |             |             |
|---|-------------|-------------|-------------|
| C | 1.26850700  | 2.12576300  | -0.62003600 |
| H | 1.99209100  | 2.84543500  | -1.03302800 |
| C | -0.11340300 | 2.58611800  | -0.61443400 |
| C | -0.36310300 | 3.89525700  | -1.06859700 |
| C | -1.21223300 | 1.78843800  | -0.16103900 |
| C | -1.63671700 | 4.44283500  | -1.07787500 |
| H | 0.48364700  | 4.48598900  | -1.41240800 |
| C | -2.50171300 | 2.36465000  | -0.16210500 |
| C | -2.70330100 | 3.66140000  | -0.61307900 |
| H | -1.80255700 | 5.45547500  | -1.43186100 |
| H | -3.33980000 | 1.77851700  | 0.19762500  |
| H | -3.70999400 | 4.07196700  | -0.59960200 |
| N | -0.99000500 | 0.49665600  | 0.25778300  |
| H | 0.00042900  | 0.25008800  | 0.33679900  |
| C | -1.96337200 | -0.38676000 | 0.80053700  |
| C | -1.91659000 | -0.69712300 | 2.15497600  |
| C | -2.93537600 | -0.99493500 | -0.05984700 |
| C | -2.86364600 | -1.61336700 | 2.68304600  |
| C | -3.89411100 | -1.89764700 | 0.50557100  |
| C | -2.97645400 | -0.75221700 | -1.46020500 |
| C | -3.82969300 | -2.18753000 | 1.89265000  |
| C | -4.86898800 | -2.49135000 | -0.34089900 |
| H | -2.23636600 | -0.09224100 | -1.89834500 |
| C | -3.93033400 | -1.35026900 | -2.25322800 |
| H | -4.55409900 | -2.87601600 | 2.32124300  |
| C | -4.89240600 | -2.22299200 | -1.69004200 |
| H | -5.59565500 | -3.16990800 | 0.10013000  |
| H | -3.94313100 | -1.15460000 | -3.32220100 |
| H | -5.64178400 | -2.68485700 | -2.32723100 |
| H | -2.82336700 | -1.84782800 | 3.74408600  |
| C | -0.87922300 | -0.07886200 | 3.06221800  |
| H | 0.11543600  | -0.51410100 | 2.89603000  |
| H | -0.78619500 | 0.99820400  | 2.88887500  |
| H | -1.13568700 | -0.23991500 | 4.11400300  |
| N | 1.66924200  | 0.98546200  | -0.18054000 |
| C | 3.09012000  | 0.70069700  | -0.22138400 |
| C | 3.42902000  | -0.69868800 | -0.69931400 |
| C | 3.74087000  | 0.72851100  | 1.18318900  |
| H | 3.62433100  | 1.44960500  | -0.83568900 |
| C | 2.82532600  | -1.44279700 | -1.70828200 |
| C | 4.51167500  | -1.21403100 | 0.02716800  |
| C | 4.96777700  | -0.21069300 | 1.06338100  |
| O | 4.03777000  | 2.07045300  | 1.53361400  |
| H | 3.01586700  | 0.29146400  | 1.88693600  |
| C | 3.32143900  | -2.71883700 | -1.99321000 |
| H | 1.97425300  | -1.04301800 | -2.25304900 |
| C | 5.00509800  | -2.48532900 | -0.25746900 |
| H | 5.25646900  | -0.66464000 | 2.01927800  |
| H | 5.82560400  | 0.37663500  | 0.70572000  |
| H | 4.24769000  | 2.09503700  | 2.47929600  |
| C | 4.40435600  | -3.23471900 | -1.27449900 |
| H | 2.85801400  | -3.31666800 | -2.77364400 |
| H | 5.83953600  | -2.89618600 | 0.30633800  |
| H | 4.77729000  | -4.23002900 | -1.50205700 |

### Compound 1g, conformation GS2-c1

|   |             |             |             |
|---|-------------|-------------|-------------|
| C | 1.16903500  | 2.22903200  | -0.20877300 |
| H | 1.85992000  | 3.08622600  | -0.18867700 |
| C | -0.18953800 | 2.54937100  | -0.62522800 |
| C | -0.45923000 | 3.88157400  | -0.99258100 |
| C | -1.24291900 | 1.58246200  | -0.70117400 |
| C | -1.70882800 | 4.28628200  | -1.43600400 |
| H | 0.35210700  | 4.60363000  | -0.92479100 |
| C | -2.50593600 | 2.00572700  | -1.17098500 |
| C | -2.72819700 | 3.32853200  | -1.52625400 |
| H | -1.89135300 | 5.31993600  | -1.71256100 |
| H | -3.30666200 | 1.27950200  | -1.25332500 |
| H | -3.71353200 | 3.61836500  | -1.88304300 |
| N | -1.00223900 | 0.28215200  | -0.32216300 |
| H | -0.01689400 | 0.08328800  | -0.12787500 |
| C | -1.91336000 | -0.80526700 | -0.41919100 |
| C | -1.68265600 | -1.79778700 | -1.36534800 |
| C | -3.01128000 | -0.90295100 | 0.49703500  |
| C | -2.56835300 | -2.90535000 | -1.42786700 |
| C | -3.90313100 | -2.02009500 | 0.39403600  |
| C | -3.24233600 | 0.05699900  | 1.52032100  |
| C | -3.65073900 | -3.01187100 | -0.58813900 |
| C | -5.00192600 | -2.11343400 | 1.29039400  |
| H | -2.55482500 | 0.88910200  | 1.62175700  |
| C | -4.31288900 | -0.06800500 | 2.37749100  |
| H | -4.32423900 | -3.86230400 | -0.66341400 |
| C | -5.20802500 | -1.15855700 | 2.25915000  |
| H | -5.67619500 | -2.96194100 | 1.19867800  |
| H | -4.47084000 | 0.67464700  | 3.15512300  |
| H | -6.05104600 | -1.24218100 | 2.93977500  |
| H | -2.38421000 | -3.67554800 | -2.17299300 |
| C | -0.51415500 | -1.71042000 | -2.31875400 |
| H | -0.45535700 | -0.72188000 | -2.78704200 |
| H | 0.44394800  | -1.87652100 | -1.80897600 |
| H | -0.60066100 | -2.46184100 | -3.10977400 |
| N | 1.58539800  | 1.05468200  | 0.10919500  |
| C | 2.96812900  | 0.90191900  | 0.51505500  |
| C | 3.68124200  | -0.25699200 | -0.15697800 |
| C | 3.10467400  | 0.54146600  | 2.01482500  |
| H | 3.53382800  | 1.83894100  | 0.35468400  |
| C | 3.58948400  | -0.68449600 | -1.47846900 |
| C | 4.52659300  | -0.90654900 | 0.75319400  |
| C | 4.43643900  | -0.24576700 | 2.11071500  |
| O | 3.04981500  | 1.72973100  | 2.78763400  |
| H | 2.26775100  | -0.12747800 | 2.26522700  |
| C | 4.35896500  | -1.77810800 | -1.88871800 |
| H | 2.92439500  | -0.18113000 | -2.17525900 |
| C | 5.29249600  | -1.99588200 | 0.34337200  |
| H | 4.45703400  | -0.95423800 | 2.94772700  |
| H | 5.25701200  | 0.46941900  | 2.26483800  |
| H | 2.90447000  | 1.48024800  | 3.71255400  |
| C | 5.20464900  | -2.42776500 | -0.98419200 |
| H | 4.29646700  | -2.12806900 | -2.91583700 |
| H | 5.94497200  | -2.51069400 | 1.04489200  |
| H | 5.79403400  | -3.27958400 | -1.31355800 |

### Compound 1g, conformation GS2-c2

|   |             |             |             |
|---|-------------|-------------|-------------|
| C | -1.10010500 | 2.29677800  | -0.38745500 |
| H | -1.84603500 | 3.08172300  | -0.58693400 |
| C | 0.27095400  | 2.77334700  | -0.26848300 |
| C | 0.50231800  | 4.14640600  | -0.47509800 |
| C | 1.38183100  | 1.91960600  | 0.02561000  |
| C | 1.77337800  | 4.69769700  | -0.41918100 |
| H | -0.35434300 | 4.78080800  | -0.69376900 |
| C | 2.67291300  | 2.49150400  | 0.05750900  |
| C | 2.85823300  | 3.84993900  | -0.15811400 |
| H | 1.92501300  | 5.75987200  | -0.58331900 |
| H | 3.52680400  | 1.84667200  | 0.23573900  |
| H | 3.86703200  | 4.25452000  | -0.12881100 |
| N | 1.17045300  | 0.58057600  | 0.25282800  |
| H | 0.21179600  | 0.27081100  | 0.06824300  |
| C | 2.16265700  | -0.38868200 | 0.55515800  |
| C | 2.80979500  | -0.38749000 | 1.78728500  |
| C | 2.43338800  | -1.40821700 | -0.41697700 |
| C | 3.77267000  | -1.39813600 | 2.05171200  |
| C | 3.38722900  | -2.43131100 | -0.10810600 |
| C | 1.79196500  | -1.43972900 | -1.68508400 |
| C | 4.05263500  | -2.39044800 | 1.14413000  |
| C | 3.64352100  | -3.44986900 | -1.06440900 |
| H | 1.08632200  | -0.65419800 | -1.93477900 |
| C | 2.06533100  | -2.44083100 | -2.59127900 |
| H | 4.78206000  | -3.16185400 | 1.37930600  |
| C | 2.99604100  | -3.46005800 | -2.27882800 |
| H | 4.36577800  | -4.22467700 | -0.81740700 |
| H | 1.56761200  | -2.44566100 | -3.55749400 |
| H | 3.20163100  | -4.24468800 | -3.00201700 |
| H | 4.27862000  | -1.38909500 | 3.01424200  |
| C | 2.49251700  | 0.63388200  | 2.85134600  |
| H | 3.00322100  | 1.58849100  | 2.67020200  |
| H | 1.42021600  | 0.85172400  | 2.87873100  |
| H | 2.80112800  | 0.27345200  | 3.83771000  |
| N | -1.46498300 | 1.06751700  | -0.28830500 |
| C | -2.86882600 | 0.75353100  | -0.46649800 |
| C | -3.44099000 | -0.15443200 | 0.60674800  |
| C | -3.13372100 | -0.06272200 | -1.75471100 |
| H | -3.47273700 | 1.67746400  | -0.54037300 |
| C | -3.18669100 | -0.15064000 | 1.97472700  |
| C | -4.34145300 | -1.06935100 | 0.04349300  |
| C | -4.42648800 | -0.86212500 | -1.45237200 |
| O | -3.21530800 | 0.82240800  | -2.86028400 |
| H | -2.29326800 | -0.76325600 | -1.87444000 |
| C | -3.85065900 | -1.07590900 | 2.78622800  |
| H | -2.47363500 | 0.55044300  | 2.40031800  |
| C | -5.00215400 | -1.99088800 | 0.85274100  |
| H | -4.49691300 | -1.79615200 | -2.02306200 |
| H | -5.29382200 | -0.24370000 | -1.72456200 |
| H | -3.18953600 | 0.29260500  | -3.67128300 |
| C | -4.75270100 | -1.98763700 | 2.22913300  |
| H | -3.65963700 | -1.09131700 | 3.85607500  |
| H | -5.69625600 | -2.70965400 | 0.42320500  |
| H | -5.25840700 | -2.70552100 | 2.86974400  |

### Compound 1h, conformation GS1-c1

|   |             |             |             |
|---|-------------|-------------|-------------|
| C | 0.79096900  | 2.32032100  | 0.13297400  |
| H | 1.48506800  | 3.15414400  | -0.06785400 |
| C | -0.62355300 | 2.67546300  | 0.10371500  |
| C | -0.95171200 | 4.03576300  | -0.04383900 |
| C | -1.67802500 | 1.71648200  | 0.25019600  |
| C | -2.26373600 | 4.48437100  | -0.02409200 |
| H | -0.13693900 | 4.74751600  | -0.16284900 |
| C | -3.00699900 | 2.19238600  | 0.29473900  |
| C | -3.28719500 | 3.54488900  | 0.15836300  |
| H | -2.49123500 | 5.53975600  | -0.13697700 |
| H | -3.81488400 | 1.48509100  | 0.44105800  |
| H | -4.32297400 | 3.87304100  | 0.19856400  |
| N | -1.36714700 | 0.37698400  | 0.34260400  |
| H | -0.36796000 | 0.20310800  | 0.49149300  |
| C | -2.26117400 | -0.70377500 | 0.54814500  |
| C | -2.11028400 | -1.48045600 | 1.69426400  |
| C | -3.23584200 | -1.04904400 | -0.44664800 |
| C | -2.97869800 | -2.58333200 | 1.89627000  |
| C | -4.11759200 | -2.15225200 | -0.19935500 |
| C | -3.34298200 | -0.36594600 | -1.68974100 |
| C | -3.96643200 | -2.90122400 | 0.99520300  |
| C | -5.09853300 | -2.48659900 | -1.17211600 |
| H | -2.65313600 | 0.44132100  | -1.90642000 |
| C | -4.29517100 | -0.72602200 | -2.61721900 |
| H | -4.63334600 | -3.73986600 | 1.18024300  |
| C | -5.19273700 | -1.78847900 | -2.35358300 |
| H | -5.76951700 | -3.31767700 | -0.96669000 |
| H | -4.35482800 | -0.19366000 | -3.56287200 |
| H | -5.94468000 | -2.05730400 | -3.09067700 |
| H | -2.86128400 | -3.17516200 | 2.80095400  |
| C | -1.03505000 | -1.16920400 | 2.70859500  |
| H | -0.03322200 | -1.38459900 | 2.31334500  |
| H | -1.04202900 | -0.10997100 | 2.98923300  |
| H | -1.17110900 | -1.76674100 | 3.61538200  |
| N | 1.23538000  | 1.14572900  | 0.39339900  |
| C | 2.96457300  | -0.43370900 | -0.26215100 |
| O | 2.40146600  | -1.46140200 | 0.55074400  |
| H | 2.43881000  | -0.39428200 | -1.22914800 |
| H | 2.49051700  | -2.29724100 | 0.06678100  |
| C | 4.44727200  | -0.65131800 | -0.53346300 |
| C | 5.23822900  | -1.42562800 | 0.32379500  |
| C | 5.04544600  | -0.06615200 | -1.65757600 |
| C | 6.59893300  | -1.60500400 | 0.06608500  |
| H | 4.77608500  | -1.88989000 | 1.18957700  |
| C | 6.40516400  | -0.23953900 | -1.91418300 |
| H | 4.43886300  | 0.52456300  | -2.34166000 |
| C | 7.18715800  | -1.01104900 | -1.05124400 |
| H | 7.19934700  | -2.21063900 | 0.74016300  |
| H | 6.85242400  | 0.21933000  | -2.79214700 |
| H | 8.24568100  | -1.15228500 | -1.25262800 |
| C | 2.67236300  | 0.91733300  | 0.44066000  |
| H | 3.20989800  | 1.69730400  | -0.12576400 |
| C | 3.15473100  | 0.94568900  | 1.89768800  |
| H | 2.96818100  | 1.93373700  | 2.33103000  |

|   |            |            |            |
|---|------------|------------|------------|
| H | 2.62013500 | 0.19984300 | 2.49088300 |
| H | 4.22805900 | 0.73899300 | 1.95611600 |

**Compound 1h, conformation GS1-c2**

|   |             |             |             |
|---|-------------|-------------|-------------|
| C | 0.60686300  | 2.40920400  | -0.02303300 |
| H | 1.35033900  | 3.20768000  | -0.18796000 |
| C | -0.76230100 | 2.76020800  | -0.37912800 |
| C | -0.99155800 | 4.04156800  | -0.91333100 |
| C | -1.86312900 | 1.85240000  | -0.25063400 |
| C | -2.24687000 | 4.45192300  | -1.33623900 |
| H | -0.14306600 | 4.71789900  | -0.99876100 |
| C | -3.12919500 | 2.27492300  | -0.71440700 |
| C | -3.31189700 | 3.54633000  | -1.23991500 |
| H | -2.39775200 | 5.44658000  | -1.74383200 |
| H | -3.96053000 | 1.57966300  | -0.67191800 |
| H | -4.30097600 | 3.83448900  | -1.58770700 |
| N | -1.66082800 | 0.60539500  | 0.29172200  |
| H | -0.67477400 | 0.37517900  | 0.45698400  |
| C | -2.64152700 | -0.40317800 | 0.47304500  |
| C | -3.66683000 | -0.24715300 | 1.40184400  |
| C | -2.51033700 | -1.61893200 | -0.27897100 |
| C | -4.61383100 | -1.29534900 | 1.55398700  |
| C | -3.46631300 | -2.66743200 | -0.08244900 |
| C | -1.46342500 | -1.82406900 | -1.21844300 |
| C | -4.52325300 | -2.46638800 | 0.84236800  |
| C | -3.33266600 | -3.87385100 | -0.82022700 |
| H | -0.73810400 | -1.03367900 | -1.37731600 |
| C | -1.36338000 | -3.00649400 | -1.91865200 |
| H | -5.25411900 | -3.25813200 | 0.98874200  |
| C | -2.30410700 | -4.04438600 | -1.71852500 |
| H | -4.06297700 | -4.66390500 | -0.66051200 |
| H | -0.55845100 | -3.14273700 | -2.63648900 |
| H | -2.21375400 | -4.97187800 | -2.27767900 |
| H | -5.41654100 | -1.16348400 | 2.27575400  |
| C | -3.77664900 | 0.98152900  | 2.27058300  |
| H | -2.78671800 | 1.34194300  | 2.56699500  |
| H | -4.27252400 | 1.81217200  | 1.75182100  |
| H | -4.35392100 | 0.76333500  | 3.17474700  |
| N | 0.96718800  | 1.26461000  | 0.43127500  |
| C | 2.83308000  | -0.18662300 | -0.15906800 |
| O | 2.10359300  | -1.32678500 | 0.28098100  |
| H | 2.55098100  | 0.06259200  | -1.19497700 |
| H | 2.33621000  | -2.06775100 | -0.30005100 |
| C | 4.34029400  | -0.40103400 | -0.11831800 |
| C | 4.91571700  | -1.35421500 | 0.73062700  |
| C | 5.17933400  | 0.36501700  | -0.93861700 |
| C | 6.30027800  | -1.53281600 | 0.76261000  |
| H | 4.26842400  | -1.95616600 | 1.36105200  |
| C | 6.56273000  | 0.19238400  | -0.90437400 |
| H | 4.74422000  | 1.09822500  | -1.61535200 |
| C | 7.12800600  | -0.75916200 | -0.05206400 |

|   |            |             |             |
|---|------------|-------------|-------------|
| H | 6.73179400 | -2.27826600 | 1.42574400  |
| H | 7.19875200 | 0.79336600  | -1.54915400 |
| H | 8.20537600 | -0.89947900 | -0.02818900 |
| C | 2.37250000 | 1.01600900  | 0.71064800  |
| H | 2.99098200 | 1.87864600  | 0.40473900  |
| C | 2.55850500 | 0.77257700  | 2.21314800  |
| H | 2.23747900 | 1.65596600  | 2.77453600  |
| H | 1.95732700 | -0.08111700 | 2.53585500  |
| H | 3.60881100 | 0.57516700  | 2.44931300  |

**Compound 1h, conformation GS2-c1**

|   |             |             |             |
|---|-------------|-------------|-------------|
| C | 0.85580200  | 2.09465400  | 0.35337400  |
| H | 1.59414500  | 2.90039500  | 0.50610900  |
| C | -0.47067200 | 2.54827100  | -0.04669500 |
| C | -0.66181900 | 3.93156400  | -0.22261600 |
| C | -1.56144200 | 1.65661700  | -0.30697100 |
| C | -1.86814500 | 4.46065600  | -0.65516200 |
| H | 0.17753700  | 4.59311500  | -0.01634800 |
| C | -2.77656600 | 2.20901100  | -0.77023700 |
| C | -2.92131600 | 3.57912400  | -0.93509200 |
| H | -1.99081500 | 5.53167200  | -0.78243800 |
| H | -3.60274900 | 1.54548400  | -0.99827800 |
| H | -3.87225900 | 3.96764100  | -1.29145200 |
| N | -1.39769500 | 0.30563700  | -0.10483300 |
| H | -0.42906500 | 0.03519400  | 0.09483000  |
| C | -2.32285200 | -0.71934100 | -0.44074800 |
| C | -2.00640000 | -1.59446400 | -1.47485200 |
| C | -3.51991700 | -0.89138100 | 0.32801600  |
| C | -2.90858000 | -2.64515500 | -1.78378700 |
| C | -4.42462100 | -1.94580600 | -0.02459600 |
| C | -3.83789500 | -0.07131200 | 1.44559000  |
| C | -4.08705600 | -2.81099900 | -1.09635200 |
| C | -5.62164900 | -2.10961100 | 0.72387800  |
| H | -3.14145400 | 0.70594000  | 1.73904800  |
| C | -5.00202700 | -0.26398300 | 2.15542200  |
| H | -4.77058200 | -3.61442000 | -1.36058500 |
| C | -5.90988300 | -1.28642100 | 1.78772600  |
| H | -6.30473100 | -2.90779400 | 0.44210900  |
| H | -5.22447300 | 0.37056500  | 3.00927700  |
| H | -6.82731600 | -1.42397000 | 2.35375100  |
| H | -2.65789900 | -3.32137500 | -2.59764700 |
| C | -0.72793100 | -1.43554100 | -2.26431600 |
| H | -0.63272300 | -0.41938500 | -2.66464600 |
| H | 0.16073900  | -1.61411700 | -1.64526100 |
| H | -0.70197700 | -2.13723800 | -3.10417600 |
| N | 1.19172100  | 0.86578600  | 0.50955800  |
| C | 3.18040700  | -0.32480900 | -0.26075800 |
| O | 2.48171200  | -1.56845200 | -0.27867300 |
| H | 2.99438200  | 0.21995200  | -1.20000800 |
| H | 2.86731500  | -2.10566300 | -0.98874200 |
| C | 4.68413600  | -0.50750900 | -0.10820800 |
| C | 5.22118300  | -1.64872600 | 0.50039200  |
| C | 5.55961100  | 0.48021900  | -0.57903200 |



|   |            |             |             |
|---|------------|-------------|-------------|
| C | 6.60284200 | -1.79566700 | 0.63958200  |
| H | 4.54814000 | -2.42112700 | 0.86004000  |
| C | 6.93944400 | 0.33836900  | -0.43579600 |
| H | 5.15644600 | 1.36492900  | -1.06835000 |
| C | 7.46580700 | -0.80247800 | 0.17474600  |
| H | 7.00426500 | -2.68815600 | 1.11273200  |
| H | 7.60412700 | 1.11313900  | -0.80899400 |
| H | 8.54104400 | -0.91774900 | 0.28190200  |
| C | 2.56379100 | 0.54511600  | 0.87003900  |
| H | 3.17759900 | 1.46227300  | 0.92091100  |
| C | 2.58339800 | -0.14790600 | 2.23749000  |
| H | 2.16129900 | 0.51875500  | 2.99626600  |
| H | 1.98506900 | -1.06194900 | 2.20822200  |
| H | 3.60615400 | -0.40342100 | 2.53181300  |

### Compound 1h, conformation GS2-c2

|   |             |             |             |
|---|-------------|-------------|-------------|
| C | -0.77828900 | 2.12014800  | -0.78363700 |
| H | -1.55286400 | 2.84733400  | -1.08145300 |
| C | 0.55879100  | 2.67869800  | -0.62673200 |
| C | 0.74199700  | 4.03693900  | -0.94531500 |
| C | 1.68357900  | 1.90987000  | -0.18557000 |
| C | 1.98137000  | 4.65393000  | -0.86507300 |
| H | -0.12625600 | 4.60582600  | -1.27264600 |
| C | 2.94368300  | 2.54680800  | -0.13157700 |
| C | 3.08316300  | 3.88737600  | -0.46242600 |
| H | 2.09649200  | 5.70327800  | -1.11776500 |
| H | 3.81206000  | 1.96418400  | 0.15663800  |
| H | 4.06969800  | 4.34175400  | -0.41184300 |
| N | 1.51793000  | 0.58897500  | 0.15651400  |
| H | 0.58832000  | 0.21105500  | -0.05451500 |
| C | 2.52965500  | -0.29012000 | 0.62349600  |
| C | 3.09846900  | -0.12190800 | 1.88274500  |
| C | 2.90454400  | -1.39571700 | -0.21068700 |
| C | 4.09002600  | -1.04477800 | 2.31135200  |
| C | 3.88634800  | -2.32537500 | 0.26231700  |
| C | 2.33892100  | -1.60318300 | -1.49797100 |
| C | 4.47266700  | -2.11235300 | 1.53651300  |
| C | 4.24789300  | -3.42715800 | -0.55799200 |
| H | 1.60691500  | -0.89408800 | -1.86968900 |
| C | 2.71231100  | -2.68213700 | -2.26897900 |
| H | 5.22317600  | -2.81260200 | 1.89557900  |
| C | 3.67325100  | -3.60679100 | -1.79561400 |
| H | 4.99146100  | -4.12910500 | -0.18722700 |
| H | 2.26880300  | -2.82295100 | -3.25110100 |
| H | 3.95838800  | -4.45407600 | -2.41351700 |
| H | 4.53493100  | -0.90413900 | 3.29369100  |
| C | 2.66831200  | 0.98834700  | 2.80944100  |
| H | 3.15335800  | 1.94176700  | 2.56311800  |
| H | 1.58916600  | 1.15882800  | 2.74335900  |
| H | 2.92084700  | 0.74530700  | 3.84650600  |
| N | -1.07637300 | 0.88353900  | -0.61331200 |
| C | -2.94444900 | -0.24307300 | 0.48455800  |
| O | -2.20357200 | -1.45031200 | 0.62157800  |
| H | -2.69996300 | 0.44343700  | 1.31118100  |

|   |             |             |             |
|---|-------------|-------------|-------------|
| H | -2.45558500 | -1.85296100 | 1.46728500  |
| C | -4.45004100 | -0.47552200 | 0.49108000  |
| C | -4.99513300 | -1.71498900 | 0.13496400  |
| C | -5.31798200 | 0.56266400  | 0.85529500  |
| C | -6.37796100 | -1.90968600 | 0.13696200  |
| H | -4.32553400 | -2.52489500 | -0.13793900 |
| C | -6.69944600 | 0.37232400  | 0.85300300  |
| H | -4.90718900 | 1.52661300  | 1.15018300  |
| C | -7.23425300 | -0.86703800 | 0.49318000  |
| H | -6.78570000 | -2.87848300 | -0.14028700 |
| H | -7.35808700 | 1.18768700  | 1.14084200  |
| H | -8.31027400 | -1.01925000 | 0.49640100  |
| C | -2.45320000 | 0.45521600  | -0.81268300 |
| H | -3.11221400 | 1.32757100  | -0.96884900 |
| C | -2.53086600 | -0.45614200 | -2.04383000 |
| H | -2.20821200 | 0.09397300  | -2.93379800 |
| H | -1.87884400 | -1.32348000 | -1.91430400 |
| H | -3.55538700 | -0.80578100 | -2.20580200 |

### Compound 2a, conformation c1

|   |             |             |             |
|---|-------------|-------------|-------------|
| C | -1.70045700 | 4.00093000  | -0.46499000 |
| C | -1.31501800 | 2.71041900  | -0.06264900 |
| C | 0.07678700  | 2.40791200  | 0.04343500  |
| C | 1.00790300  | 3.43331300  | -0.20992600 |
| C | 0.58789900  | 4.69876300  | -0.60419800 |
| C | -0.77142800 | 4.99267700  | -0.74867200 |
| N | 0.44858800  | 1.13684400  | 0.45569800  |
| C | 1.64909300  | 0.45869300  | 0.30331000  |
| C | 2.61887700  | 0.77171300  | -0.67374900 |
| C | 3.77683400  | 0.01518800  | -0.78374600 |
| C | 3.98040800  | -1.06873700 | 0.07115200  |
| C | 3.02697900  | -1.41452400 | 1.03236900  |
| C | 1.87578100  | -0.65442500 | 1.14557000  |
| C | -2.38527700 | 1.76007500  | 0.24449900  |
| N | -2.21471900 | 0.57579700  | 0.70410000  |
| C | -3.39611800 | -0.24436900 | 0.97551900  |
| C | -3.40348000 | -0.62521100 | 2.46681900  |
| C | -3.40726700 | -1.47942100 | 0.08120200  |
| C | -4.58212600 | -1.85085200 | -0.58167600 |
| C | -4.62448800 | -2.99980300 | -1.37422100 |
| C | -3.48458100 | -3.79040200 | -1.51948200 |
| C | -2.30473200 | -3.42484500 | -0.86706400 |
| C | -2.26714200 | -2.27977000 | -0.07218800 |
| H | -3.40100200 | 2.14489300  | 0.06111000  |
| N | 5.19979300  | -1.85787400 | -0.04687900 |
| O | 5.33572000  | -2.82540900 | 0.70733500  |
| O | 6.02901900  | -1.51632300 | -0.89475300 |
| H | -2.76347200 | 4.21598100  | -0.54887600 |
| H | 2.06396000  | 3.24439300  | -0.06056000 |
| H | 1.33360600  | 5.46757000  | -0.78808800 |
| H | -1.09564100 | 5.98018200  | -1.06125000 |
| H | -0.34375100 | 0.58615900  | 0.80350500  |
| H | 2.44598300  | 1.57991600  | -1.37316700 |
| H | 4.52138800  | 0.24160500  | -1.53723100 |
| H | 3.20854600  | -2.26303100 | 1.68054800  |
| H | 1.13757300  | -0.89987300 | 1.90411400  |
| H | -4.31157100 | 0.33362800  | 0.76368100  |
| H | -3.42881000 | 0.27338700  | 3.09304500  |
| H | -4.27996200 | -1.23961400 | 2.69718800  |
| H | -2.50603900 | -1.19837100 | 2.72158100  |
| H | -5.47345500 | -1.23549600 | -0.47780300 |
| H | -5.54652800 | -3.27166100 | -1.88141700 |
| H | -3.51255400 | -4.68260300 | -2.13915600 |
| H | -1.41020200 | -4.03187700 | -0.97931400 |
| H | -1.34230900 | -1.99863100 | 0.42310900  |

### Compound 2a, conformation c2

|   |             |            |             |
|---|-------------|------------|-------------|
| C | 1.39411300  | 4.06210900 | 0.07224300  |
| C | 1.08208400  | 2.70083600 | -0.08763700 |
| C | -0.21790400 | 2.24231200 | 0.28657200  |

|   |             |             |             |
|---|-------------|-------------|-------------|
| C | -1.11829900 | 3.16626300  | 0.85116400  |
| C | -0.77234900 | 4.50511400  | 0.99510300  |
| C | 0.48388800  | 4.97062200  | 0.59473000  |
| N | -0.51290300 | 0.89549400  | 0.13890500  |
| C | -1.73704500 | 0.24405200  | 0.09580700  |
| C | -1.74297300 | -1.14412500 | 0.36370500  |
| C | -2.91348100 | -1.87999700 | 0.29870400  |
| C | -4.10727900 | -1.23408200 | -0.03324600 |
| C | -4.12927700 | 0.13189200  | -0.31749000 |
| C | -2.95360500 | 0.86652300  | -0.25877900 |
| C | 2.13644400  | 1.83270000  | -0.61392900 |
| N | 2.04900100  | 0.56143100  | -0.75341300 |
| C | 3.20196200  | -0.16073800 | -1.29585400 |
| C | 2.82331900  | -0.75049700 | -2.66609300 |
| C | 3.65086400  | -1.23695800 | -0.31440200 |
| C | 4.96823800  | -1.25794000 | 0.15463800  |
| C | 5.39842000  | -2.25052200 | 1.03829300  |
| C | 4.50953000  | -3.23479500 | 1.46932200  |
| C | 3.18989200  | -3.22104400 | 1.01028400  |
| C | 2.76563700  | -2.23090800 | 0.12540700  |
| H | 3.06435400  | 2.35995300  | -0.88716400 |
| N | -5.34549300 | -2.00035000 | -0.09307100 |
| O | -5.28631100 | -3.21090500 | 0.14018500  |
| O | -6.38487900 | -1.39727900 | -0.37440400 |
| H | 2.38554200  | 4.39897500  | -0.22257200 |
| H | -2.08007900 | 2.82265300  | 1.21175800  |
| H | -1.49065500 | 5.18968900  | 1.43825700  |
| H | 0.74901500  | 6.01734600  | 0.70452100  |
| H | 0.31337600  | 0.32900300  | -0.08115100 |
| H | -0.81221100 | -1.62947400 | 0.64413700  |
| H | -2.92482700 | -2.94193800 | 0.51133900  |
| H | -5.06544700 | 0.59875400  | -0.59853000 |
| H | -2.97001200 | 1.91506200  | -0.52852500 |
| H | 4.04479600  | 0.53519300  | -1.44441900 |
| H | 3.66794800  | -1.30716100 | -3.08525200 |
| H | 1.97215000  | -1.43261600 | -2.57500400 |
| H | 2.54768800  | 0.04864600  | -3.36269900 |
| H | 5.66580200  | -0.49037500 | -0.17381100 |
| H | 6.42651700  | -2.25048000 | 1.39076300  |
| H | 4.84003500  | -4.00693500 | 2.15876500  |
| H | 2.49066800  | -3.98410700 | 1.34232200  |
| H | 1.73755400  | -2.22765700 | -0.22718600 |

### Compound 2a, conformation c3

|   |             |            |             |
|---|-------------|------------|-------------|
| C | 1.71885500  | 3.07502300 | -0.08236900 |
| C | 1.10484300  | 1.81473000 | 0.01932600  |
| C | -0.30557800 | 1.75135700 | 0.23602400  |
| C | -1.01536100 | 2.95688200 | 0.39648800  |
| C | -0.37144100 | 4.18506300 | 0.29357300  |
| C | 1.00124500  | 4.25752300 | 0.03897100  |
| N | -0.90347900 | 0.50378400 | 0.34327600  |
| C | -2.22799600 | 0.12666900 | 0.18326200  |
| C | -3.19044400 | 0.88263600 | -0.52146100 |

|   |             |             |             |
|---|-------------|-------------|-------------|
| C | -4.48782300 | 0.41246600  | -0.66567000 |
| C | -4.84299100 | -0.82119100 | -0.11867800 |
| C | -3.90452900 | -1.60116600 | 0.56266100  |
| C | -2.61271800 | -1.12782900 | 0.71109900  |
| C | 1.97708500  | 0.64153100  | -0.08737100 |
| N | 1.58915500  | -0.56731200 | 0.09178800  |
| C | 2.51273100  | -1.70817800 | -0.04643400 |
| C | 2.21709300  | -2.69486500 | 1.09573200  |
| C | 3.99575300  | -1.37630500 | -0.16358600 |
| C | 4.73055300  | -0.89895400 | 0.93284800  |
| C | 6.08910200  | -0.60847500 | 0.81081500  |
| C | 6.73966500  | -0.79035400 | -0.41205200 |
| C | 6.02047800  | -1.25922400 | -1.51134900 |
| C | 4.65936700  | -1.54514600 | -1.38506800 |
| H | 3.02229300  | 0.87609000  | -0.32342100 |
| N | -6.20763500 | -1.30798300 | -0.26929600 |
| O | -7.01552900 | -0.58887300 | -0.86421300 |
| O | -6.48154700 | -2.41397400 | 0.20573700  |
| H | 2.79201400  | 3.10909200  | -0.25665300 |
| H | -2.07041200 | 2.92703100  | 0.63979000  |
| H | -0.94961800 | 5.09561000  | 0.42659200  |
| H | 1.50006500  | 5.21770200  | -0.04681500 |
| H | -0.21622000 | -0.25574600 | 0.42121600  |
| H | -2.91137600 | 1.81747700  | -0.99083300 |
| H | -5.22945100 | 0.98153600  | -1.21297200 |
| H | -4.20512600 | -2.55761300 | 0.97244300  |
| H | -1.87926700 | -1.71739500 | 1.25411200  |
| H | 2.21293500  | -2.20229000 | -0.98188300 |
| H | 2.45214400  | -2.25559600 | 2.07080800  |
| H | 1.15550500  | -2.96227300 | 1.09353900  |
| H | 2.81028400  | -3.60727000 | 0.97805100  |
| H | 4.23749300  | -0.75099900 | 1.89027000  |
| H | 6.64147000  | -0.24233900 | 1.67228700  |
| H | 7.79911100  | -0.56763000 | -0.50563200 |
| H | 6.51643200  | -1.40406600 | -2.46746000 |
| H | 4.10471300  | -1.91114200 | -2.24657100 |

### Compound 2a, conformation c4

|   |             |             |             |
|---|-------------|-------------|-------------|
| C | 1.74848800  | 3.11482400  | 0.00724000  |
| C | 1.13261600  | 1.86448100  | -0.17436800 |
| C | -0.28865500 | 1.80960500  | -0.30537000 |
| C | -1.01076900 | 3.01840400  | -0.30386500 |
| C | -0.36488800 | 4.23701300  | -0.12629800 |
| C | 1.02125300  | 4.29711500  | 0.04489600  |
| N | -0.88881500 | 0.57262100  | -0.49295200 |
| C | -2.19799200 | 0.16893100  | -0.28097600 |
| C | -3.11336000 | 0.84541200  | 0.55505300  |
| C | -4.39596300 | 0.35019300  | 0.74133100  |
| C | -4.78258600 | -0.83028900 | 0.10549500  |
| C | -3.88965400 | -1.53278500 | -0.70843900 |
| C | -2.61284200 | -1.03418400 | -0.89821900 |
| C | 2.01306400  | 0.69422000  | -0.23750700 |
| N | 1.61650600  | -0.49576400 | -0.50304000 |
| C | 2.55711200  | -1.62768700 | -0.59067300 |

|   |             |             |             |
|---|-------------|-------------|-------------|
| C | 1.91084500  | -2.83295700 | 0.11321500  |
| C | 3.98276300  | -1.36941600 | -0.11771500 |
| C | 4.28649600  | -1.20371200 | 1.24254800  |
| C | 5.59784200  | -0.97690000 | 1.65951600  |
| C | 6.63206200  | -0.91191500 | 0.72257900  |
| C | 6.34383400  | -1.06998700 | -0.63296700 |
| C | 5.02849800  | -1.29286400 | -1.04589300 |
| H | 3.07096700  | 0.91433000  | -0.04883900 |
| N | -6.13173400 | -1.34338000 | 0.30137000  |
| O | -6.89983400 | -0.69225200 | 1.01539300  |
| O | -6.43317300 | -2.40231500 | -0.25692800 |
| H | 2.83059100  | 3.14185700  | 0.11455000  |
| H | -2.07930500 | 3.00217100  | -0.48059900 |
| H | -0.95289600 | 5.15093000  | -0.13462100 |
| H | 1.52207200  | 5.24927400  | 0.18878100  |
| H | -0.20577200 | -0.16956600 | -0.68792000 |
| H | -2.80688100 | 1.73507600  | 1.09050700  |
| H | -5.10092800 | 0.85752900  | 1.38865300  |
| H | -4.21370600 | -2.44941800 | -1.18576300 |
| H | -1.91591300 | -1.56211100 | -1.54316800 |
| H | 2.60682500  | -1.87056200 | -1.66199600 |
| H | 1.79282100  | -2.64949400 | 1.18614500  |
| H | 0.91769800  | -3.02362400 | -0.30584700 |
| H | 2.52668700  | -3.72860300 | -0.01647700 |
| H | 3.49204000  | -1.25072100 | 1.98299000  |
| H | 5.81316900  | -0.85369400 | 2.71768200  |
| H | 7.65424100  | -0.73923600 | 1.04834400  |
| H | 7.14064300  | -1.02119000 | -1.37042300 |
| H | 4.81102000  | -1.41574700 | -2.10486800 |

### Compound 2b, conformation c1

|   |             |             |             |
|---|-------------|-------------|-------------|
| C | 2.07429600  | 3.88367500  | 0.44646000  |
| C | 1.58098400  | 2.63471000  | 0.03180100  |
| C | 0.16819500  | 2.44944000  | -0.06778700 |
| C | -0.67297800 | 3.54604000  | 0.20153400  |
| C | -0.14722600 | 4.76794900  | 0.60670800  |
| C | 1.23236300  | 4.94604600  | 0.74675100  |
| N | -0.30944700 | 1.21638900  | -0.48798800 |
| C | -1.56152200 | 0.63935300  | -0.33664900 |
| C | -1.87993800 | -0.44896700 | -1.18201600 |
| C | -3.09101100 | -1.10964900 | -1.07207400 |
| C | -4.01329400 | -0.68841900 | -0.11032500 |
| C | -3.71946200 | 0.37080000  | 0.74917500  |
| C | -2.50207100 | 1.02794100  | 0.64222000  |
| C | 2.56657900  | 1.60219300  | -0.29560300 |
| N | 2.29401900  | 0.44490600  | -0.77430500 |
| C | 3.39158600  | -0.46966600 | -1.07911400 |
| C | 3.43384400  | -0.69862500 | -2.59776900 |
| C | 3.25986500  | -1.78736700 | -0.26917000 |
| C | 3.42687100  | -1.54024600 | 1.24260100  |
| C | 3.38247500  | -2.84704400 | 2.04958000  |
| C | 2.09575600  | -3.63624300 | 1.76800100  |
| C | 1.91795200  | -3.88648700 | 0.26370300  |
| C | 1.96361800  | -2.57641300 | -0.54066000 |
| H | 3.61261200  | 1.89645100  | -0.11259300 |
| N | -5.29481600 | -1.37206700 | 0.00372700  |
| O | -5.51239100 | -2.32024600 | -0.75603000 |
| O | -6.09236300 | -0.96653800 | 0.85401000  |
| H | 3.15201100  | 4.00867100  | 0.52553400  |
| H | -1.74174400 | 3.44786100  | 0.05582100  |
| H | -0.82556200 | 5.59404500  | 0.80271700  |
| H | 1.63922100  | 5.89957700  | 1.06814500  |
| H | 0.43239600  | 0.60889300  | -0.85455700 |
| H | -1.16216700 | -0.75656300 | -1.93719500 |
| H | -3.34208800 | -1.93831500 | -1.72269900 |
| H | -4.44274200 | 0.65617600  | 1.50337400  |
| H | -2.26288300 | 1.81602300  | 1.34496500  |
| H | 4.35100100  | -0.00840300 | -0.78082800 |
| H | 2.47789800  | -1.07844100 | -2.97098800 |
| H | 3.64631100  | 0.24047000  | -3.11967700 |
| H | 4.21782200  | -1.41974400 | -2.85566500 |
| H | 4.10507300  | -2.41529000 | -0.59549800 |
| H | 2.62351300  | -0.87434900 | 1.58774100  |
| H | 4.37265600  | -1.01304500 | 1.43139800  |
| H | 3.47036200  | -2.62894600 | 3.12156800  |
| H | 4.25240100  | -3.46665200 | 1.78517800  |
| H | 1.23271900  | -3.06738100 | 2.14425400  |
| H | 2.10473100  | -4.58808000 | 2.31409100  |
| H | 2.71749900  | -4.55536200 | -0.08856300 |
| H | 0.97104100  | -4.40742800 | 0.07345300  |
| H | 1.86618600  | -2.79997500 | -1.61012900 |
| H | 1.10017800  | -1.95463300 | -0.26794100 |

### Compound 2b, conformation c2

|   |             |             |             |
|---|-------------|-------------|-------------|
| C | -1.02549600 | 4.21684900  | -0.45921400 |
| C | -0.79634500 | 2.89161100  | -0.05131000 |
| C | 0.54977500  | 2.42704800  | 0.06046800  |
| C | 1.59589400  | 3.33596800  | -0.18892900 |
| C | 1.32952800  | 4.64150100  | -0.58673600 |
| C | 0.01501200  | 5.09231500  | -0.73961200 |
| N | 0.76782100  | 1.11963100  | 0.47105600  |
| C | 1.88140900  | 0.30636600  | 0.32313400  |
| C | 1.96848200  | -0.83089600 | 1.15918600  |
| C | 3.02477800  | -1.71845800 | 1.05196300  |
| C | 4.02177700  | -1.48097000 | 0.10185100  |
| C | 3.95313000  | -0.37696500 | -0.74873000 |
| C | 2.88997600  | 0.50848800  | -0.64426900 |
| C | -1.97191100 | 2.07408200  | 0.25636900  |
| N | -1.93915200 | 0.88670700  | 0.73726700  |
| C | -3.19799800 | 0.20345800  | 1.03131200  |
| C | -3.30504800 | 0.06165100  | 2.55832300  |
| C | -3.23577400 | -1.15457600 | 0.28418800  |
| C | -4.52556200 | -1.94917200 | 0.57632400  |
| C | -4.57626400 | -3.27987900 | -0.19283100 |
| C | -4.40046000 | -3.07556700 | -1.70326000 |
| C | -3.11257600 | -2.29700600 | -2.00251600 |
| C | -3.06495300 | -0.96614900 | -1.23704500 |
| H | -2.93618800 | 2.56744100  | 0.05481300  |
| N | 5.14235900  | -2.40533300 | -0.00955400 |
| O | 6.01289300  | -2.15958200 | -0.84938600 |
| O | 5.15935900  | -3.38455500 | 0.74179400  |
| H | -2.05558300 | 4.55496300  | -0.54849600 |
| H | 2.62173100  | 3.02505400  | -0.03349200 |
| H | 2.16136600  | 5.31716500  | -0.76706200 |
| H | -0.18956100 | 6.11032400  | -1.05562900 |
| H | -0.08346600 | 0.66814500  | 0.82495300  |
| H | 1.19624700  | -0.99594700 | 1.90531500  |
| H | 3.09956100  | -2.58629900 | 1.69563300  |
| H | 4.72597000  | -0.23480500 | -1.49430900 |
| H | 2.81925300  | 1.33467900  | -1.34038400 |
| H | -4.04842100 | 0.81437400  | 0.67574200  |
| H | -4.26861400 | -0.36326600 | 2.85336800  |
| H | -2.50756500 | -0.58382600 | 2.94414800  |
| H | -3.20734100 | 1.04153400  | 3.03715000  |
| H | -2.38034400 | -1.74482500 | 0.65018600  |
| H | -5.39552400 | -1.33540800 | 0.29449800  |
| H | -4.62067400 | -2.15087300 | 1.64928800  |
| H | -5.52355000 | -3.79260700 | 0.01742200  |
| H | -3.77716700 | -3.93903700 | 0.17742000  |
| H | -5.26259900 | -2.51665100 | -2.09698100 |
| H | -4.39268200 | -4.04343000 | -2.22040900 |
| H | -2.24470200 | -2.90947000 | -1.71651000 |
| H | -3.01870500 | -2.11058000 | -3.07990700 |
| H | -2.12153200 | -0.44955000 | -1.44408700 |
| H | -3.86936900 | -0.30923800 | -1.60529400 |

### Compound 2b, conformation c3



|   |             |             |             |
|---|-------------|-------------|-------------|
| C | 1.28777200  | 3.91329000  | 0.17839100  |
| C | 0.92306500  | 2.59192900  | -0.13177400 |
| C | -0.46383800 | 2.25705800  | -0.20141900 |
| C | -1.41133500 | 3.28128500  | -0.01151600 |
| C | -1.01168000 | 4.57862400  | 0.28965600  |
| C | 0.34296100  | 4.90583000  | 0.40158900  |
| N | -0.81577800 | 0.95216800  | -0.51528100 |
| C | -2.00260300 | 0.26682800  | -0.30213800 |
| C | -2.97274300 | 0.63693600  | 0.65475800  |
| C | -4.11711600 | -0.12798700 | 0.82954500  |
| C | -4.30668900 | -1.27705300 | 0.06096200  |
| C | -3.35126800 | -1.67991000 | -0.87602900 |
| C | -2.21354900 | -0.91236300 | -1.05366600 |
| C | 2.00761000  | 1.64171400  | -0.38790800 |
| N | 1.85123600  | 0.43213400  | -0.78157600 |
| C | 3.03369200  | -0.39046200 | -1.03806600 |
| C | 3.12004500  | -0.62041700 | -2.55591000 |
| C | 2.90939100  | -1.71596700 | -0.23517400 |
| C | 4.09142100  | -2.68794600 | -0.45756600 |
| C | 5.39298200  | -2.22426600 | 0.21906400  |
| C | 5.18494800  | -1.97877200 | 1.72151600  |
| C | 4.02081000  | -1.00894100 | 1.97672200  |
| C | 2.73158000  | -1.47966800 | 1.28248500  |
| H | 3.01857700  | 2.05062800  | -0.23012800 |
| N | -5.51207000 | -2.07430600 | 0.24571700  |
| O | -6.34226200 | -1.68376100 | 1.07142700  |
| O | -5.63667200 | -3.09753800 | -0.43334000 |
| H | 2.34738300  | 4.15250100  | 0.23663700  |
| H | -2.46491800 | 3.06397900  | -0.13765700 |
| H | -1.77003200 | 5.34497200  | 0.42605600  |
| H | 0.65155000  | 5.91819800  | 0.64227600  |
| H | -0.01819100 | 0.39369900  | -0.84051700 |
| H | -2.81073500 | 1.49912700  | 1.28922900  |
| H | -4.86174200 | 0.14327900  | 1.56800500  |
| H | -3.52059300 | -2.57938400 | -1.45509800 |
| H | -1.47169300 | -1.20648100 | -1.79083600 |
| H | 3.93862800  | 0.15400100  | -0.72055000 |
| H | 4.03414700  | -1.15601200 | -2.82800500 |
| H | 2.25988700  | -1.20068400 | -2.90938500 |
| H | 3.12146800  | 0.33819400  | -3.08514000 |
| H | 1.99547400  | -2.20127000 | -0.60748200 |
| H | 4.25944100  | -2.86886200 | -1.52520100 |
| H | 3.80533300  | -3.65958300 | -0.02990300 |
| H | 5.75635700  | -1.30118300 | -0.25518700 |
| H | 6.17720900  | -2.97605900 | 0.06323200  |
| H | 6.10773200  | -1.59856000 | 2.17813100  |
| H | 4.96552400  | -2.93836600 | 2.21298600  |
| H | 3.84247300  | -0.90672900 | 3.05474100  |
| H | 4.29728400  | -0.00690500 | 1.61776100  |
| H | 2.41592500  | -2.42909700 | 1.73813900  |
| H | 1.91853100  | -0.76744200 | 1.46004700  |

**Compound 2b, conformation c4**

|   |             |             |             |
|---|-------------|-------------|-------------|
| C | 1.53027700  | 3.90270700  | -0.07611400 |
| C | 1.12805600  | 2.57425800  | 0.14383000  |
| C | -0.15818800 | 2.15959800  | -0.31714500 |
| C | -0.94716100 | 3.08394900  | -1.02822400 |
| C | -0.51116200 | 4.38829300  | -1.23387500 |
| C | 0.72768400  | 4.81571700  | -0.74739900 |
| N | -0.55197300 | 0.84641600  | -0.09728500 |
| C | -1.82254500 | 0.29281300  | -0.04504300 |
| C | -1.92259300 | -1.11441600 | -0.14505500 |
| C | -3.14792500 | -1.75232400 | -0.06433700 |
| C | -4.30470700 | -0.98896300 | 0.11559300  |
| C | -4.23509900 | 0.39954500  | 0.23528600  |
| C | -3.00508400 | 1.03704100  | 0.16050600  |
| C | 2.07989100  | 1.69407600  | 0.83034500  |
| N | 1.92746700  | 0.42911600  | 0.96738400  |
| C | 2.92115000  | -0.40294600 | 1.65178600  |
| C | 4.06456300  | 0.33642800  | 2.36217400  |
| C | 3.43955000  | -1.50747900 | 0.68359900  |
| C | 2.32235500  | -2.47175800 | 0.23992700  |
| C | 2.86348500  | -3.60566800 | -0.64510900 |
| C | 3.61491300  | -3.05404100 | -1.86542000 |
| C | 4.72492700  | -2.08221000 | -1.44018300 |
| C | 4.18215400  | -0.95347600 | -0.54775500 |
| H | 2.96437300  | 2.21493600  | 1.21785700  |
| N | -5.59900100 | -1.65284500 | 0.19091100  |
| O | -5.62191700 | -2.88415100 | 0.10527000  |
| O | -6.60227900 | -0.94863400 | 0.33707700  |
| H | 2.50741500  | 4.21001500  | 0.29037700  |
| H | -1.89121800 | 2.76384800  | -1.45224800 |
| H | -1.14376100 | 5.07387300  | -1.79137500 |
| H | 1.06319600  | 5.83618400  | -0.90306100 |
| H | 0.22317400  | 0.25315700  | 0.22237300  |
| H | -1.01877500 | -1.69716100 | -0.29910000 |
| H | -3.22916900 | -2.82916000 | -0.14761500 |
| H | -5.14537900 | 0.96239700  | 0.40262400  |
| H | -2.95598300 | 2.10928400  | 0.30189500  |
| H | 2.34995700  | -0.93329800 | 2.42894100  |
| H | 3.67969700  | 1.05410800  | 3.09545700  |
| H | 4.68338800  | -0.38801800 | 2.90184000  |
| H | 4.71900200  | 0.87716300  | 1.67039400  |
| H | 4.16122500  | -2.09640600 | 1.27213600  |
| H | 1.56454900  | -1.90732800 | -0.32052300 |
| H | 1.81747100  | -2.88854100 | 1.12223000  |
| H | 2.04052100  | -4.25713400 | -0.96566400 |
| H | 3.54534800  | -4.23414800 | -0.05307400 |
| H | 2.90446400  | -2.52733500 | -2.51968100 |
| H | 4.03509500  | -3.87629500 | -2.45836800 |
| H | 5.49984800  | -2.63701900 | -0.89043500 |
| H | 5.21664200  | -1.65523200 | -2.32352800 |
| H | 5.00928200  | -0.30126800 | -0.24040800 |
| H | 3.49051300  | -0.32999700 | -1.13121800 |

**Compound 2b, conformation c1'**

|   |             |            |            |
|---|-------------|------------|------------|
| C | -1.40035300 | 3.96526400 | 0.14785600 |
| C | -1.02777700 | 2.62077000 | 0.26921100 |

|   |             |             |             |
|---|-------------|-------------|-------------|
| C | 0.22913800  | 2.20751300  | -0.25187500 |
| C | 1.02109300  | 3.14850200  | -0.92373000 |
| C | 0.61715500  | 4.47142300  | -1.03309100 |
| C | -0.59124200 | 4.89522500  | -0.48508600 |
| N | 0.58401200  | 0.86750900  | -0.13075100 |
| C | 1.82268700  | 0.27092600  | -0.11283400 |
| C | 1.86287100  | -1.13887900 | -0.22200200 |
| C | 3.05491400  | -1.82291900 | -0.18602500 |
| C | 4.25023600  | -1.11323200 | -0.03689800 |
| C | 4.23724200  | 0.27545200  | 0.09541900  |
| C | 3.04106600  | 0.96148100  | 0.05920400  |
| C | -1.98737900 | 1.71849300  | 0.91241400  |
| N | -1.87103100 | 0.45061200  | 0.97190400  |
| C | -2.91569800 | -0.32090700 | 1.64327000  |
| C | -2.31009100 | -1.00867700 | 2.87176100  |
| C | -3.59600800 | -1.31502300 | 0.66956000  |
| C | -4.39775600 | -0.58471500 | -0.41995600 |
| C | -5.15186000 | -1.56138500 | -1.33054100 |
| C | -4.20659200 | -2.59529400 | -1.95168200 |
| C | -3.39646500 | -3.32391400 | -0.87425400 |
| C | -2.64417000 | -2.34163300 | 0.03387300  |
| H | -2.86380600 | 2.21892500  | 1.34424200  |
| N | 5.50264400  | -1.82193800 | -0.00658600 |
| O | 5.48754300  | -3.05575300 | -0.09389200 |
| O | 6.54976500  | -1.17329500 | 0.10666200  |
| H | -2.35528000 | 4.27263200  | 0.55939100  |
| H | 1.94213900  | 2.83928300  | -1.39540800 |
| H | 1.25070800  | 5.17322600  | -1.56208600 |
| H | -0.90174900 | 5.92897400  | -0.56543200 |
| H | -0.20947700 | 0.28158500  | 0.15751400  |
| H | 0.93578600  | -1.68429900 | -0.34630200 |
| H | 3.07572800  | -2.89877800 | -0.28019400 |
| H | 5.16596400  | 0.80762800  | 0.24168900  |
| H | 3.04992100  | 2.03051500  | 0.20375600  |
| H | -3.70284100 | 0.36383100  | 1.99406200  |
| H | -1.47088900 | -1.65010600 | 2.59823500  |
| H | -1.94633600 | -0.26405800 | 3.58277800  |
| H | -3.06378600 | -1.62020700 | 3.37323600  |
| H | -4.31565200 | -1.86987800 | 1.28682400  |
| H | -3.71392500 | 0.01850000  | -1.02811200 |
| H | -5.10169000 | 0.11372400  | 0.04503700  |
| H | -5.67907900 | -1.00968000 | -2.11473100 |
| H | -5.91981900 | -2.08132200 | -0.74485500 |
| H | -3.51821000 | -2.08756500 | -2.63841100 |
| H | -4.77264000 | -3.31435200 | -2.55160200 |
| H | -4.07468000 | -3.93255100 | -0.26361600 |
| H | -2.68833100 | -4.01774400 | -1.33738000 |
| H | -2.10700600 | -2.89694000 | 0.80704600  |
| H | -1.88896500 | -1.81307500 | -0.55737700 |

**Compound 2b, conformation c2'**

|   |             |            |             |
|---|-------------|------------|-------------|
| C | -1.01480900 | 4.21598600 | -0.49601500 |
| C | -0.77997600 | 2.90161400 | -0.07360200 |
| C | 0.56342100  | 2.45637200 | 0.06893100  |
| C | 1.60220200  | 3.36918200 | -0.15934400 |

|   |             |             |             |
|---|-------------|-------------|-------------|
| C | 1.33289100  | 4.66672700  | -0.57056700 |
| C | 0.02161700  | 5.09785000  | -0.75705200 |
| N | 0.78092400  | 1.15182700  | 0.49969100  |
| C | 1.86772500  | 0.32509900  | 0.34105200  |
| C | 1.89584400  | -0.85821800 | 1.11590900  |
| C | 2.92836600  | -1.75897500 | 1.00379600  |
| C | 3.96941600  | -1.50243400 | 0.10638500  |
| C | 3.95472000  | -0.35434100 | -0.68597000 |
| C | 2.91849300  | 0.54922400  | -0.57348300 |
| C | -1.95528500 | 2.07713600  | 0.22227000  |
| N | -1.91858500 | 0.90664100  | 0.72484300  |
| C | -3.17711800 | 0.21624500  | 1.00860500  |
| C | -3.30762900 | 0.09269700  | 2.53173500  |
| C | -3.19724800 | -1.14760800 | 0.27893800  |
| C | -4.47878700 | -1.94734300 | 0.57534100  |
| C | -4.51651600 | -3.28527300 | -0.17504700 |
| C | -4.33559700 | -3.10180200 | -1.68427200 |
| C | -3.05828300 | -2.31437100 | -1.98918500 |
| C | -3.02522800 | -0.97691700 | -1.24078300 |
| H | -2.91583800 | 2.55571100  | -0.00757100 |
| N | 5.05857300  | -2.43624600 | -0.00970900 |
| O | 5.97920400  | -2.18053200 | -0.79530700 |
| O | 5.03496900  | -3.46290200 | 0.67990000  |
| H | -2.04242000 | 4.54207700  | -0.61177300 |
| H | 2.62623100  | 3.07640000  | 0.01916600  |
| H | 2.15851400  | 5.34861300  | -0.73533500 |
| H | -0.18633400 | 6.10851200  | -1.08388100 |
| H | -0.07908700 | 0.71057100  | 0.84870100  |
| H | 1.09218300  | -1.04777100 | 1.81663600  |
| H | 2.94631100  | -2.65476700 | 1.60713500  |
| H | 4.74957900  | -0.18546100 | -1.39787000 |
| H | 2.90505100  | 1.40934100  | -1.22448600 |
| H | -4.01975700 | 0.81727800  | 0.63258300  |
| H | -4.27514400 | -0.32323600 | 2.81301300  |
| H | -2.52236200 | -0.55058500 | 2.93700600  |
| H | -3.21704700 | 1.07578300  | 2.99773100  |
| H | -2.34152300 | -1.72462200 | 0.65540400  |
| H | -5.34953400 | -1.34553000 | 0.28408100  |
| H | -4.57389000 | -2.13610000 | 1.64664100  |
| H | -5.45946300 | -3.79862200 | 0.03597700  |
| H | -3.71765900 | -3.93264400 | 0.20677600  |
| H | -5.19946000 | -2.56052800 | -2.08937200 |
| H | -4.31268000 | -4.07451500 | -2.18484600 |
| H | -2.18721700 | -2.91296100 | -1.69576200 |
| H | -2.96641800 | -2.13926400 | -3.06539500 |
| H | -2.08878700 | -0.45706600 | -1.45436200 |
| H | -3.83232000 | -0.33381300 | -1.61657800 |

**Compound 2b, conformation c3'**

|   |             |            |             |
|---|-------------|------------|-------------|
| C | -1.21083500 | 3.76539100 | 0.40547000  |
| C | -0.82445200 | 2.42075800 | 0.34321500  |
| C | 0.48861800  | 2.10397000 | -0.10272400 |
| C | 1.32594500  | 3.14679200 | -0.52225300 |
| C | 0.90791400  | 4.46801700 | -0.45310600 |
| C | -0.35961600 | 4.79068700 | 0.02578600  |

|   |             |             |             |
|---|-------------|-------------|-------------|
| N | 0.85457800  | 0.76373400  | -0.16911500 |
| C | 2.09510200  | 0.17165000  | -0.14814200 |
| C | 3.28560700  | 0.81886400  | 0.24497000  |
| C | 4.48303300  | 0.13423700  | 0.26251700  |
| C | 4.52435700  | -1.21013000 | -0.10762800 |
| C | 3.35469500  | -1.88071100 | -0.47787000 |
| C | 2.16148300  | -1.19800500 | -0.49581700 |
| C | -1.82829400 | 1.42143900  | 0.72027700  |
| N | -1.68256200 | 0.16052500  | 0.60530000  |
| C | -2.77368900 | -0.72085400 | 1.02619600  |
| C | -2.31267100 | -1.46685100 | 2.28473100  |
| C | -3.12833000 | -1.67714900 | -0.14254900 |
| C | -4.22893400 | -2.70042800 | 0.20778600  |
| C | -5.62778300 | -2.07647900 | 0.31108200  |
| C | -5.99863000 | -1.32102100 | -0.97071400 |
| C | -4.92822900 | -0.28801300 | -1.34240400 |
| C | -3.53397600 | -0.92487400 | -1.42744000 |
| H | -2.76527500 | 1.84247400  | 1.10671200  |
| N | 5.77903300  | -1.91555400 | -0.09678400 |
| O | 6.80555700  | -1.29742500 | 0.21013400  |
| O | 5.78621500  | -3.11619000 | -0.39424200 |
| H | -2.21012800 | 3.99649100  | 0.75717000  |
| H | 2.29697000  | 2.92439600  | -0.93914700 |
| H | 1.57832300  | 5.25029400  | -0.78830300 |
| H | -0.68167600 | 5.82231500  | 0.08497200  |
| H | 0.04856600  | 0.13572700  | -0.05823400 |
| H | 3.26880600  | 1.84589600  | 0.57466100  |
| H | 5.38942100  | 0.63055700  | 0.57749200  |
| H | 3.39709700  | -2.92380300 | -0.75527200 |
| H | 1.25447500  | -1.71031200 | -0.79181100 |
| H | -3.64987300 | -0.11321300 | 1.28901300  |
| H | -3.11988000 | -2.06540300 | 2.70756400  |
| H | -1.47302000 | -2.12887000 | 2.05770800  |
| H | -1.98969100 | -0.75515300 | 3.04691800  |
| H | -2.20837300 | -2.23364100 | -0.35695000 |
| H | -3.98480200 | -3.24008800 | 1.12504500  |
| H | -4.24359000 | -3.45269700 | -0.58937100 |
| H | -5.67089500 | -1.38995700 | 1.16406100  |
| H | -6.36412900 | -2.86037400 | 0.51232900  |
| H | -6.97259600 | -0.83540600 | -0.85750400 |
| H | -6.10113600 | -2.04112000 | -1.79197500 |
| H | -5.17482800 | 0.18192100  | -2.29929600 |
| H | -4.92820300 | 0.51667300  | -0.59857400 |
| H | -3.52890000 | -1.64452700 | -2.25421300 |
| H | -2.78607200 | -0.16794400 | -1.67423700 |

**Compound 2b, conformation c4'**

|   |             |            |             |
|---|-------------|------------|-------------|
| C | 1.50203600  | 3.90477900 | -0.01327600 |
| C | 1.09656900  | 2.57756900 | 0.17336600  |
| C | -0.17116000 | 2.17304700 | -0.32687200 |
| C | -0.93938000 | 3.09925600 | -1.04501400 |
| C | -0.50190200 | 4.40439700 | -1.22036200 |
| C | 0.71712400  | 4.82301100 | -0.69277700 |
| N | -0.56245200 | 0.85040900 | -0.13772600 |
| C | -1.81762500 | 0.29474000 | -0.07099200 |

|   |             |             |             |
|---|-------------|-------------|-------------|
| C | -1.90286700 | -1.11731500 | -0.09752300 |
| C | -3.11459000 | -1.76057900 | -0.00951900 |
| C | -4.28600500 | -1.00656300 | 0.11037300  |
| C | -4.22859200 | 0.38649800  | 0.16131600  |
| C | -3.01271800 | 1.03160400  | 0.07281100  |
| C | 2.03617300  | 1.68510600  | 0.86408500  |
| N | 1.88912700  | 0.42273900  | 0.95805000  |
| C | 2.87339100  | -0.42105500 | 1.64482600  |
| C | 3.99113300  | 0.30951800  | 2.39426400  |
| C | 3.42006600  | -1.50110100 | 0.67085200  |
| C | 2.32886500  | -2.47576400 | 0.20059300  |
| C | 2.90261900  | -3.59175800 | -0.68109200 |
| C | 3.66953200  | -3.02120400 | -1.87912600 |
| C | 4.75150800  | -2.03468800 | -1.42722600 |
| C | 4.17504600  | -0.92444700 | -0.53782000 |
| H | 2.90416300  | 2.19929100  | 1.28513800  |
| N | -5.55872700 | -1.67240400 | 0.19490800  |
| O | -5.58277700 | -2.90925700 | 0.18180700  |
| O | -6.58437300 | -0.98572400 | 0.27854400  |
| H | 2.46418800  | 4.20839900  | 0.38411600  |
| H | -1.86855200 | 2.78997000  | -1.50067500 |
| H | -1.11739400 | 5.09515300  | -1.78408300 |
| H | 1.05435900  | 5.84320000  | -0.82352600 |
| H | 0.22055500  | 0.26038900  | 0.17337100  |
| H | -0.99463000 | -1.69793300 | -0.19905000 |
| H | -3.16932100 | -2.83895200 | -0.04067300 |
| H | -5.13872600 | 0.95508600  | 0.28586800  |
| H | -2.98737100 | 2.10706100  | 0.15391300  |
| H | 2.28788500  | -0.96988400 | 2.39284000  |
| H | 3.58602700  | 1.00279900  | 3.13499000  |
| H | 4.59980300  | -0.42369900 | 2.92653700  |
| H | 4.65330100  | 0.87089400  | 1.73238300  |
| H | 4.13814300  | -2.08278600 | 1.26358800  |
| H | 1.57359100  | -1.92423000 | -0.36871300 |
| H | 1.81867400  | -2.90670000 | 1.06839800  |
| H | 2.09734600  | -4.24842600 | -1.02398800 |
| H | 3.57928600  | -4.21387200 | -0.08255300 |
| H | 2.96625900  | -2.50507200 | -2.54414300 |
| H | 4.11606300  | -3.83082600 | -2.46432300 |
| H | 5.52401100  | -2.57812100 | -0.86950400 |
| H | 5.24841300  | -1.59330700 | -2.29645400 |
| H | 4.98227500  | -0.26460900 | -0.20845800 |
| H | 3.48786400  | -0.30950300 | -1.12975500 |

### Compound 2f, conformation c1

|   |             |             |             |
|---|-------------|-------------|-------------|
| C | 0.49551400  | 4.37655100  | -0.10697900 |
| C | 0.38938700  | 2.97506800  | -0.13339900 |
| C | -0.86282700 | 2.36989400  | 0.19660300  |
| C | -1.92651300 | 3.20542100  | 0.58971700  |
| C | -1.78202400 | 4.58807400  | 0.60612100  |
| C | -0.57292200 | 5.19010200  | 0.24412100  |
| N | -0.95532300 | 0.98682400  | 0.17856400  |
| C | -2.06684900 | 0.15873800  | 0.11705400  |
| C | -1.88983400 | -1.18876500 | 0.50767700  |
| C | -2.93352600 | -2.09507800 | 0.44003000  |
| C | -4.18144400 | -1.66576800 | -0.02007600 |
| C | -4.38013100 | -0.34690700 | -0.42970500 |
| C | -3.33098400 | 0.55923800  | -0.36743100 |
| C | 1.59485600  | 2.22055700  | -0.47761800 |
| H | 2.46328900  | 2.84199800  | -0.74928100 |
| N | -5.28780300 | -2.61193900 | -0.08406300 |
| O | -5.07153400 | -3.77671900 | 0.26227400  |
| O | -6.38032500 | -2.19747400 | -0.48180300 |
| H | 1.45269400  | 4.82313700  | -0.36733300 |
| H | -2.85853500 | 2.76368400  | 0.91994000  |
| H | -2.62304000 | 5.20127100  | 0.91870600  |
| H | -0.46569600 | 6.27009900  | 0.25315900  |
| H | -0.04183300 | 0.52851700  | 0.08042300  |
| H | -0.91927200 | -1.50614700 | 0.87870100  |
| H | -2.80512000 | -3.12607300 | 0.74596800  |
| H | -5.35079200 | -0.05114500 | -0.80877600 |
| H | -3.48016600 | 1.56690200  | -0.73419700 |
| N | 1.69028400  | 0.94153800  | -0.46399600 |
| C | 2.95564300  | 0.32626300  | -0.85373400 |
| C | 3.44647600  | -0.63242700 | 0.23400500  |
| C | 2.77491100  | -0.37708600 | -2.21024100 |
| H | 3.72352700  | 1.11189500  | -0.98441400 |
| C | 3.33503400  | -0.25596900 | 1.58033700  |
| C | 4.04996700  | -1.86232300 | -0.08766400 |
| C | 4.00639100  | -1.21979600 | -2.54990900 |
| H | 1.88357600  | -1.01666300 | -2.16106300 |
| H | 2.58342200  | 0.37999900  | -2.97969200 |
| C | 3.80666300  | -1.07529600 | 2.60231100  |
| H | 2.86503900  | 0.69192700  | 1.82642400  |
| C | 4.52489900  | -2.67559800 | 0.95146800  |
| C | 4.17501300  | -2.34408200 | -1.52279900 |
| H | 3.91483100  | -1.64120900 | -3.55776000 |
| H | 4.90017500  | -0.58021900 | -2.55471600 |
| C | 4.40727400  | -2.29532300 | 2.28525300  |
| H | 3.70753500  | -0.76358600 | 3.63865300  |
| H | 4.99356300  | -3.62544600 | 0.70144900  |
| H | 5.14007900  | -2.84810900 | -1.65897700 |
| H | 3.40751100  | -3.11132500 | -1.70708700 |
| H | 4.78414000  | -2.94385700 | 3.07172500  |

### Compound 2f, conformation c2

|   |             |             |             |
|---|-------------|-------------|-------------|
| C | 0.60816000  | 4.40822200  | 0.49392400  |
| C | 0.49951800  | 3.04218100  | 0.18062000  |
| C | -0.79423800 | 2.49245200  | -0.07658400 |
| C | -1.90381400 | 3.35992600  | -0.06505400 |
| C | -1.75576500 | 4.70764700  | 0.24274300  |
| C | -0.49915800 | 5.24404000  | 0.54011600  |
| N | -0.89407800 | 1.14397800  | -0.38496100 |
| C | -1.98289000 | 0.28635100  | -0.31829900 |
| C | -1.89596200 | -0.92657200 | -1.03969200 |
| C | -2.91943300 | -1.85710800 | -0.99994300 |
| C | -4.05719600 | -1.58771700 | -0.23443800 |
| C | -4.16198700 | -0.40849600 | 0.50380400  |
| C | -3.13196500 | 0.52064200  | 0.46785900  |
| C | 1.74133100  | 2.27075900  | 0.11818800  |
| H | 2.64262200  | 2.82656200  | 0.42298500  |
| N | -5.14416800 | -2.55734600 | -0.19728300 |
| O | -5.01003200 | -3.59953800 | -0.84481600 |
| O | -6.13944300 | -2.28400200 | 0.47973400  |
| H | 1.59822300  | 4.81041200  | 0.69741200  |
| H | -2.88121400 | 2.97961400  | -0.33533300 |
| H | -2.63369400 | 5.34813700  | 0.23794600  |
| H | -0.38820700 | 6.29523100  | 0.78644200  |
| H | 0.01713400  | 0.70972600  | -0.57150700 |
| H | -1.01220300 | -1.11936400 | -1.64120900 |
| H | -2.86004900 | -2.78418700 | -1.55669300 |
| H | -5.04311300 | -0.24099200 | 1.11117600  |
| H | -3.20037300 | 1.40953300  | 1.08207600  |
| N | 1.83064000  | 1.05182700  | -0.27070400 |
| C | 3.15016800  | 0.42896000  | -0.32712000 |
| C | 3.16851000  | -0.87560400 | 0.47358400  |
| C | 3.53976700  | 0.21286200  | -1.79973900 |
| H | 3.89868300  | 1.11040500  | 0.11925300  |
| C | 2.51895100  | -0.92695400 | 1.71525200  |
| C | 3.86387400  | -2.00971300 | 0.01465700  |
| C | 4.81166700  | -0.63189100 | -1.90368300 |
| H | 2.71072200  | -0.29136800 | -2.31426100 |
| H | 3.66772800  | 1.18990600  | -2.28038800 |
| C | 2.54699200  | -2.07680600 | 2.49945900  |
| H | 1.97737600  | -0.05260700 | 2.06457200  |
| C | 3.88834400  | -3.15950900 | 0.81710700  |
| C | 4.56208600  | -2.03203700 | -1.33418200 |
| H | 5.13937900  | -0.70246400 | -2.94746300 |
| H | 5.62470500  | -0.14205400 | -1.34968100 |
| C | 3.23820400  | -3.20247300 | 2.04706800  |
| H | 2.03321300  | -2.09454000 | 3.45683900  |
| H | 4.42835300  | -4.03523100 | 0.46229900  |
| H | 5.50484900  | -2.58731000 | -1.25165200 |
| H | 3.94176800  | -2.59907900 | -2.04516900 |
| H | 3.27216200  | -4.10618400 | 2.64977400  |



## 8. References

- <sup>1</sup> C. F. Tormena, R. Rittner, R. J. Abraham, E. A. Basso and B. C. Fiorin, *J. Phys. Org. Chem.* 2004, **17**, 42.
- <sup>2</sup> M. W. Wong, *Chem. Phys. Lett.* 1996, **256**, 391 – 399; S. E. Wheeler, A. J. McNeil, P. Müller, T. M. Swager and K. N. Houk, *J. Am. Chem. Soc.*, 2010, **132**, 3304.
- <sup>3</sup> a) R. F. Ribeiro, A. V. Marenich, C. J. Cramer, and D. G. Truhlar, *J. Phys. Chem. B* **2011**, *115*, 14556; b) S. Grimme, *Chemistry-Eur. J.* **2012**, *18*, 9955. c) M. L. Laury, S. E. Boesch, I. Haken, P. Sinha, R. A. Wheeler, and A. K. Wilson. *J. Comput. Chem.* **2011**, *32*, 2339.
- <sup>4</sup> GaussView 6.0.16, Semichem Inc, 2016.
- <sup>5</sup> C. Che, S. Li, Z. Yu, F. Li, S. Xin, L. Zhou, S. Lin, and Z. Yang, *ACS Comb. Sci.* 2013, **15**, 202.
- <sup>6</sup> T. Kawabata, C. Jiang, K. Hayashi, K. Tsubaki, T. Yoshimura, S. Majumdar, T. Sasamori, N. Tokitoh, *J. Am. Chem. Soc.* **2009**, *131*, 54.
- <sup>7</sup> D. Janssen-Müller, S. Singha, F. Lied, K. Gottschalk, F. Glorius., *Angew. Chem. Int. Ed.* 2017, *56*, 6276.
